# Supplementary material for: Synthesis, Reactions, and Agrochemical Studies of New 4,6-Diaryl-2-hydrazinylnicotinonitriles
Source: MDPI journal article supplement (doi:10.3390/ijms262411874), 2025-12-09
Supplement: s1 [file ijms-4015745-supplementary.pdf › ijms-4015745-supplementary.pdf]

## Synthesis, reactions and agrochemical studies of new 4,6-diaryl-2-hydrazinonicotinonitriles

Victor V. Dotsenko<sup>1,2,\*</sup>, Vladislav K. Kindop<sup>1</sup>, Vyacheslav K. Kindop<sup>1</sup>, Renat G. Achmiz<sup>1</sup>, Arina G. Levchenko<sup>1</sup>, Polina G. Dakhno<sup>1</sup>, Azamat Z. Temerdashev<sup>3</sup>, Yu-Qi Feng<sup>4</sup>, Quan-Fei Zhu<sup>4</sup>, Eva S. Daus<sup>1</sup>, Igor V. Yudaev<sup>5</sup>, Yuliia V. Daus<sup>5</sup>, Alexander A. Aksenov<sup>2</sup>, Nicolai A. Aksenov<sup>2</sup> and Inna V. Aksenova<sup>2</sup>

<sup>1</sup>Department of Organic Chemistry and Technologies, Kuban State University, 149 Stavropolskaya St., 350040 Krasnodar, Russia; victor\_dotsenko\_@mail.ru (V.V.D.); vlad.kindop@mail.ru (Vl.K.K.); slavakindop@mail.ru (V.K.K.); renat989898@gmail.com (A.R.G.); levchenko.arin@yandex.ru (L.A.G.); p.dahno@yandex.ru (D.P.G.); eva.daus.2008@gmail.com (E.S.D.).

<sup>2</sup>Department of Chemistry, North Caucasus Federal University, 1a Pushkin St., 355017 Stavropol, Russia; aaksenov@ncfu.ru (A.A.A.); radioanimation@rambler.ru (N.A.A.); inna-aksenova00@rambler.ru (I.V.A.)

<sup>3</sup>Department of Analytical Chemistry, Kuban State University, 149 Stavropolskaya St., 350040 Krasnodar, Russia; temerdashevaz@gmail.com (A.Z.T.)

<sup>4</sup>School of Bioengineering and Health, Wuhan Textile University, 1 Sunshine Avenue, Jiang Xia District, 430200 Wuhan, Hubei, China, yqfeng@whu.edu.cn (Y.Q.F.); qf\_zhu@whu.edu.cn (Q.F.Z.)

<sup>5</sup>Faculty of Energetics, Kuban State Agrarian University, 13 Kalinina St., 350044 Krasnodar, Russia; etsh1965@mail.ru (I.V.Y.); zirochka2505@gmail.com (Y.V.D.)

\*Correspondence: victor\_dotsenko\_@mail.ru (V.V.D.).

### Table of contents (selected spectral and X-ray data)

|                                                                                                                       |    |
|-----------------------------------------------------------------------------------------------------------------------|----|
| Figure S1. FTIR spectrum (nujol) of 2-bromo-3-cyanopyridine 15a .....                                                 | 5  |
| Figure S2. <sup>1</sup> H NMR spectrum of 2-bromo-3-cyanopyridine 15a, DMSO-d <sub>6</sub> (400 MHz) .....            | 5  |
| Figure S3. FTIR spectrum (KBr) of 2-bromo-3-cyanopyridine 15b .....                                                   | 6  |
| Figure S4. FTIR spectrum (nujol) of 2-bromo-3-cyanopyridine 15c .....                                                 | 6  |
| Figure S5. <sup>1</sup> H NMR spectrum of 2-bromo-3-cyanopyridine 15c, DMSO-d <sub>6</sub> (400 MHz).....             | 7  |
| Figure S6. <sup>13</sup> C NMR DEPTQ spectrum of 2-bromo-3-cyanopyridine 15c, DMSO-d <sub>6</sub> (101 MHz) .....     | 7  |
| Figure S7. FTIR spectrum (KBr) of 2-bromo-3-cyanopyridine 15d.....                                                    | 8  |
| Figure S8. FTIR spectrum (KBr) of 2-bromo-3-cyanopyridine 15e .....                                                   | 8  |
| Figure S9. FTIR spectrum (KBr) of 2-bromo-3-cyanopyridine 15f.....                                                    | 9  |
| Figure S10. FTIR spectrum (nujol) of 2-hydrazino-3-cyanopyridine 20a.....                                             | 9  |
| Figure S11. <sup>1</sup> H NMR spectrum of 2-hydrazino-3-cyanopyridine 20a, DMSO-d <sub>6</sub> (400 MHz)10           |    |
| Figure S12. <sup>13</sup> C DEPTQ NMR spectrum of 2-hydrazino-3-cyanopyridine 20a, DMSO-d <sub>6</sub> (101 MHz)..... | 10 |
| Figure S13. HRMS spectrum of 2-hydrazino-3-cyanopyridine 20a .....                                                    | 11 |
| Figure S14. FTIR spectrum (nujol) of 2-hydrazino-3-cyanopyridine 20b .....                                            | 11 |
| Figure S15. <sup>1</sup> H NMR spectrum of 2-hydrazino-3-cyanopyridine 20b, DMSO-d <sub>6</sub> (400 MHz)12           |    |
| Figure S16. <sup>13</sup> C NMR spectrum of 2-hydrazino-3-cyanopyridine 20b, DMSO-d <sub>6</sub> (101 MHz)12          |    |
| Figure S17. HRMS spectrum of 2-hydrazino-3-cyanopyridine 20b.....                                                     | 13 |
| Figure S18. FTIR spectrum (nujol) of 2-hydrazino-3-cyanopyridine 20c.....                                             | 13 |
| Figure S19. <sup>1</sup> H NMR spectrum of 2-hydrazino-3-cyanopyridine 20c, DMSO-d <sub>6</sub> (400 MHz)14           |    |
| Figure S20. <sup>13</sup> C NMR spectrum of 2-hydrazino-3-cyanopyridine 20c, DMSO-d <sub>6</sub> (101 MHz)14          |    |
| Figure S21. FTIR spectrum (nujol) of 2-hydrazino-3-cyanopyridine 20d .....                                            | 15 |

|                                                                                                            |    |
|------------------------------------------------------------------------------------------------------------|----|
| Figure S22. <sup>1</sup> H NMR spectrum of 2-hydrazino-3-cyanopyridine 20d, DMSO-d <sub>6</sub> (400 MHz)  | 15 |
| Figure S23. <sup>13</sup> C NMR spectrum of 2-hydrazino-3-cyanopyridine 20d, DMSO-d <sub>6</sub> (101 MHz) | 16 |
| Figure S24. HRMS spectrum of 2-hydrazino-3-cyanopyridine 20d.....                                          | 16 |
| Figure S25. FTIR spectrum (nujol) of 2-hydrazino-3-cyanopyridine 20e.....                                  | 17 |
| Figure S26. <sup>1</sup> H NMR spectrum of 2-hydrazino-3-cyanopyridine 20e, DMSO-d <sub>6</sub> (400 MHz)  | 17 |
| Figure S27. <sup>13</sup> C NMR spectrum of 2-hydrazino-3-cyanopyridine 20e, DMSO-d <sub>6</sub> (101 MHz) | 18 |
| Figure S28. HRMS spectrum of 2-hydrazino-3-cyanopyridine 20e .....                                         | 18 |
| Figure S29. FTIR spectrum (nujol) of 2-hydrazino-3-cyanopyridine 20f .....                                 | 19 |
| Figure S30. <sup>1</sup> H NMR spectrum of 2-hydrazino-3-cyanopyridine 20f, DMSO-d <sub>6</sub> (400 MHz)  | 19 |
| Figure S31. <sup>13</sup> C NMR spectrum of 2-hydrazino-3-cyanopyridine 20f, DMSO-d <sub>6</sub> (101 MHz) | 20 |
| Figure S32. HRMS spectrum of 2-hydrazino-3-cyanopyridine 20f.....                                          | 20 |
| Figure S33. FTIR spectrum (nujol) of 2-hydrazino-3-cyanopyridine 20g .....                                 | 21 |
| Figure S34. <sup>1</sup> H NMR spectrum of 2-hydrazino-3-cyanopyridine 20g, DMSO-d <sub>6</sub> (400 MHz)  | 21 |
| Figure S35. <sup>13</sup> C NMR spectrum of 2-hydrazino-3-cyanopyridine 20g, DMSO-d <sub>6</sub> (101 MHz) | 22 |
| Figure S36. HRMS spectrum of 2-hydrazino-3-cyanopyridine 20g.....                                          | 22 |
| Figure S37. HRMS spectrum of 2-hydrazino-3-cyanopyridine 20h.....                                          | 22 |
| Figure S38. FTIR spectrum (nujol) of 2-hydrazino-3-cyanopyridine 20h .....                                 | 23 |
| Figure S39. FTIR spectrum (nujol) of 2-hydrazino-3-cyanopyridine 20i .....                                 | 23 |
| Figure S40. HRMS spectrum of 2-hydrazino-3-cyanopyridine 20i.....                                          | 24 |
| Figure S41. FTIR spectrum (nujol) of 2-hydrazino-3-cyanopyridine 20j.....                                  | 24 |
| Figure S42. HRMS spectrum of 2-hydrazino-3-cyanopyridine 20j .....                                         | 24 |
| Figure S43. <sup>1</sup> H NMR spectrum of 2-hydrazino-3-cyanopyridine 20j, DMSO-d <sub>6</sub> (400 MHz)  | 25 |
| Figure S44. <sup>13</sup> C NMR spectrum of 2-hydrazino-3-cyanopyridine 20j, DMSO-d <sub>6</sub> (101 MHz) | 25 |
| Figure S45. FTIR spectrum (nujol) of hydrazone 21{1}.....                                                  | 26 |
| Figure S46. <sup>1</sup> H NMR spectrum of hydrazone 21{1}, DMSO-d <sub>6</sub> (400 MHz) .....            | 26 |
| Figure S47. HRMS spectrum of hydrazone 21{1} .....                                                         | 27 |
| Figure S48. FTIR spectrum (nujol) of hydrazone 21{3}.....                                                  | 27 |
| Figure S49. HRMS spectrum of hydrazone 21{3} .....                                                         | 27 |
| Figure S50. <sup>1</sup> H NMR spectrum of hydrazone 21{3}, DMSO-d <sub>6</sub> (400 MHz) .....            | 28 |
| Figure S51. <sup>13</sup> C NMR spectrum of hydrazone 21{3}, DMSO-d <sub>6</sub> (101 MHz) .....           | 28 |
| Figure S52. FTIR spectrum (nujol) of hydrazone 21{4}.....                                                  | 29 |
| Figure S53. <sup>1</sup> H NMR spectrum of hydrazone 21{4}, acetone-d <sub>6</sub> (400 MHz).....          | 29 |
| Figure S54. <sup>13</sup> C NMR spectrum of hydrazone 21{4}, DMSO-d <sub>6</sub> (101 MHz) .....           | 30 |
| Figure S55. HRMS spectrum of hydrazone 21{4} .....                                                         | 30 |
| Figure S56. HRMS spectrum of hydrazone 21{5} .....                                                         | 30 |
| Figure S57. FTIR spectrum (nujol) of hydrazone 21{5}.....                                                  | 31 |
| Figure S58. FTIR spectrum (nujol) of hydrazone 21{6}.....                                                  | 31 |
| Figure S59. <sup>1</sup> H NMR spectrum of hydrazone 21{6}, DMSO-d <sub>6</sub> (400 MHz) .....            | 32 |
| Figure S60. HRMS spectrum of hydrazone 21{6} .....                                                         | 32 |
| Figure S61. FTIR spectrum (nujol) of hydrazone 21{7}.....                                                  | 33 |
| Figure S62. <sup>1</sup> H NMR spectrum of hydrazone 21{7}, DMSO-d <sub>6</sub> (400 MHz) .....            | 33 |
| Figure S63. HRMS spectrum of hydrazone 21{7} .....                                                         | 34 |
| Figure S64. FTIR spectrum (nujol) of hydrazone 21{8}.....                                                  | 34 |
| Figure S65. HRMS spectrum of hydrazone 21{8} .....                                                         | 34 |

|                                                                                                                               |    |
|-------------------------------------------------------------------------------------------------------------------------------|----|
| Figure S66. <sup>1</sup> H NMR spectrum of hydrazone 21{8}, DMSO-d <sub>6</sub> (400 MHz) .....                               | 35 |
| Figure S67. <sup>13</sup> C NMR spectrum of hydrazone 21{8}, DMSO-d <sub>6</sub> (101 MHz) .....                              | 35 |
| Figure S68. FTIR spectrum (nujol) of hydrazone 21{9} .....                                                                    | 36 |
| Figure S69. <sup>1</sup> H NMR spectrum of hydrazone 21{9}, DMSO-d <sub>6</sub> (400 MHz) .....                               | 36 |
| Figure S70. <sup>13</sup> C NMR spectrum of hydrazone 21{9}, DMSO-d <sub>6</sub> (101 MHz) .....                              | 37 |
| Figure S71. HRMS spectrum of hydrazone 21{9} .....                                                                            | 37 |
| Figure S72. FTIR spectrum (nujol) of hydrazone 21{11}, solvate with EtOH 1 : 1 .....                                          | 38 |
| Figure S73. <sup>1</sup> H NMR spectrum of hydrazone 21{11}, solvate with EtOH 1 : 1, DMSO-d <sub>6</sub> (400 MHz) .....     | 38 |
| Figure S74. <sup>13</sup> C NMR spectrum of hydrazone 21{11}, solvate with EtOH 1 : 1, DMSO-d <sub>6</sub> (101 MHz) .....    | 39 |
| Figure S75. HRMS spectrum of hydrazone 21{11} .....                                                                           | 39 |
| Figure S76. FTIR spectrum (nujol) of hydrazone 21{12}, solvate with EtOH 1 : 1 .....                                          | 40 |
| Figure S77. <sup>1</sup> H NMR spectrum of hydrazone 21{12}, solvate with EtOH 1 : 1, DMSO-d <sub>6</sub> (400 MHz) .....     | 40 |
| Figure S78. <sup>13</sup> C NMR spectrum of hydrazone 21{12}, solvate with EtOH 1 : 1, DMSO-d <sub>6</sub> (101 MHz) .....    | 41 |
| Figure S79. HRMS spectrum of hydrazone 21{12} .....                                                                           | 41 |
| Figure S80. FTIR spectrum (nujol) of hydrazone 21{13} .....                                                                   | 42 |
| Figure S81. <sup>1</sup> H NMR spectrum of hydrazone 21{13}, DMSO-d <sub>6</sub> (400 MHz) .....                              | 42 |
| Figure S82. <sup>13</sup> C NMR spectrum of hydrazone 21{13}, DMSO-d <sub>6</sub> (101 MHz) .....                             | 43 |
| Figure S83. HRMS spectrum of hydrazone 21{13} .....                                                                           | 43 |
| Figure S84. HRMS spectrum of hydrazone 21{14} .....                                                                           | 43 |
| Figure S85. FTIR spectrum (nujol) of hydrazone 21{14}, solvate with dioxane 1 : 1, .....                                      | 44 |
| Figure S86. <sup>1</sup> H NMR spectrum of hydrazone 21{14}, solvate with dioxane 1 : 1, DMSO-d <sub>6</sub> (400 MHz) .....  | 44 |
| Figure S87. <sup>13</sup> C NMR spectrum of hydrazone 21{14}, solvate with dioxane 1 : 1, DMSO-d <sub>6</sub> (101 MHz) ..... | 45 |
| Figure S88. FTIR spectrum (nujol) of hydrazone 21{15} .....                                                                   | 45 |
| Figure S89. <sup>1</sup> H NMR spectrum of hydrazone 21{15}, acetone-d <sub>6</sub> (400 MHz) .....                           | 46 |
| Figure S90. <sup>13</sup> C NMR spectrum of hydrazone 21{15}, acetone-d <sub>6</sub> (101 MHz) .....                          | 46 |
| Figure S91. HRMS spectrum of hydrazone 21{15} .....                                                                           | 47 |
| Figure S92. FTIR spectrum (nujol) of hydrazone 21{16} .....                                                                   | 47 |
| Figure S93. HRMS spectrum of hydrazone 21{16} .....                                                                           | 48 |
| Figure S94. FTIR spectrum (nujol) of hydrazone 21{17} .....                                                                   | 48 |
| Figure S95. FTIR spectrum (nujol) of hydrazone 21{19} .....                                                                   | 49 |
| Figure S96. <sup>1</sup> H NMR spectrum of hydrazone 21{19}, DMSO-d <sub>6</sub> (400 MHz) .....                              | 49 |
| Figure S97. <sup>13</sup> C NMR spectrum of hydrazone 21{19}, DMSO-d <sub>6</sub> (101 MHz) .....                             | 50 |
| Figure S98. HRMS spectrum of hydrazone 21{19} .....                                                                           | 50 |
| Figure S99. FTIR spectrum (nujol) of hydrazone 21{20} .....                                                                   | 51 |
| Figure S100. <sup>1</sup> H NMR spectrum of hydrazone 21{20}, DMSO-d <sub>6</sub> (400 MHz) .....                             | 51 |
| Figure S101. <sup>13</sup> C NMR spectrum of hydrazone 21{20}, DMSO-d <sub>6</sub> (101 MHz) .....                            | 52 |
| Figure S102. HRMS spectrum of hydrazone 21{20} .....                                                                          | 52 |

|                                                                                                                                                                                                                                                                                                                                                                                                                                                                                                             |    |
|-------------------------------------------------------------------------------------------------------------------------------------------------------------------------------------------------------------------------------------------------------------------------------------------------------------------------------------------------------------------------------------------------------------------------------------------------------------------------------------------------------------|----|
| Figure S103. ORTEP drawing of X-ray structure for 2-bromo-4-(4-chlorophenyl)-6-phenylnicotinonitrile (15a) with 50% probability (CCDC deposition number 2499675) .....                                                                                                                                                                                                                                                                                                                                      | 53 |
| Figure S104. Microphoto images of the single crystal of 2-bromo-4-(4-chlorophenyl)-6-phenylnicotinonitrile 15a .....                                                                                                                                                                                                                                                                                                                                                                                        | 53 |
| Table S1. Crystal data and structure refinement for 2-bromo-4-(4-chlorophenyl)-6-phenylnicotinonitrile (15a).....                                                                                                                                                                                                                                                                                                                                                                                           | 53 |
| Table S2. Fractional Atomic Coordinates ( $\times 10^4$ ) and Equivalent Isotropic Displacement Parameters ( $\text{\AA}^2 \times 10^3$ ) for 2-bromo-4-(4-chlorophenyl)-6-phenylnicotinonitrile (15a). .....                                                                                                                                                                                                                                                                                               | 55 |
| Table S3. Anisotropic Displacement Parameters ( $\text{\AA}^2 \times 10^3$ ) for 2-bromo-4-(4-chlorophenyl)-6-phenylnicotinonitrile (15a).....                                                                                                                                                                                                                                                                                                                                                              | 56 |
| Table S4. Bond Lengths for 2-bromo-4-(4-chlorophenyl)-6-phenylnicotinonitrile (15a). .....                                                                                                                                                                                                                                                                                                                                                                                                                  | 56 |
| Table S5. Bond Angles for 2-bromo-4-(4-chlorophenyl)-6-phenylnicotinonitrile (15a).....                                                                                                                                                                                                                                                                                                                                                                                                                     | 57 |
| Table S6. Torsion Angles for 2-bromo-4-(4-chlorophenyl)-6-phenylnicotinonitrile (15a)....                                                                                                                                                                                                                                                                                                                                                                                                                   | 57 |
| Table S7. Hydrogen Atom Coordinates ( $\text{\AA} \times 10^4$ ) and Isotropic Displacement Parameters ( $\text{\AA}^2 \times 10^3$ ) for 2-bromo-4-(4-chlorophenyl)-6-phenylnicotinonitrile (15a) .....                                                                                                                                                                                                                                                                                                    | 58 |
| Figure S105. ORTEP drawings of X-ray structures for co-crystallized (2 <i>S</i> *,3 <i>R</i> *,4 <i>S</i> *,6 <i>R</i> *)-3-benzoyl-5-bromo-4-hydroxy-4-phenyl-2,6-di- <i>p</i> -tolylcyclohexane-1,1-dicarbonitrile 17-Br (upper image) and (2 <i>S</i> *,3 <i>R</i> *,4 <i>S</i> *,6 <i>R</i> *)-3-benzoyl-4-hydroxy-4-phenyl-2,6-di- <i>p</i> -tolylcyclohexane-1,1-dicarbonitrile 17 (bottom image), solvate with AcOH. Ellipsoids are given with 50% probability (CCDC deposition number 2499676)..... | 59 |
| Figure S106. Microphoto images of the single crystal of 17 + 17-Br co-crystals.....                                                                                                                                                                                                                                                                                                                                                                                                                         | 60 |
| Table S8. Crystal data and structure refinement for co-crystals of cyclohexanols 17 + 17-Br.....                                                                                                                                                                                                                                                                                                                                                                                                            | 60 |
| Table S9. Fractional Atomic Coordinates ( $\times 10^4$ ) and Equivalent Isotropic Displacement Parameters ( $\text{\AA}^2 \times 10^3$ ) for co-crystals of cyclohexanols 17 + 17-Br. ....                                                                                                                                                                                                                                                                                                                 | 60 |
| Table S10. Anisotropic Displacement Parameters ( $\text{\AA}^2 \times 10^3$ ) for co-crystals of cyclohexanols 17 + 17-Br. ....                                                                                                                                                                                                                                                                                                                                                                             | 62 |
| Table S11. Bond Lengths for co-crystals of cyclohexanols 17 + 17-Br.....                                                                                                                                                                                                                                                                                                                                                                                                                                    | 63 |
| Table S12. Bond Angles for co-crystals of cyclohexanols 17 + 17-Br. ....                                                                                                                                                                                                                                                                                                                                                                                                                                    | 64 |
| Table S13. Torsion Angles for co-crystals of cyclohexanols 17 + 17-Br .....                                                                                                                                                                                                                                                                                                                                                                                                                                 | 65 |
| Table S14. Hydrogen Atom Coordinates ( $\text{\AA} \times 10^4$ ) and Isotropic Displacement Parameters ( $\text{\AA}^2 \times 10^3$ ) for co-crystals of cyclohexanols 17 + 17-Br. ....                                                                                                                                                                                                                                                                                                                    | 66 |
| Table S15. Atomic Occupancy for co-crystals of cyclohexanols 17 + 17-Br .....                                                                                                                                                                                                                                                                                                                                                                                                                               | 67 |

**Figure S1. FTIR spectrum (nujol) of 2-bromo-3-cyanopyridine 15a**

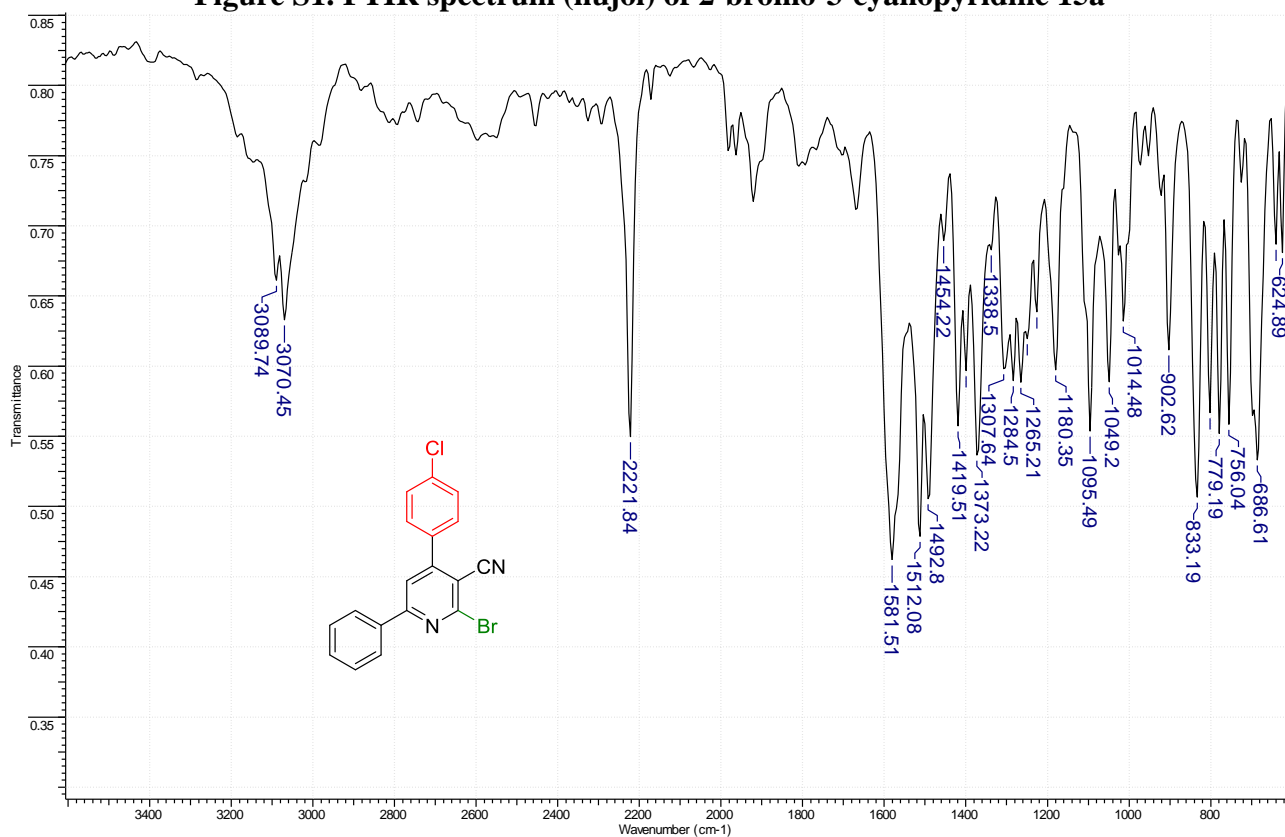

**Figure S2. <sup>1</sup>H NMR spectrum of 2-bromo-3-cyanopyridine 15a, DMSO-d<sub>6</sub> (400 MHz)**

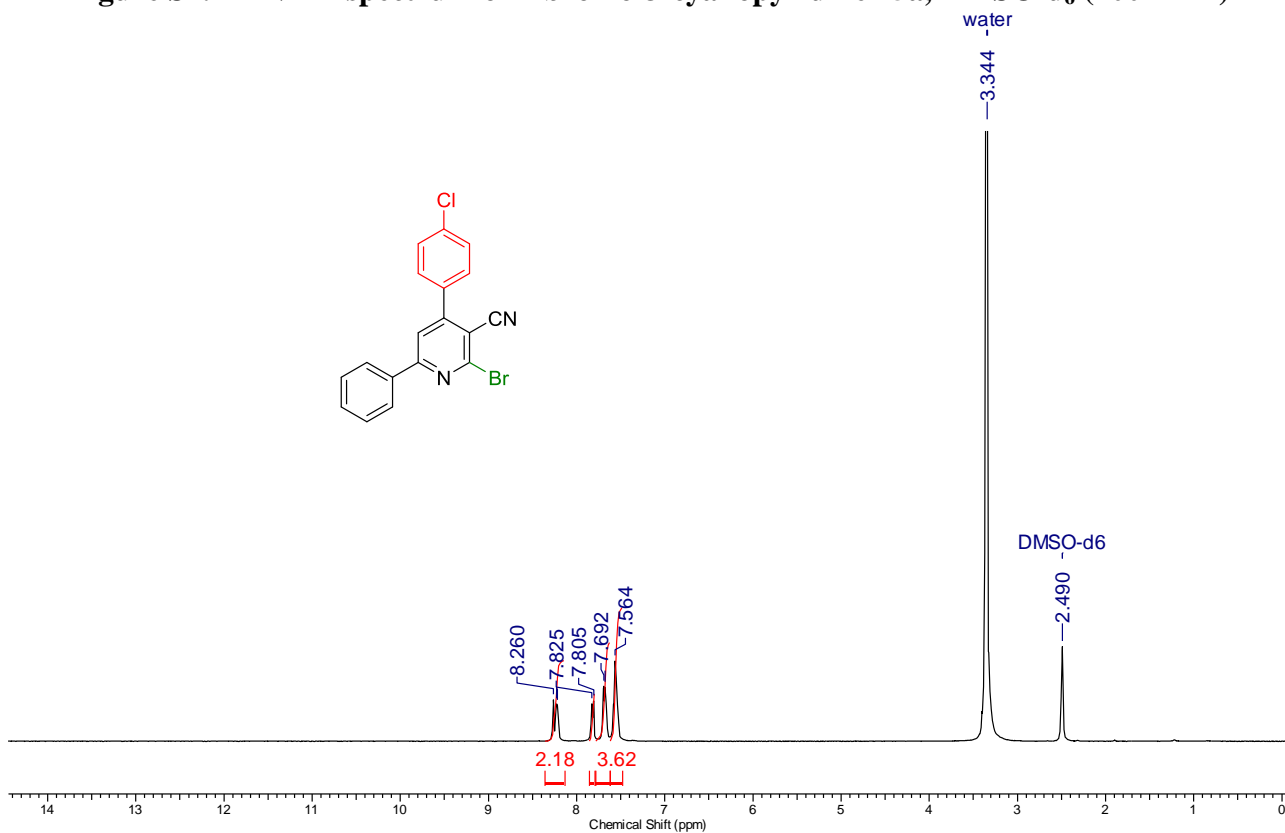

**Figure S3. FTIR spectrum (KBr) of 2-bromo-3-cyanopyridine 15b**

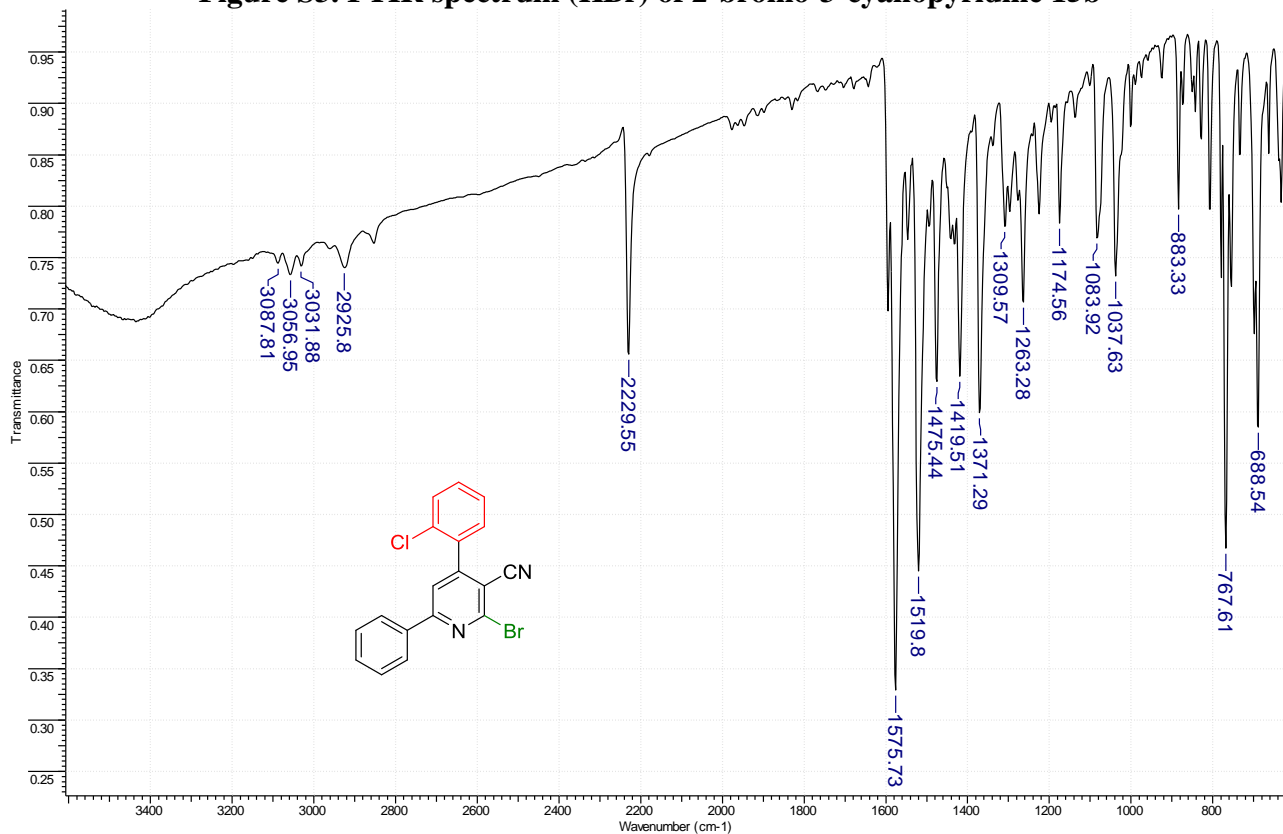

**Figure S4. FTIR spectrum (nujol) of 2-bromo-3-cyanopyridine 15c**

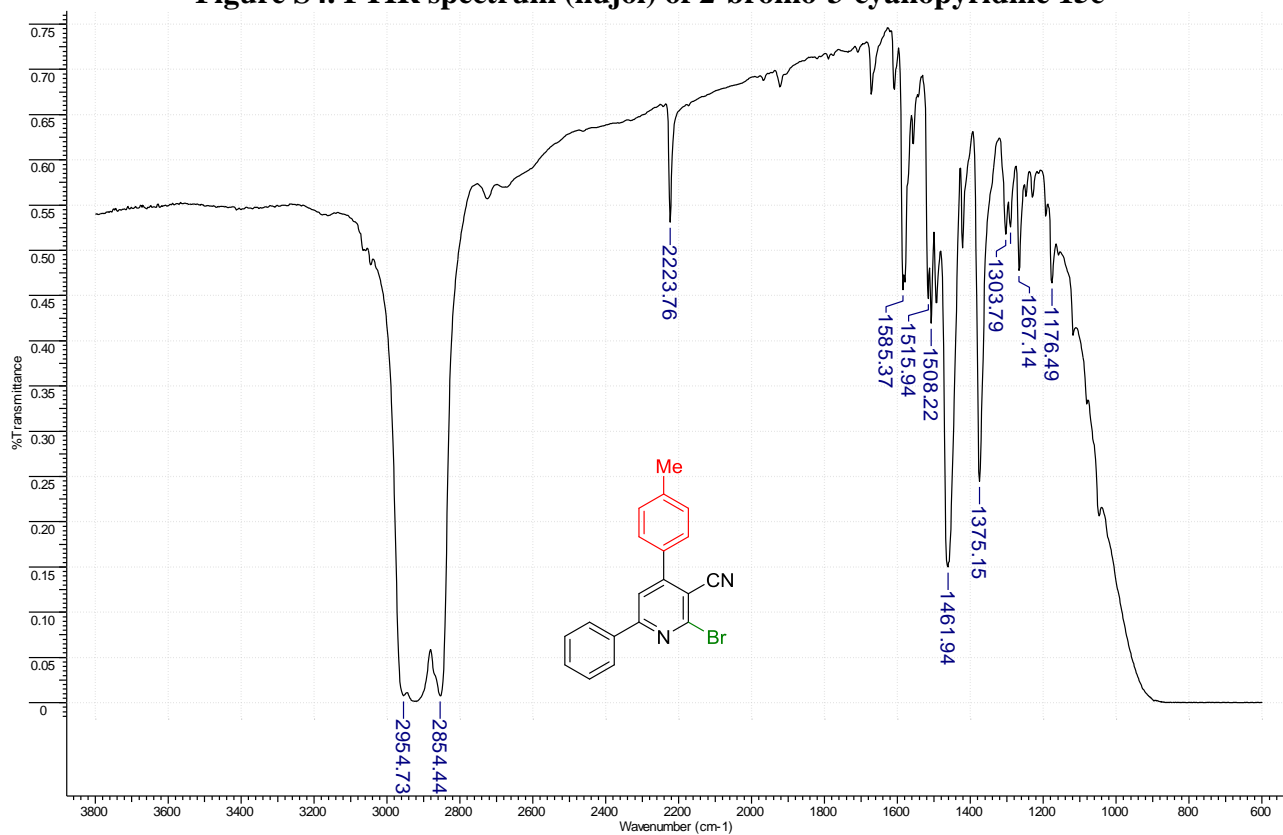

Figure S5.  $^1\text{H}$  NMR spectrum of 2-bromo-3-cyanopyridine 15c, DMSO- $\text{d}_6$  (400 MHz)

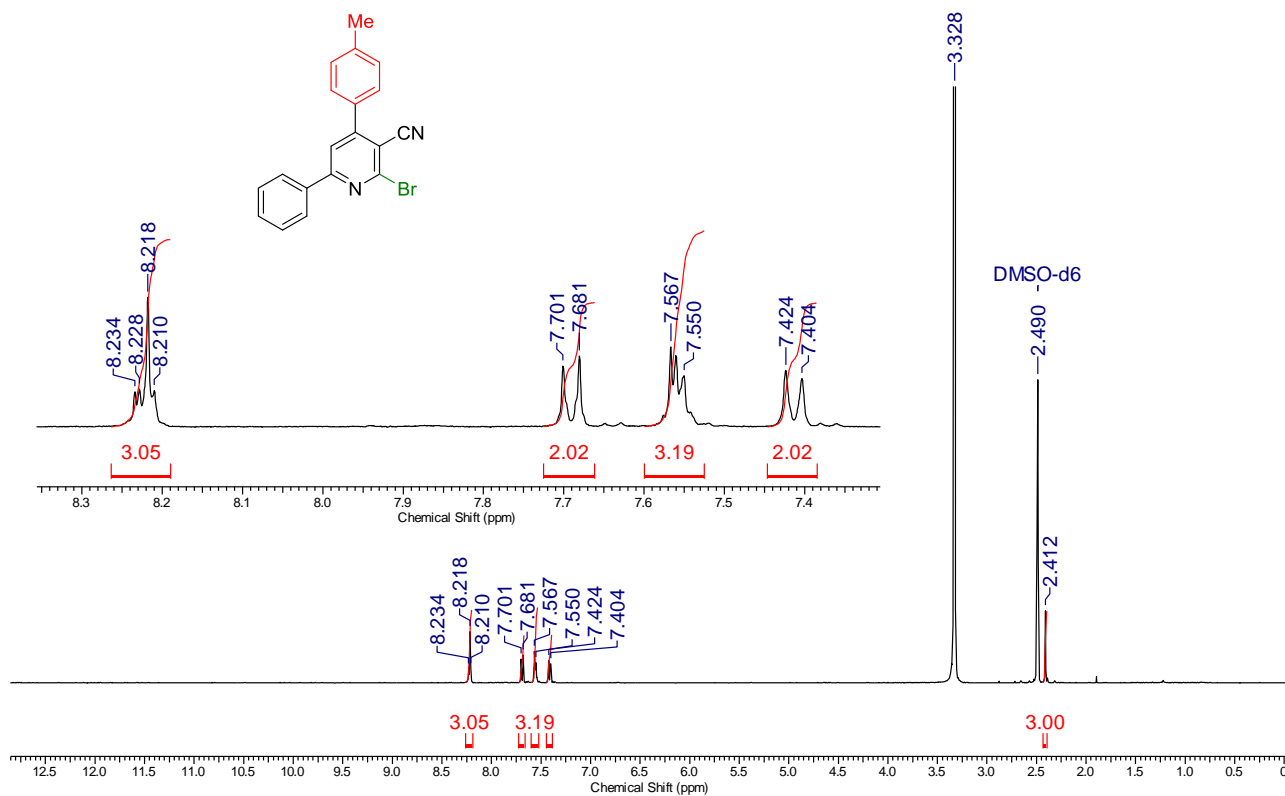

Figure S6.  $^{13}\text{C}$  NMR DEPTQ spectrum of 2-bromo-3-cyanopyridine 15c, DMSO- $\text{d}_6$  (101 MHz)

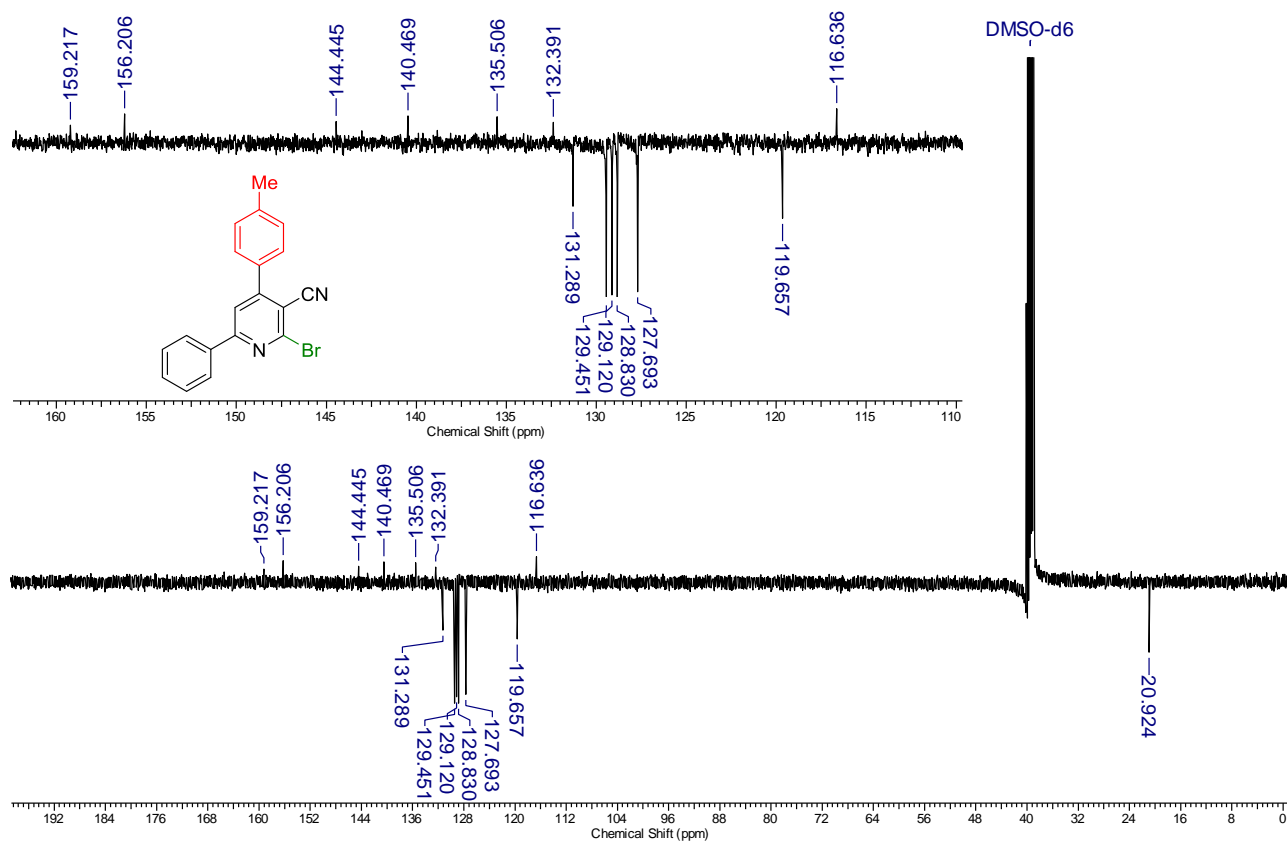

**Figure S7. FTIR spectrum (KBr) of 2-bromo-3-cyanopyridine 15d**

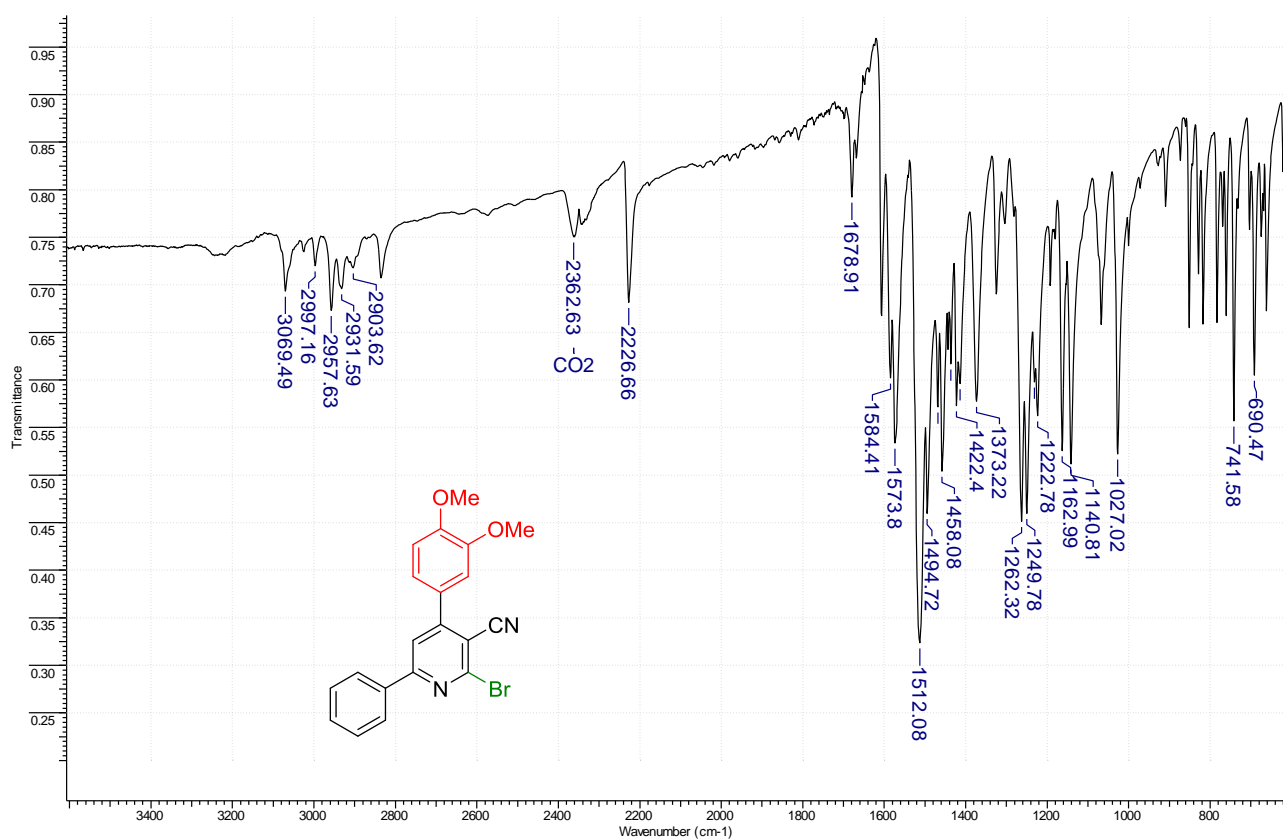

**Figure S8. FTIR spectrum (KBr) of 2-bromo-3-cyanopyridine 15e**

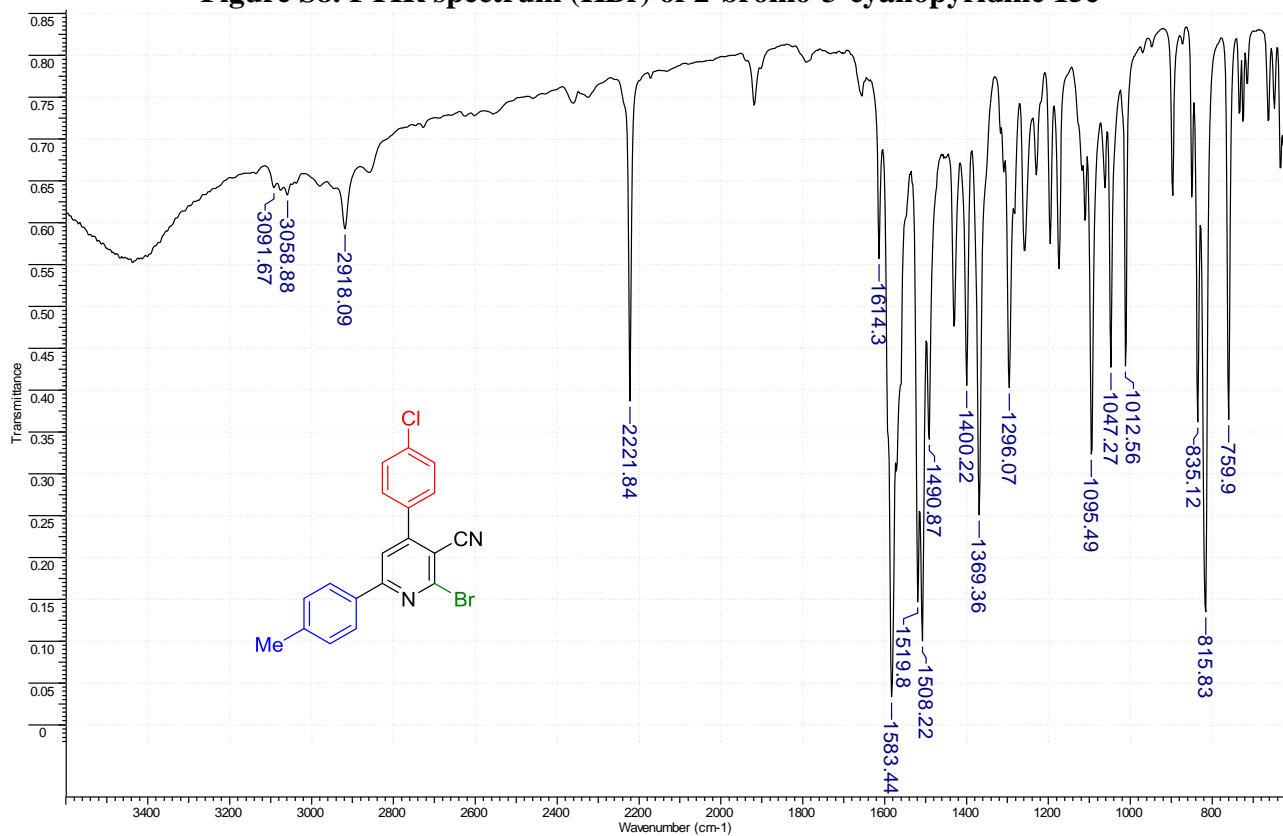



**Figure S9. FTIR spectrum (KBr) of 2-bromo-3-cyanopyridine 15f**

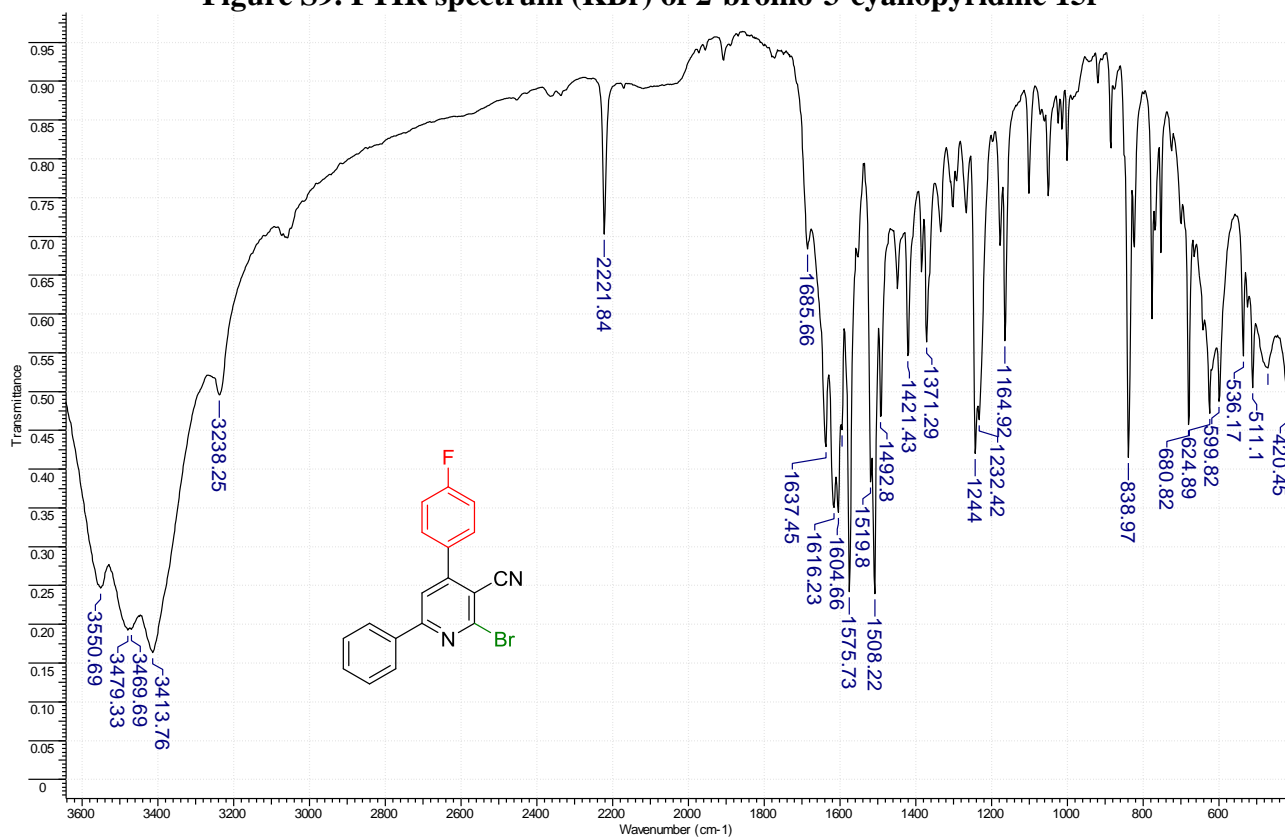

**Figure S10. FTIR spectrum (nujol) of 2-hydrazino-3-cyanopyridine 20a**

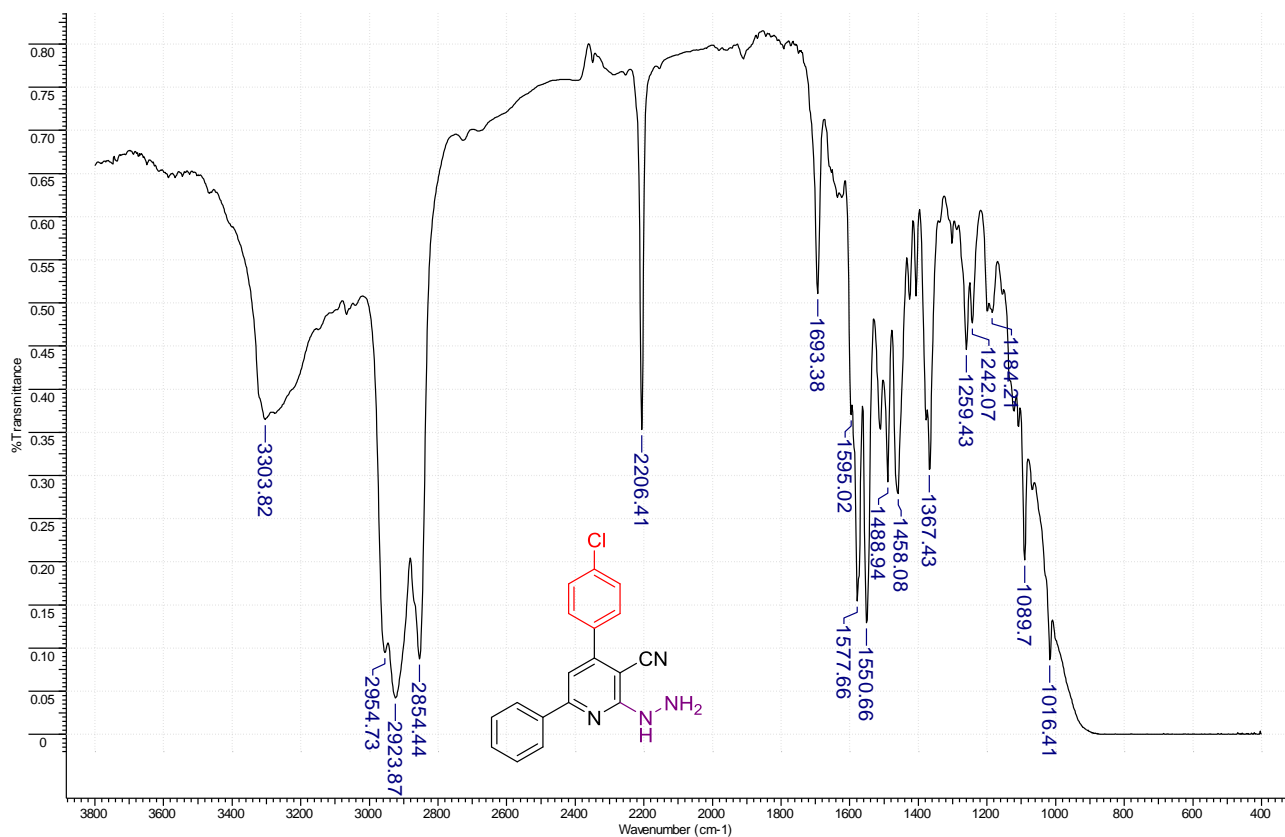

Figure S11.  $^1\text{H}$  NMR spectrum of 2-hydrazino-3-cyanopyridine 20a, DMSO- $\text{d}_6$  (400 MHz)

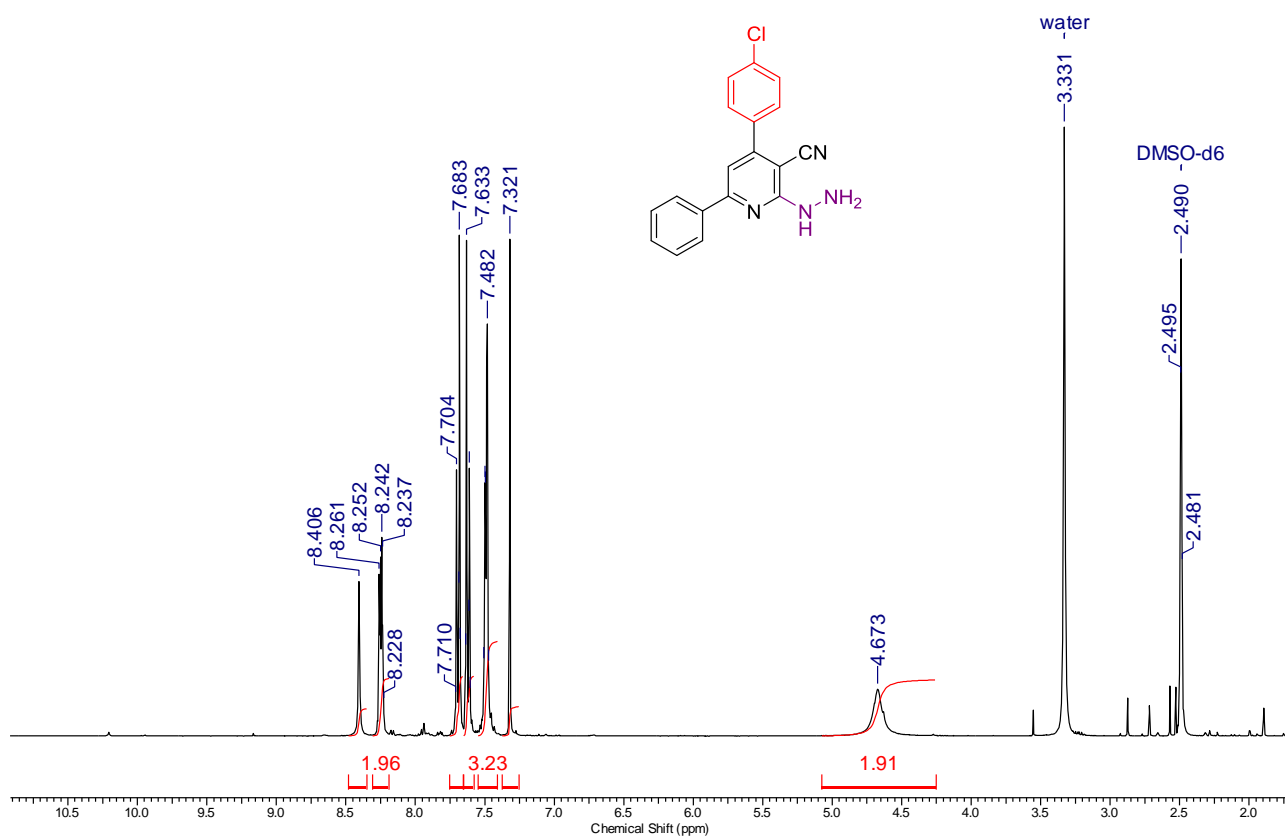

Figure S12.  $^{13}\text{C}$  DEPTQ NMR spectrum of 2-hydrazino-3-cyanopyridine 20a, DMSO- $\text{d}_6$  (101 MHz)

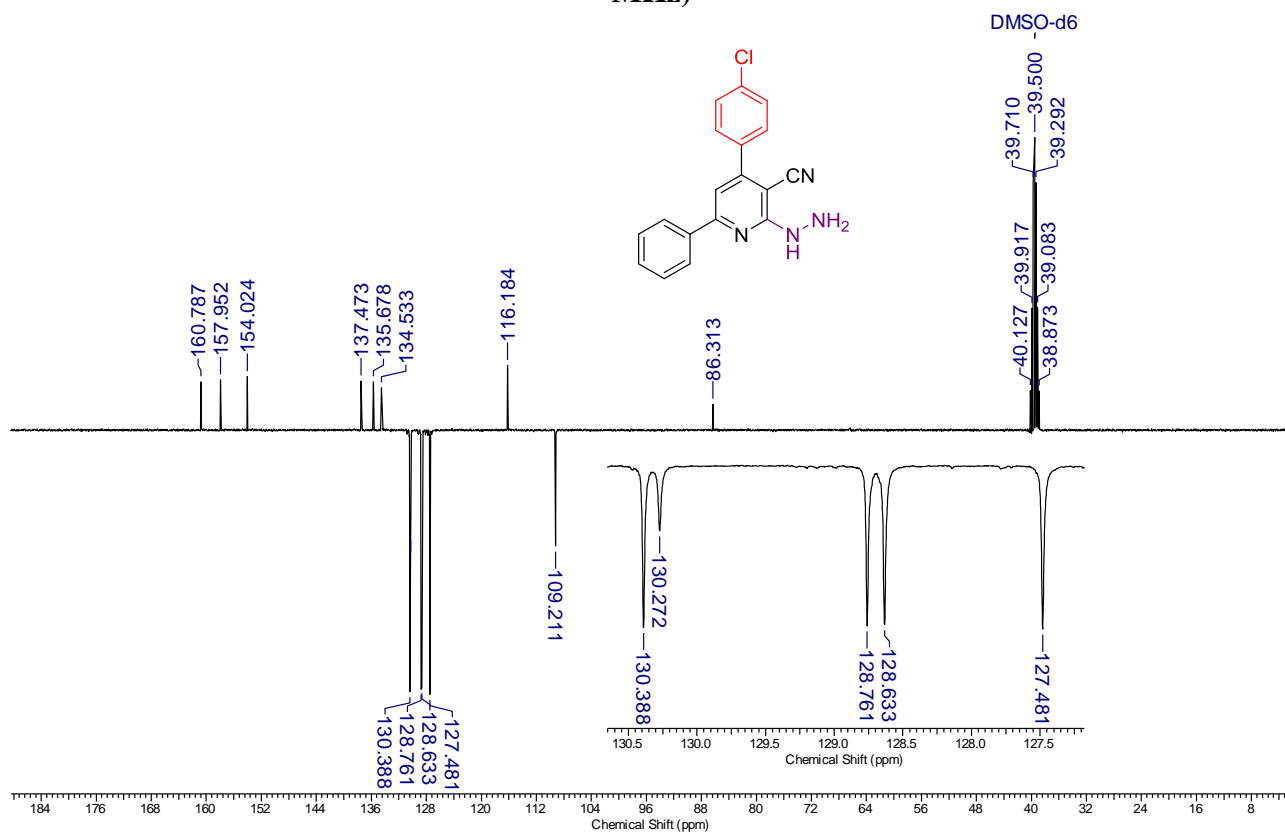

**Figure S13. HRMS spectrum of 2-hydrazino-3-cyanopyridine 20a**

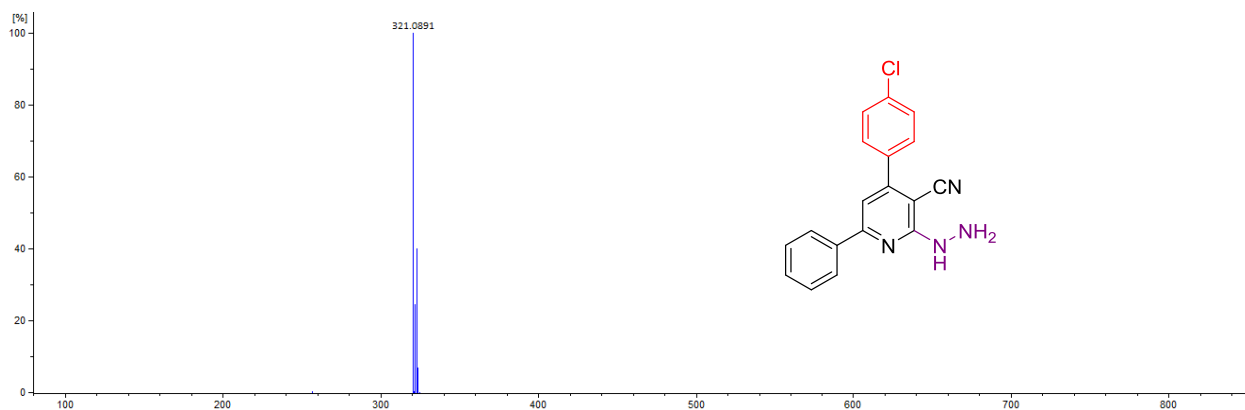

**Figure S14. FTIR spectrum (nujol) of 2-hydrazino-3-cyanopyridine 20b**

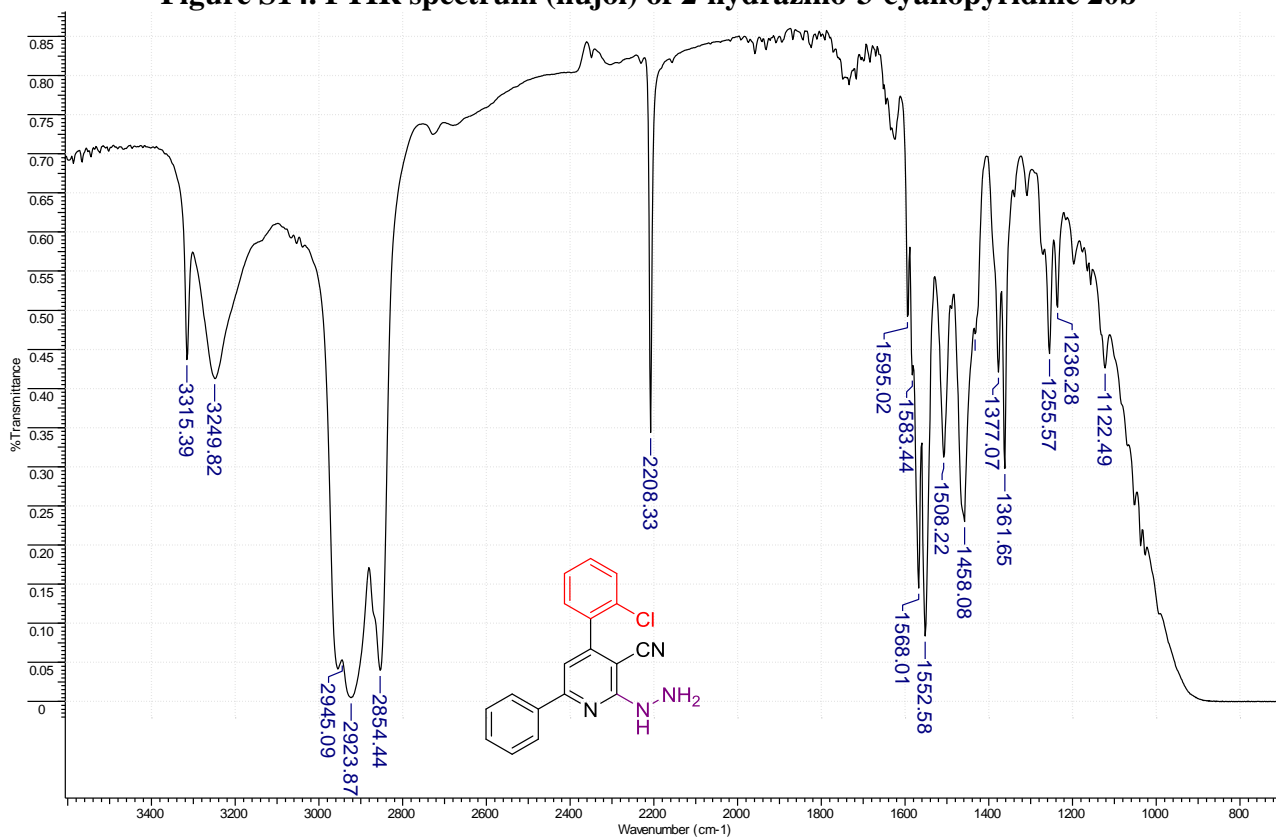

Figure S15.  $^1\text{H}$  NMR spectrum of 2-hydrazino-3-cyanopyridine 20b, DMSO- $\text{d}_6$  (400 MHz)

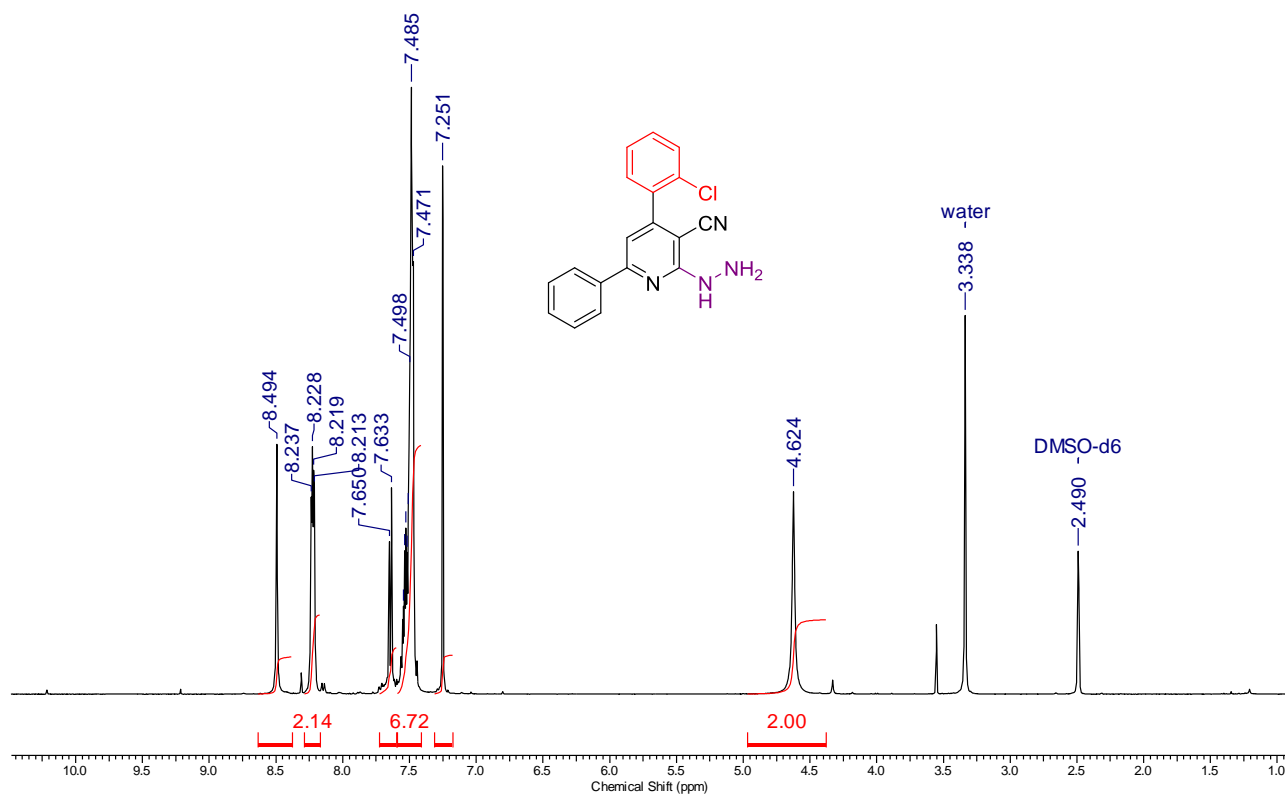

Figure S16.  $^{13}\text{C}$  NMR spectrum of 2-hydrazino-3-cyanopyridine 20b, DMSO- $\text{d}_6$  (101 MHz)

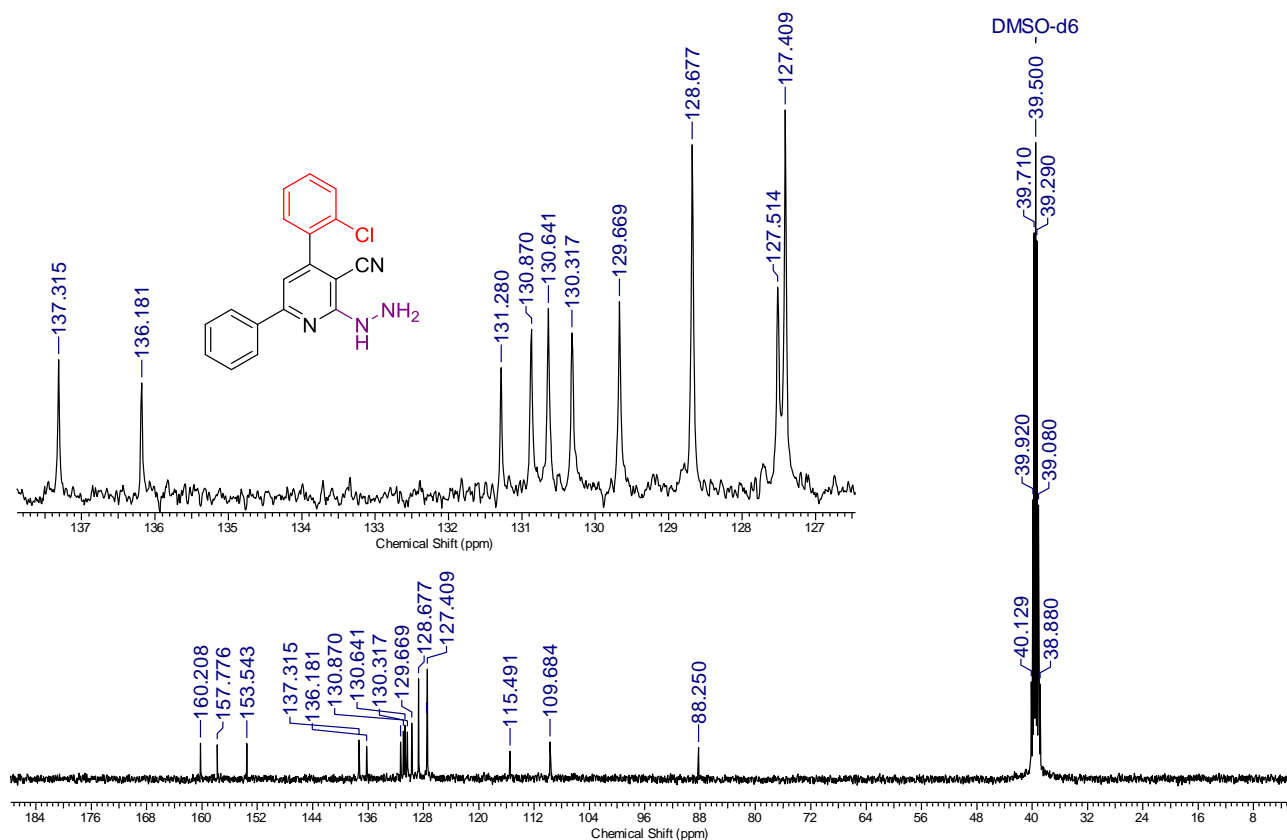

**Figure S17. HRMS spectrum of 2-hydrazino-3-cyanopyridine 20b**

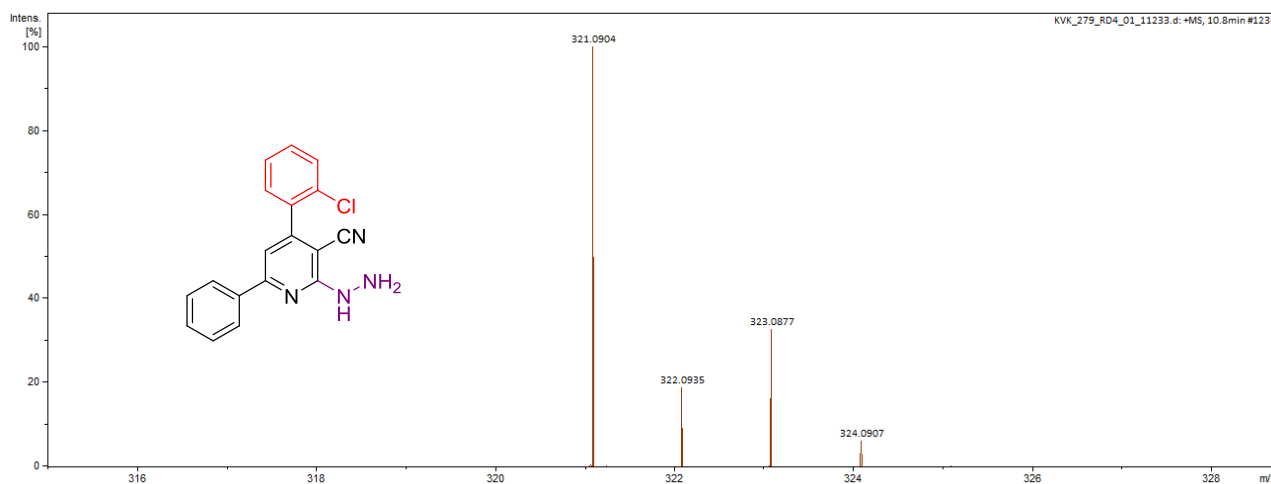

**Figure S18. FTIR spectrum (nujol) of 2-hydrazino-3-cyanopyridine 20c**

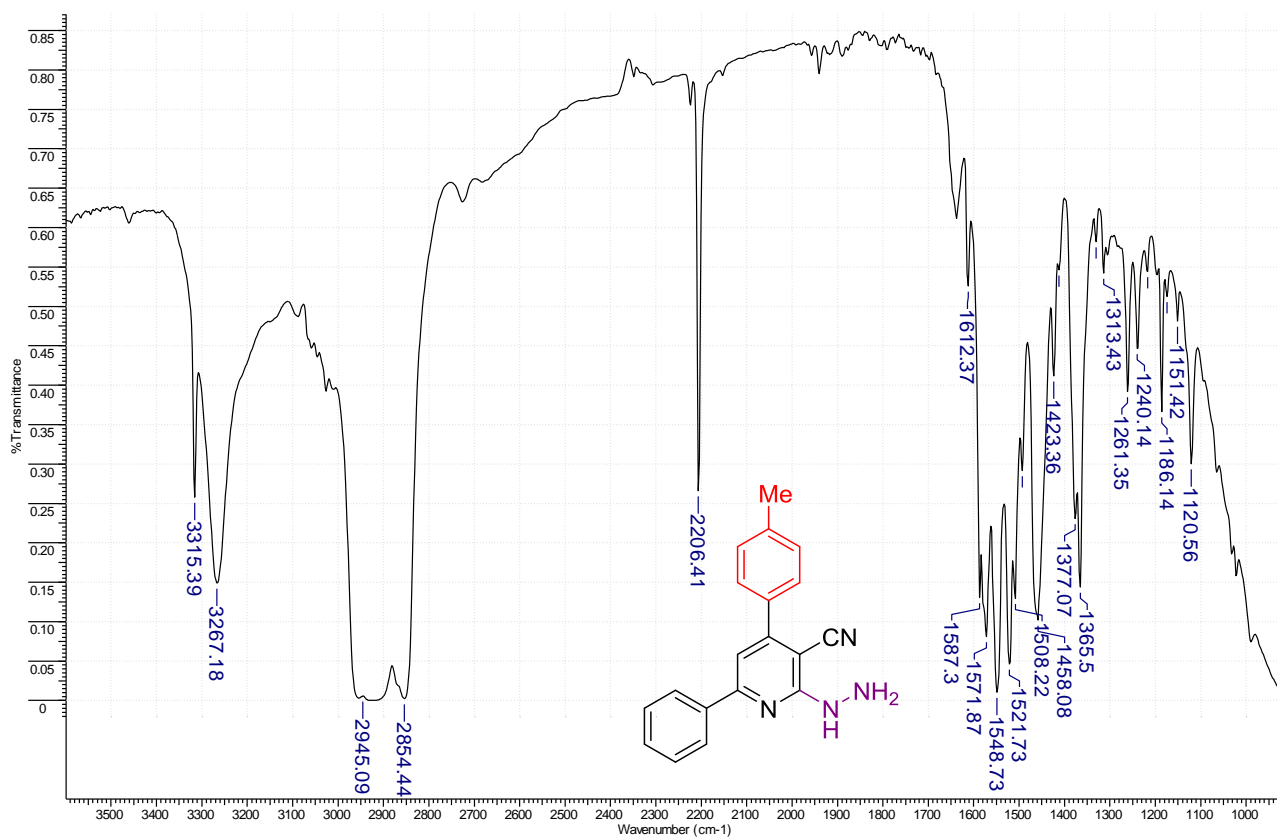

Figure S19.  $^1\text{H}$  NMR spectrum of 2-hydrazino-3-cyanopyridine 20c, DMSO- $\text{d}_6$  (400 MHz)

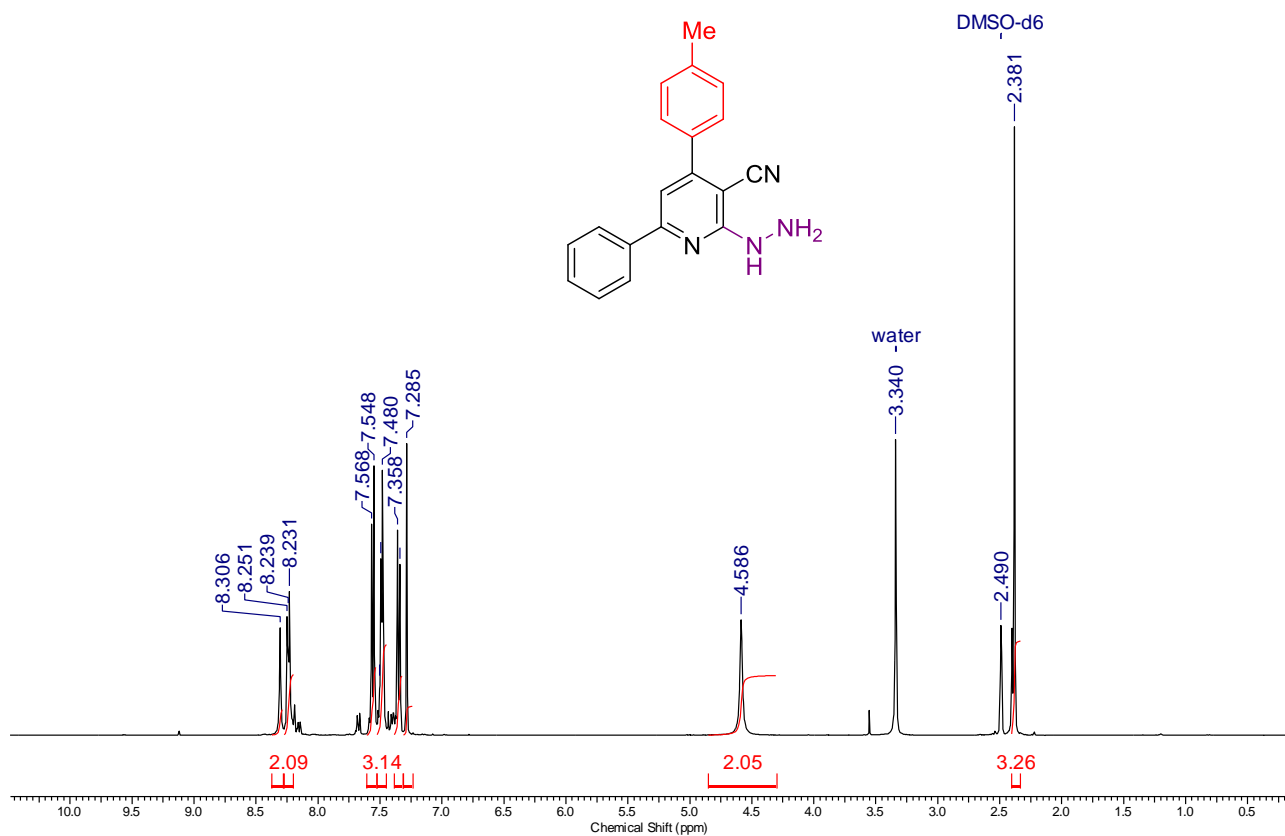

Figure S20.  $^{13}\text{C}$  NMR spectrum of 2-hydrazino-3-cyanopyridine 20c, DMSO- $\text{d}_6$  (101 MHz)

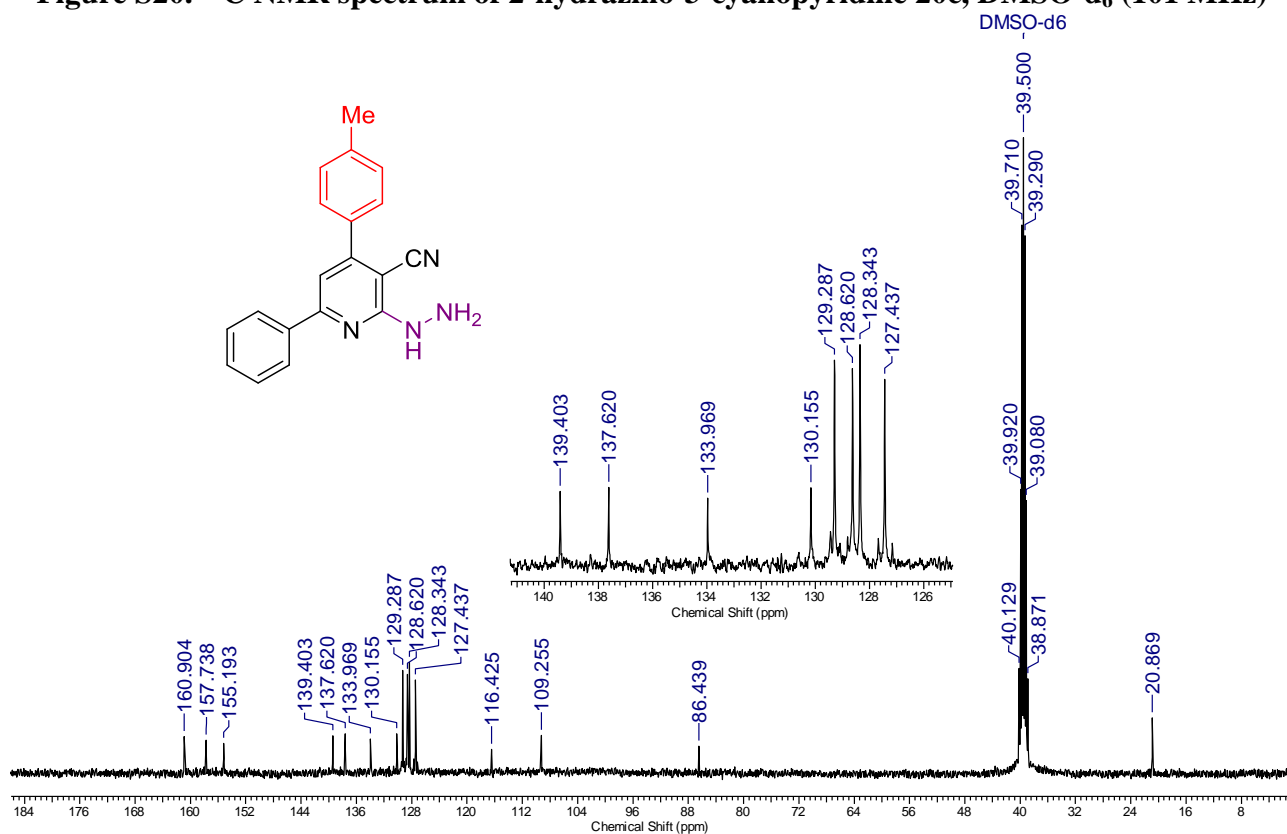

Figure S21. FTIR spectrum (nujol) of 2-hydrazino-3-cyanopyridine 20d

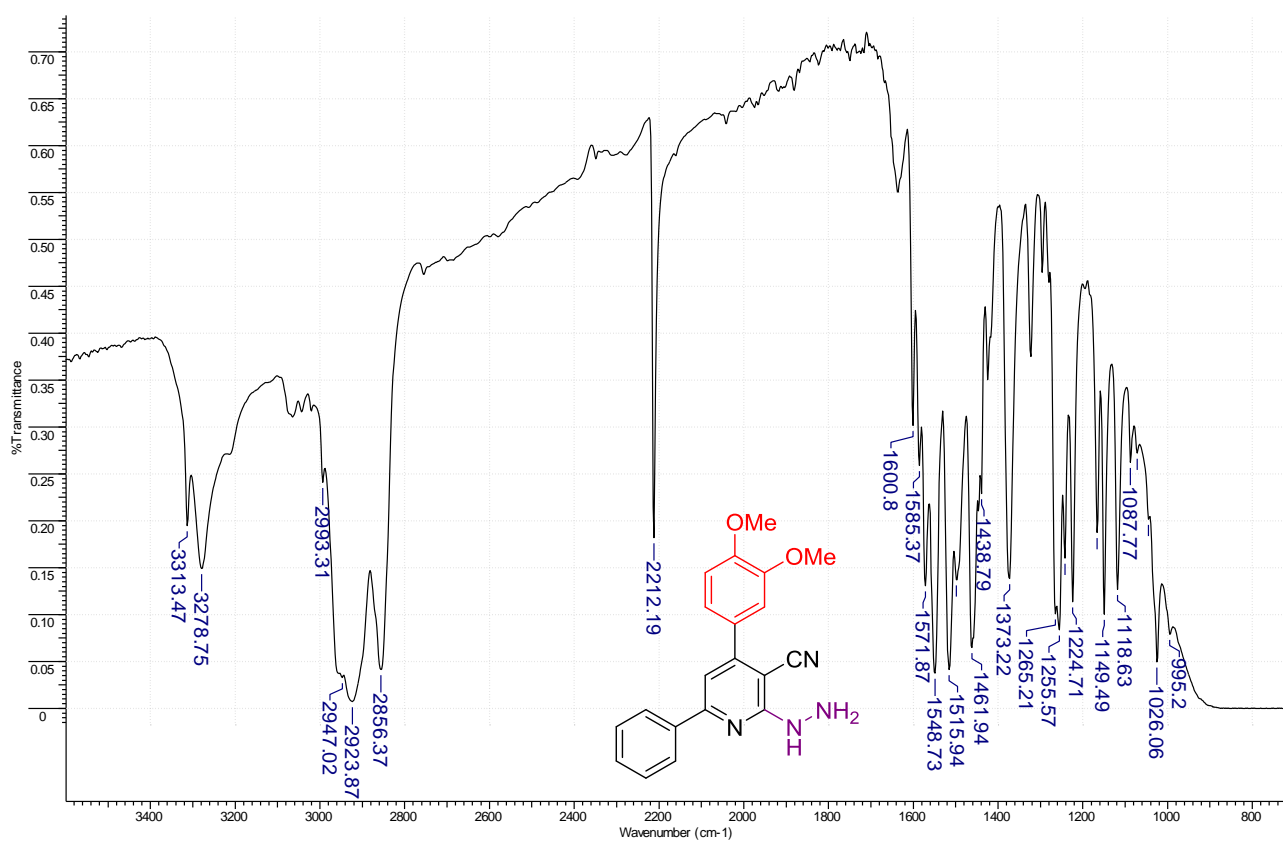

Figure S22. <sup>1</sup>H NMR spectrum of 2-hydrazino-3-cyanopyridine 20d, DMSO-d<sub>6</sub> (400 MHz)

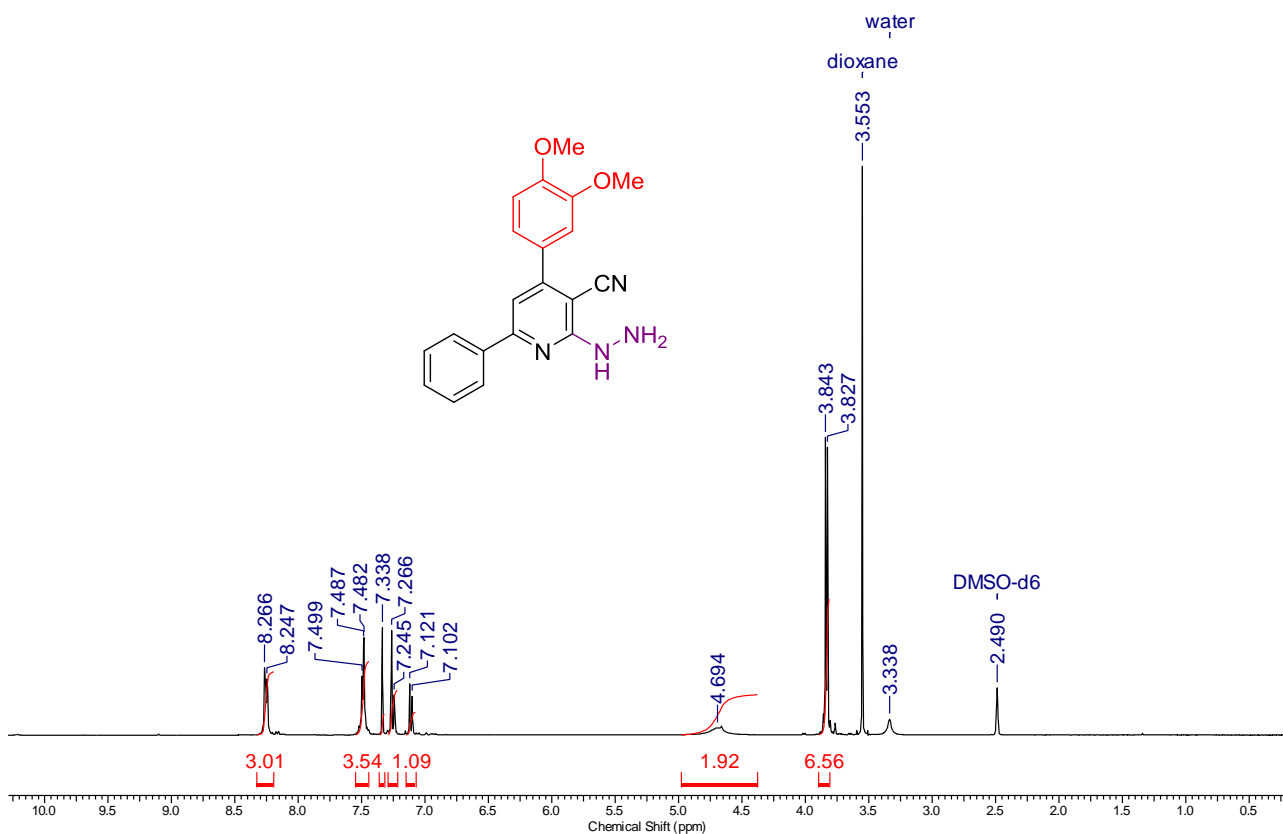

Figure S23.  $^{13}\text{C}$  NMR spectrum of 2-hydrazino-3-cyanopyridine 20d, DMSO- $d_6$  (101 MHz)

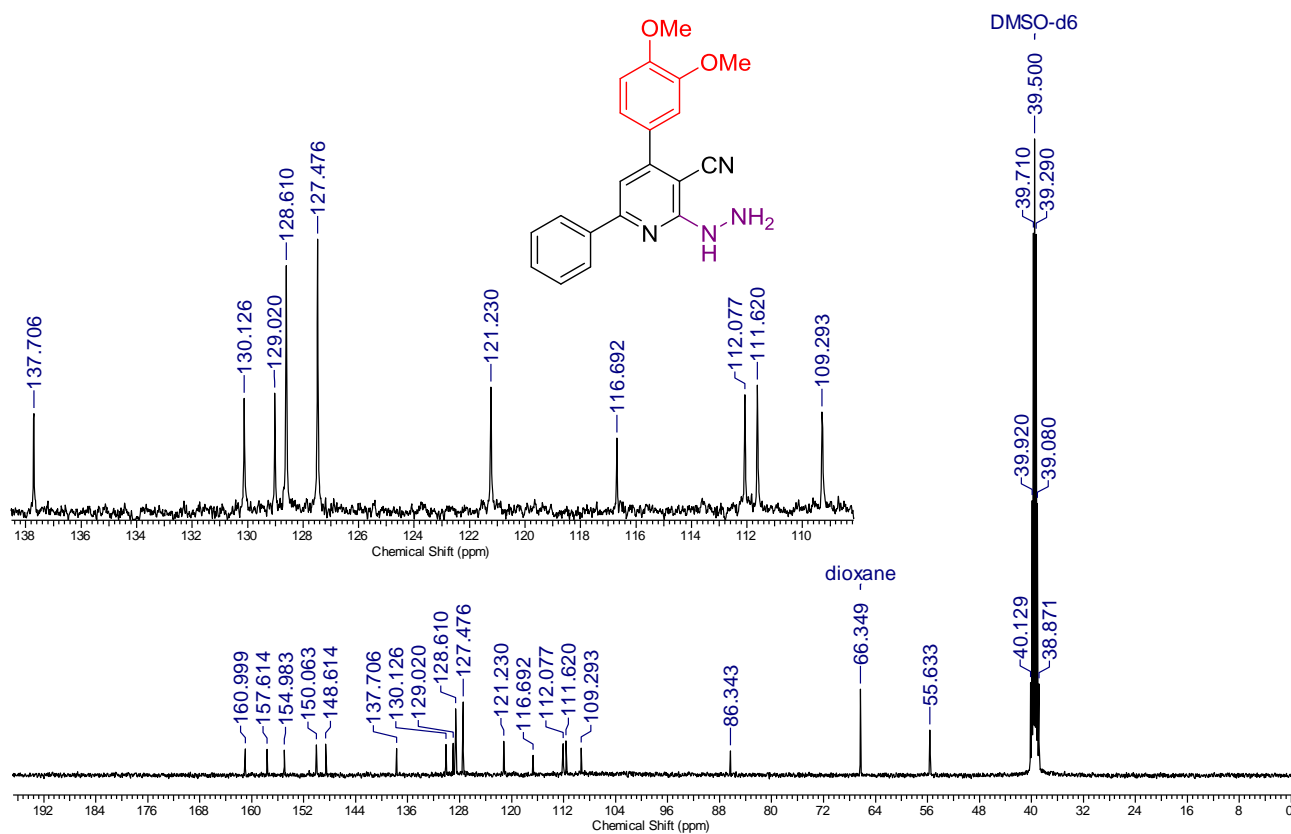

Figure S24. HRMS spectrum of 2-hydrazino-3-cyanopyridine 20d

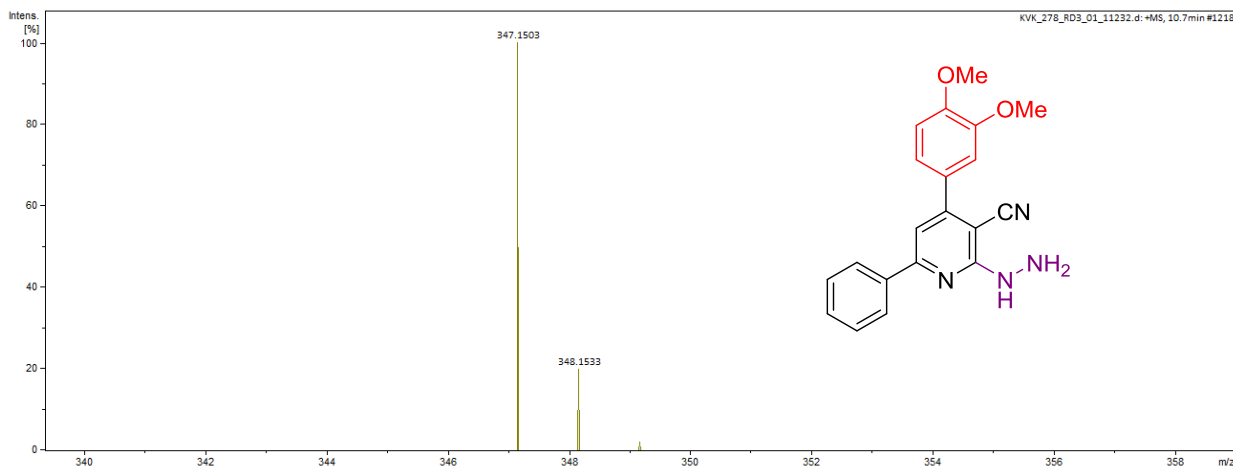



Figure S25. FTIR spectrum (nujol) of 2-hydrazino-3-cyanopyridine 20e

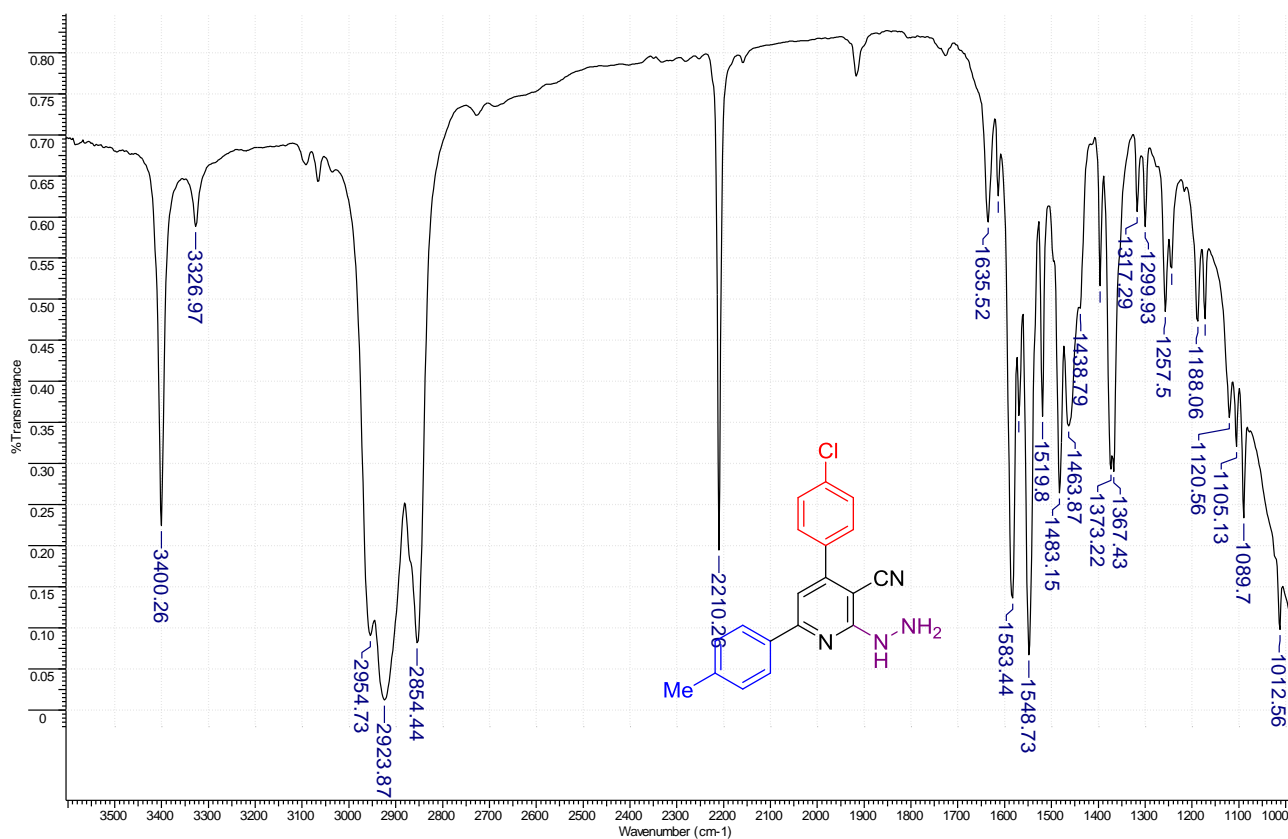

Figure S26. <sup>1</sup>H NMR spectrum of 2-hydrazino-3-cyanopyridine 20e, DMSO-d<sub>6</sub> (400 MHz)

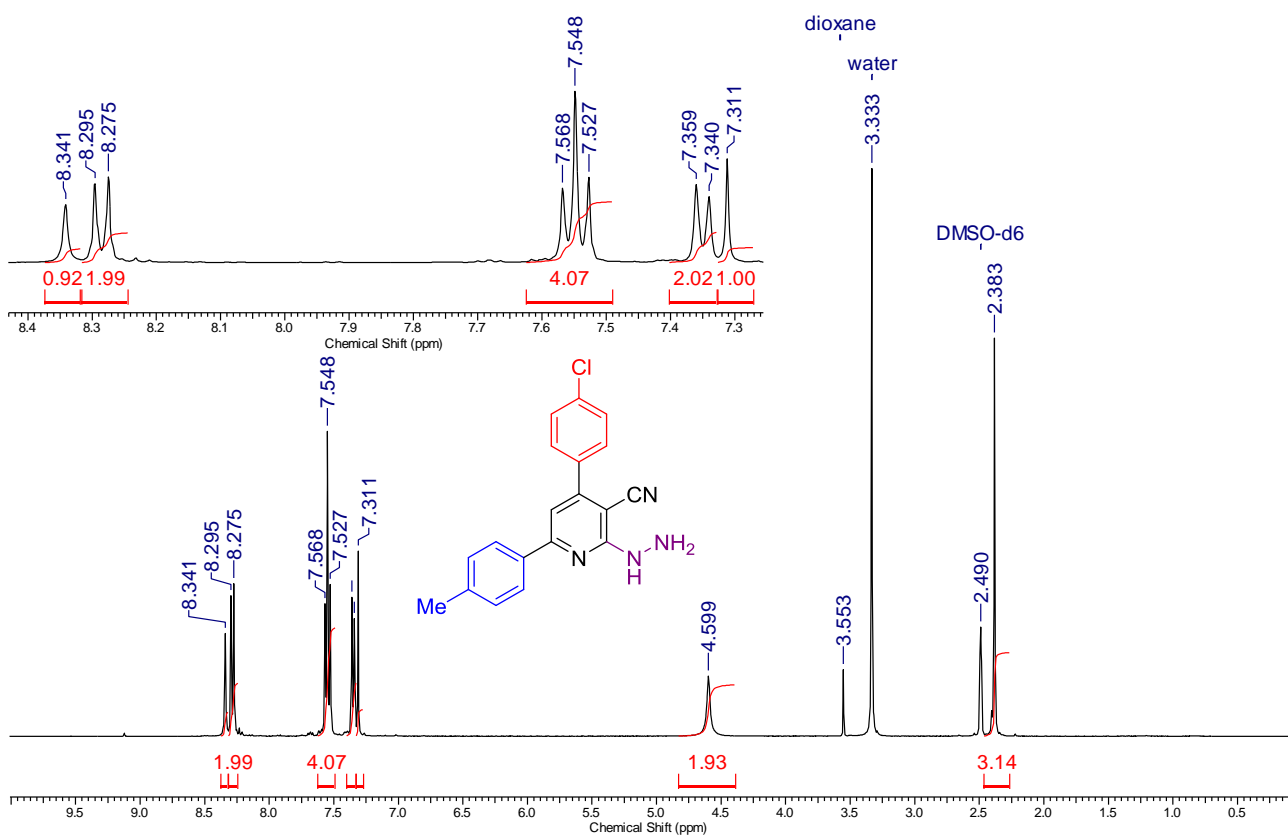

**Figure S27.**  $^{13}\text{C}$  NMR spectrum of 2-hydrazino-3-cyanopyridine 20e, DMSO- $d_6$  (101 MHz)

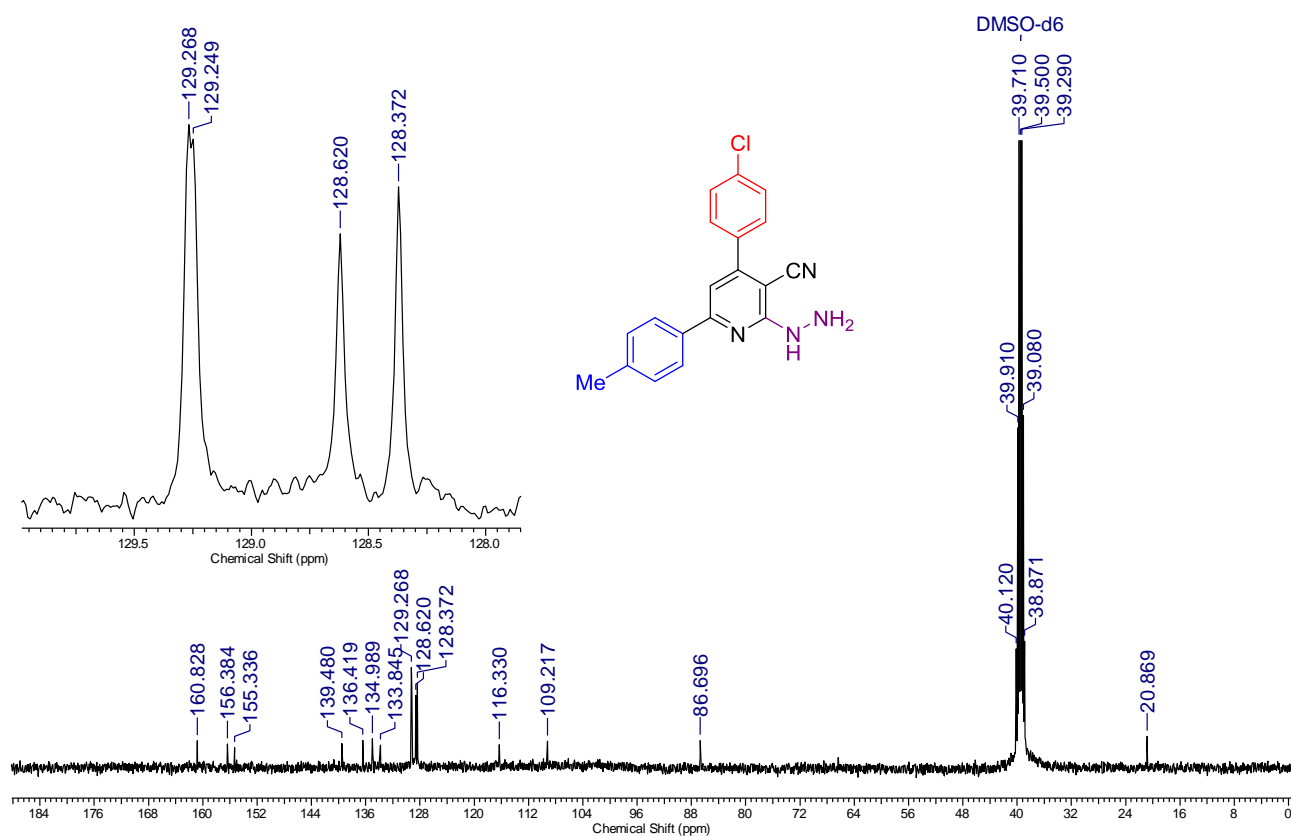

**Figure S28.** HRMS spectrum of 2-hydrazino-3-cyanopyridine 20e

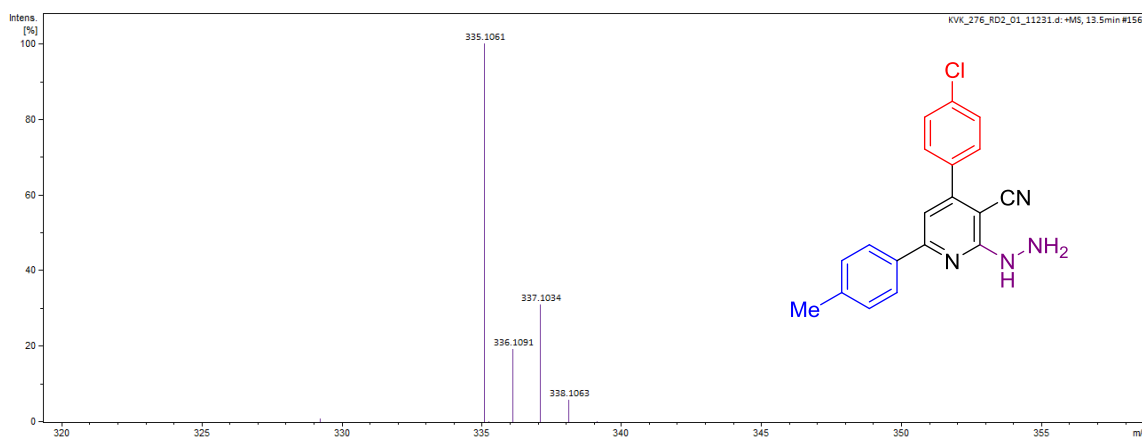

IR spectrum of compound 10. The x-axis represents Wavenumber (cm<sup>-1</sup>) from 3500 to 1000, and the y-axis represents % Transmittance from 0 to 0.70. The spectrum shows characteristic absorption bands for the compound, with peaks labeled at 3307.89, 3245.96, 3062.74, 2954.73, 2923.87, 2854.44, 2208.33, 1587.3, 1575.73, 1554.51, 1514.01, 1458.08, 1367.43, 1301.86, 1259.43, 1197.71, 1161.06, 1097.42, 1066.56, and 1234.35 cm<sup>-1</sup>. The chemical structure of 10 is shown as an inset: 2-amino-3-(4-fluorophenyl)-6-phenylpyridine-4-carbonitrile.

**Figure S31.  $^{13}\text{C}$  NMR spectrum of 2-hydrazino-3-cyanopyridine 20f, DMSO- $d_6$  (101 MHz)**

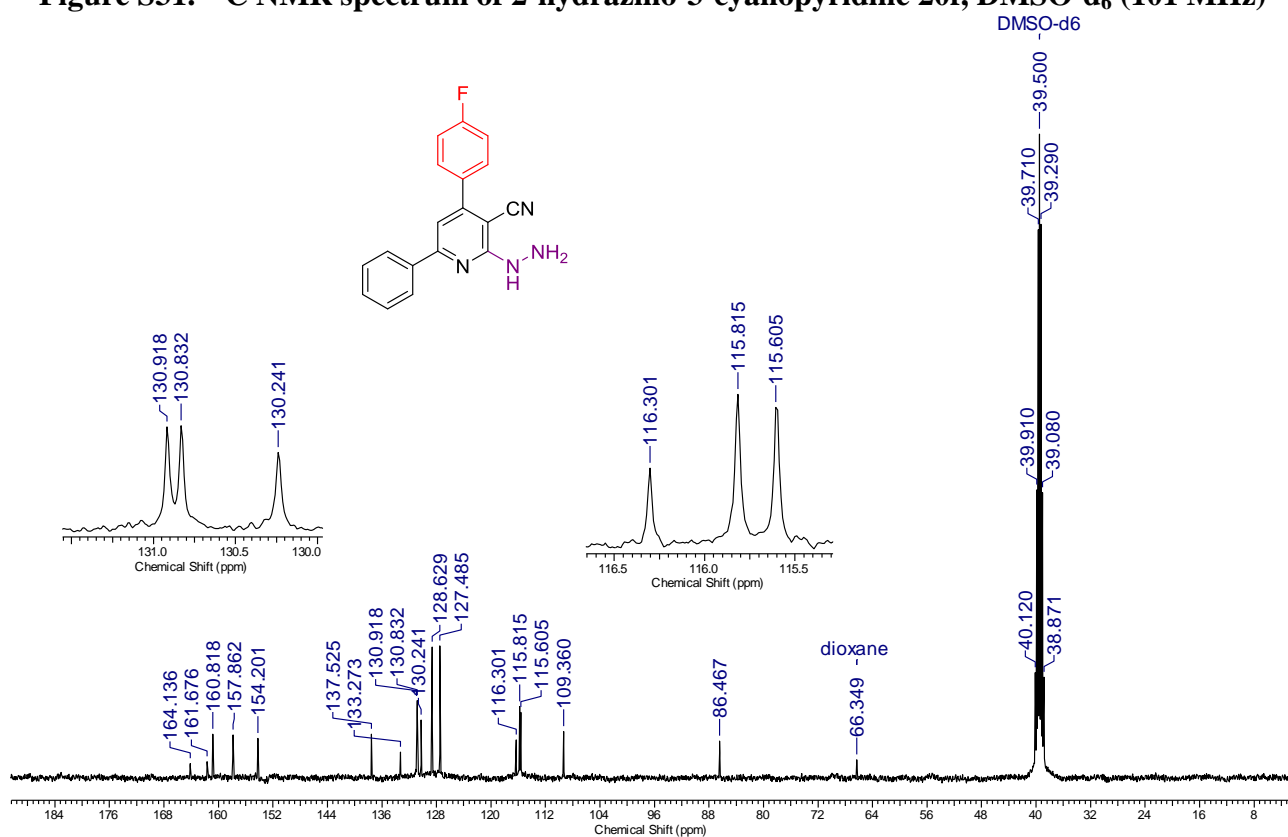

**Figure S32. HRMS spectrum of 2-hydrazino-3-cyanopyridine 20f**

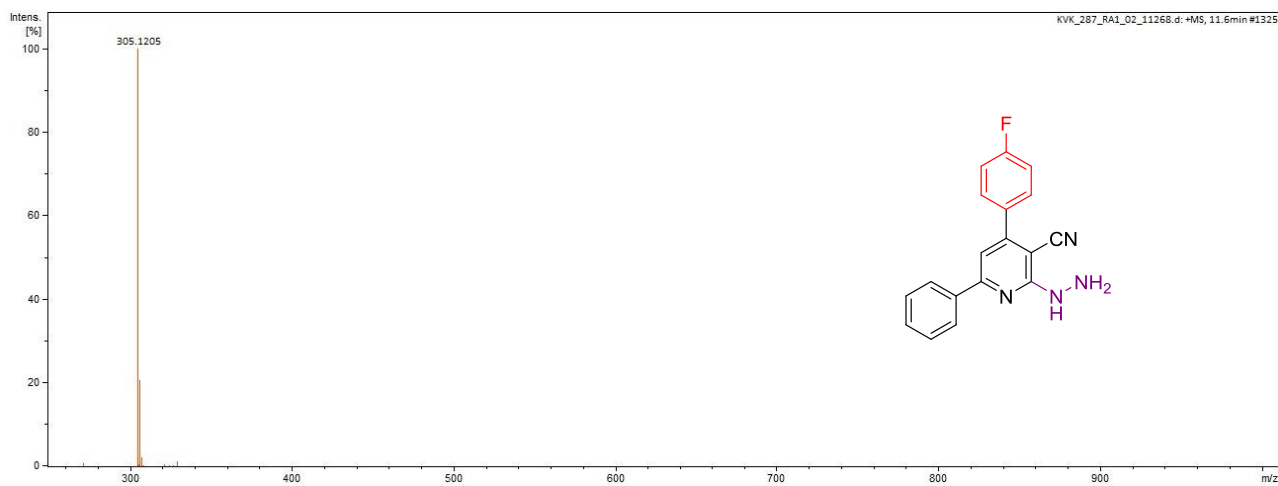

Figure S33: IR spectrum (KBr) of 2-hydrazino-5-cyanophenyl chloride **2g**.

Chemical structure of 2-hydrazino-5-cyanophenyl chloride **2g** is shown as an inset:

Nc1cc(C#N)c(Cl)cc1-c2ccccc2

Key IR peaks (Wavenumber in cm⁻¹):

| Wavenumber (cm⁻¹) |
|-------------------|
| 3307.68           |
| 3066.6            |
| 3245.96           |
| 2954.73           |
| 2923.87           |
| 2854.44           |
| 2210.26           |
| 1635.52           |
| 1591.16           |
| 1562.23           |
| 1550.66           |
| 1514.01           |
| 1458.08           |
| 1377.07           |
| 1427.22           |
| 1290.28           |
| 1257.5            |
| 1236.28           |
| 1122.49           |
| 1049.2            |
| 1029.91           |

Chemical structure of compound 10: Nc1nc(C2=CC=CC=C2)c3cc(Cl)cc(Cl)c3n1

<sup>1</sup>H NMR spectra of compound 10 in DMSO-d<sub>6</sub> and CDCl<sub>3</sub>.

**Top Spectrum (CDCl<sub>3</sub>):**

- Chemical Shift (ppm): 8.552, 8.217, 8.208, 8.201, 7.852, 7.846, 7.617, 7.597, 7.544, 7.490, 7.523, 7.482, 7.474, 7.263.
- Integration: 0.95, 1.96, 0.85, 1.00, 1.06, 0.95, 1.01.

**Bottom Spectrum (DMSO-d<sub>6</sub>):**

- Chemical Shift (ppm): 8.552, 8.217, 8.208, 8.201, 7.846, 7.597, 7.544, 7.490, 7.482, 7.474, 7.263, 4.616.
- Integration: 0.95, 1.96, 0.85, 2.95, 1.01, 1.99.

**Solvent Peaks:**

- CDCl<sub>3</sub>: 7.263 ppm (CHCl<sub>3</sub>), 3.553 ppm (water), 3.337 ppm (DMSO-d<sub>6</sub>).
- DMSO-d<sub>6</sub>: 2.490 ppm (DMSO-d<sub>6</sub>).

**Figure S35.  $^{13}\text{C}$  NMR spectrum of 2-hydrazino-3-cyanopyridine 20g, DMSO- $d_6$  (101 MHz)**

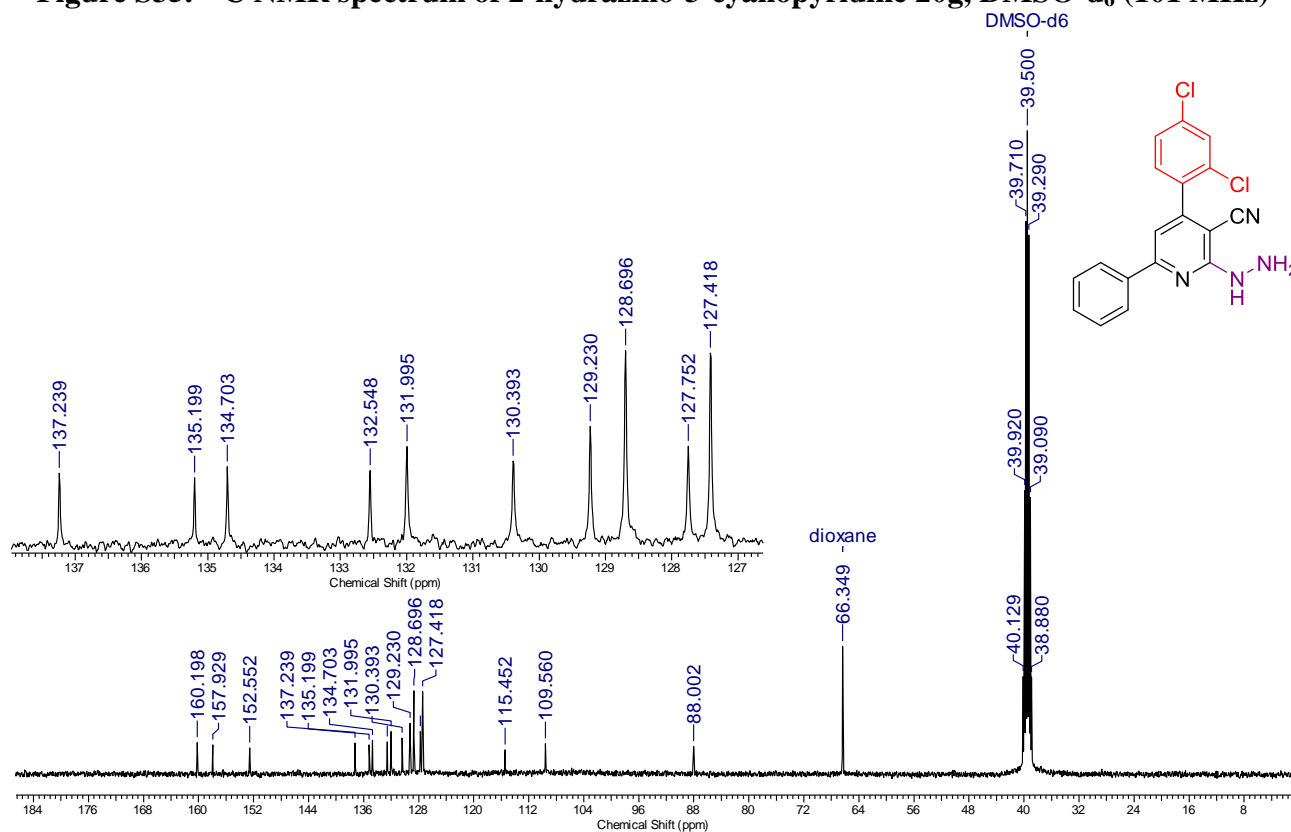

**Figure S36. HRMS spectrum of 2-hydrazino-3-cyanopyridine 20g**

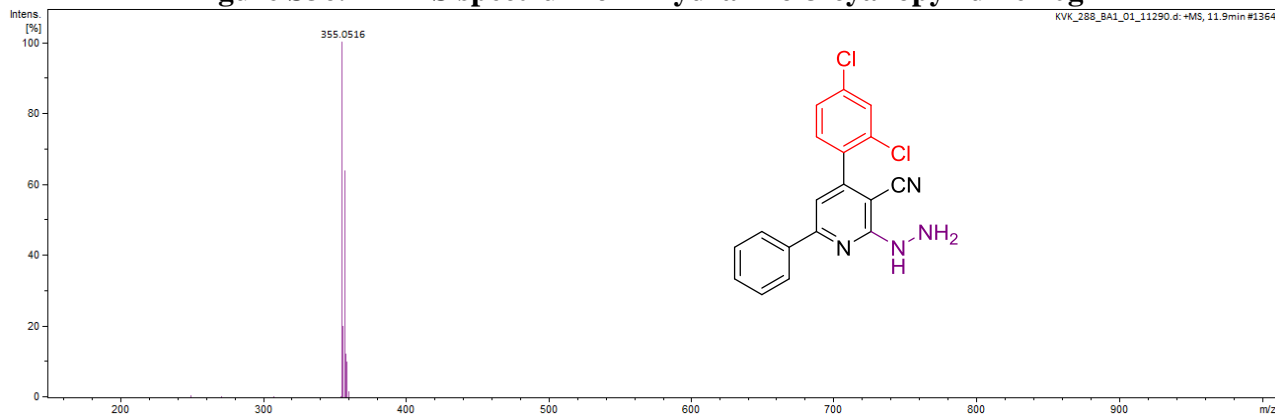

**Figure S37. HRMS spectrum of 2-hydrazino-3-cyanopyridine 20h**

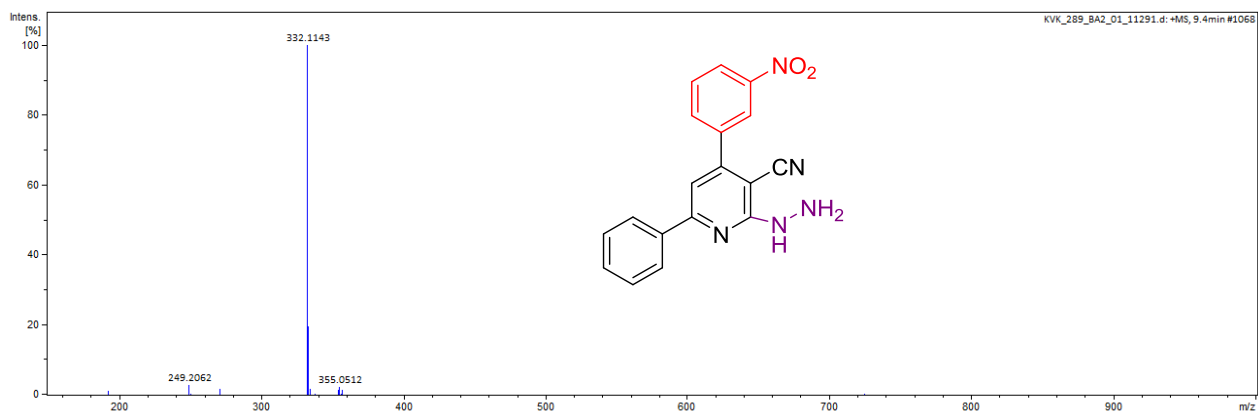

**Figure S38. FTIR spectrum (nujol) of 2-hydrazino-3-cyanopyridine 20h**

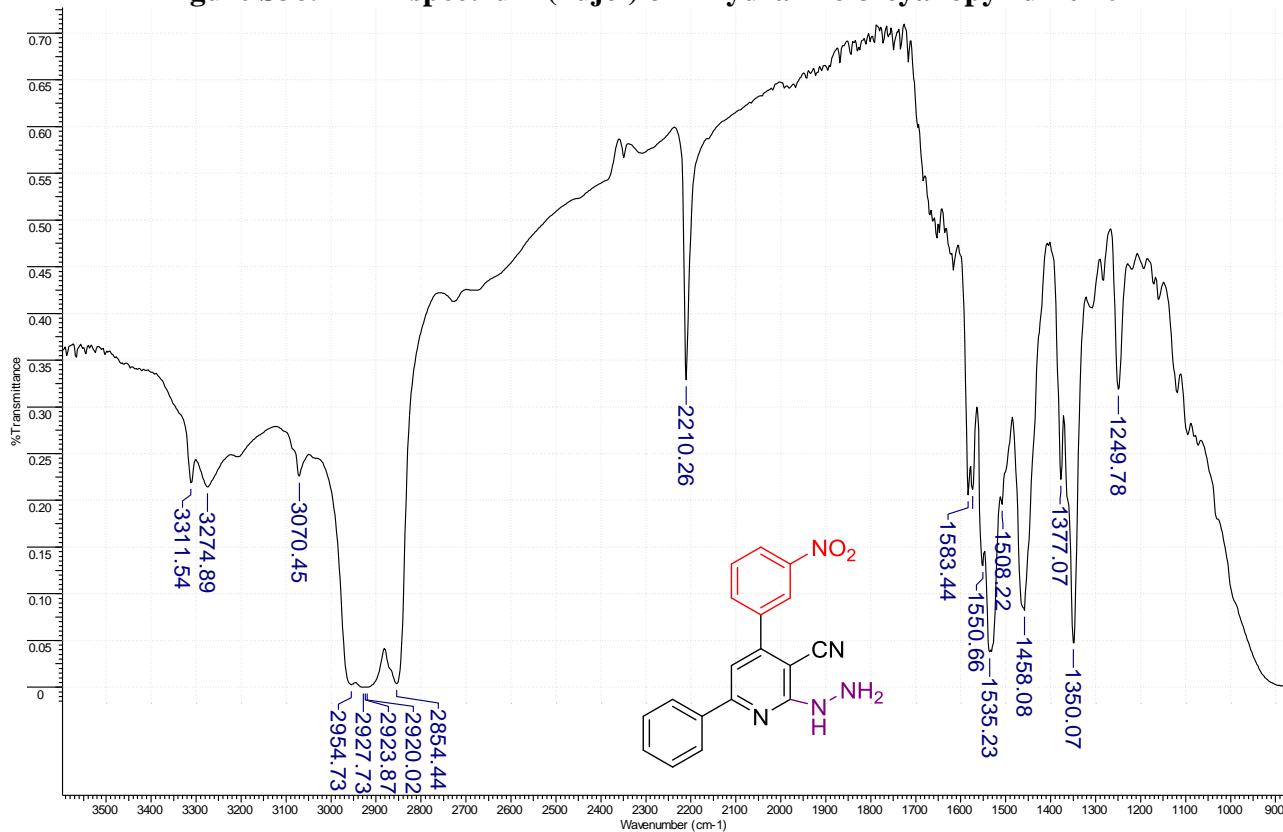

**Figure S39. FTIR spectrum (nujol) of 2-hydrazino-3-cyanopyridine 20i**

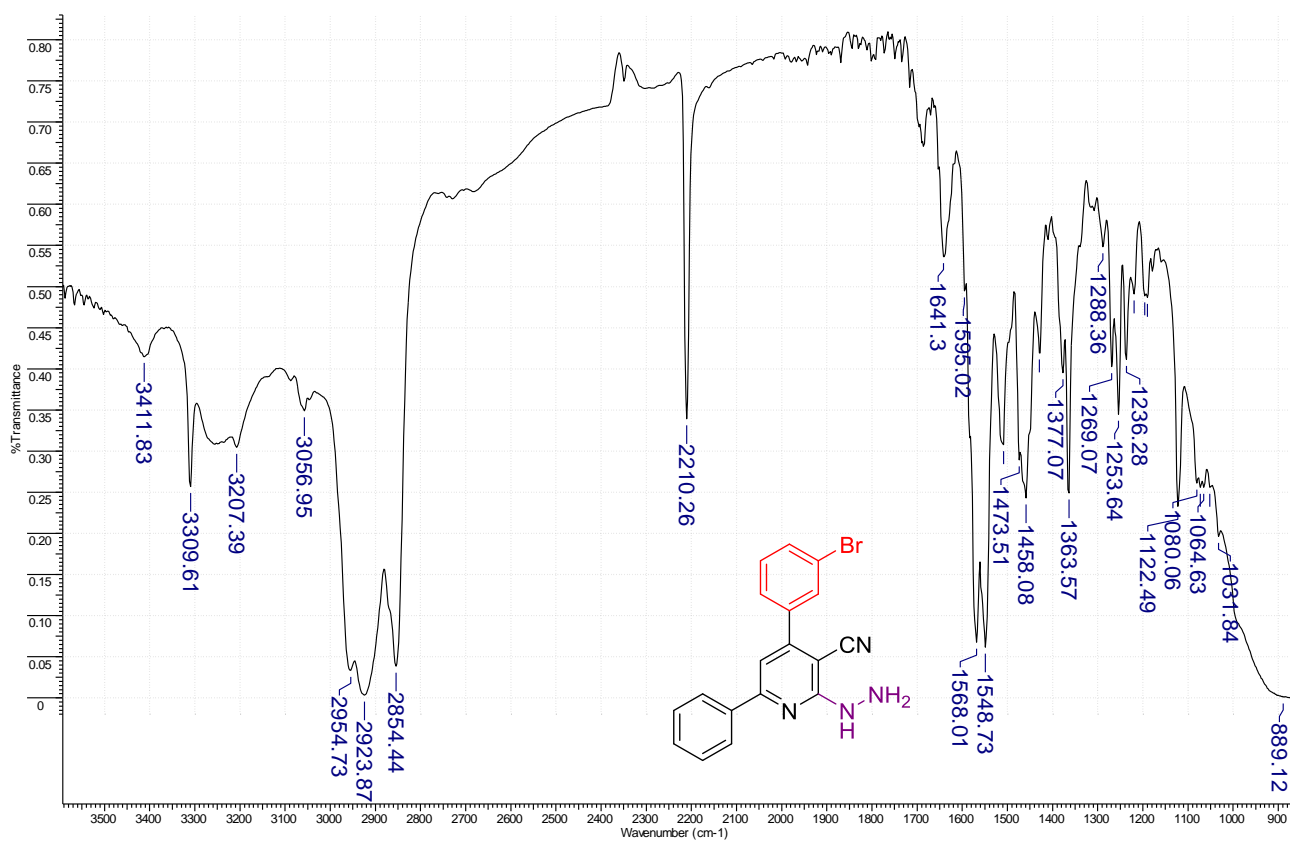

Figure S40. HRMS spectrum of 2-hydrazino-3-cyanopyridine 20i

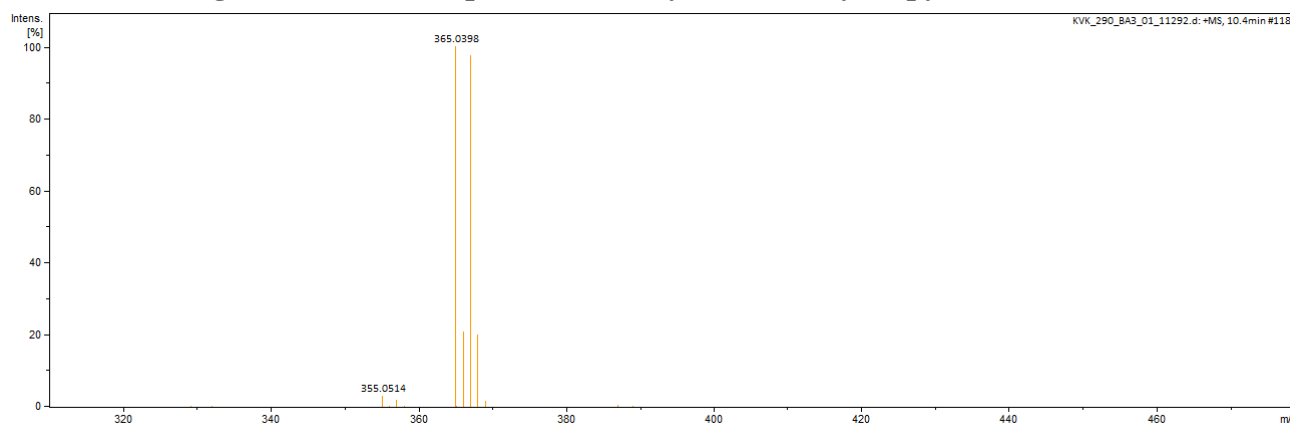

Figure S41. FTIR spectrum (nujol) of 2-hydrazino-3-cyanopyridine 20j

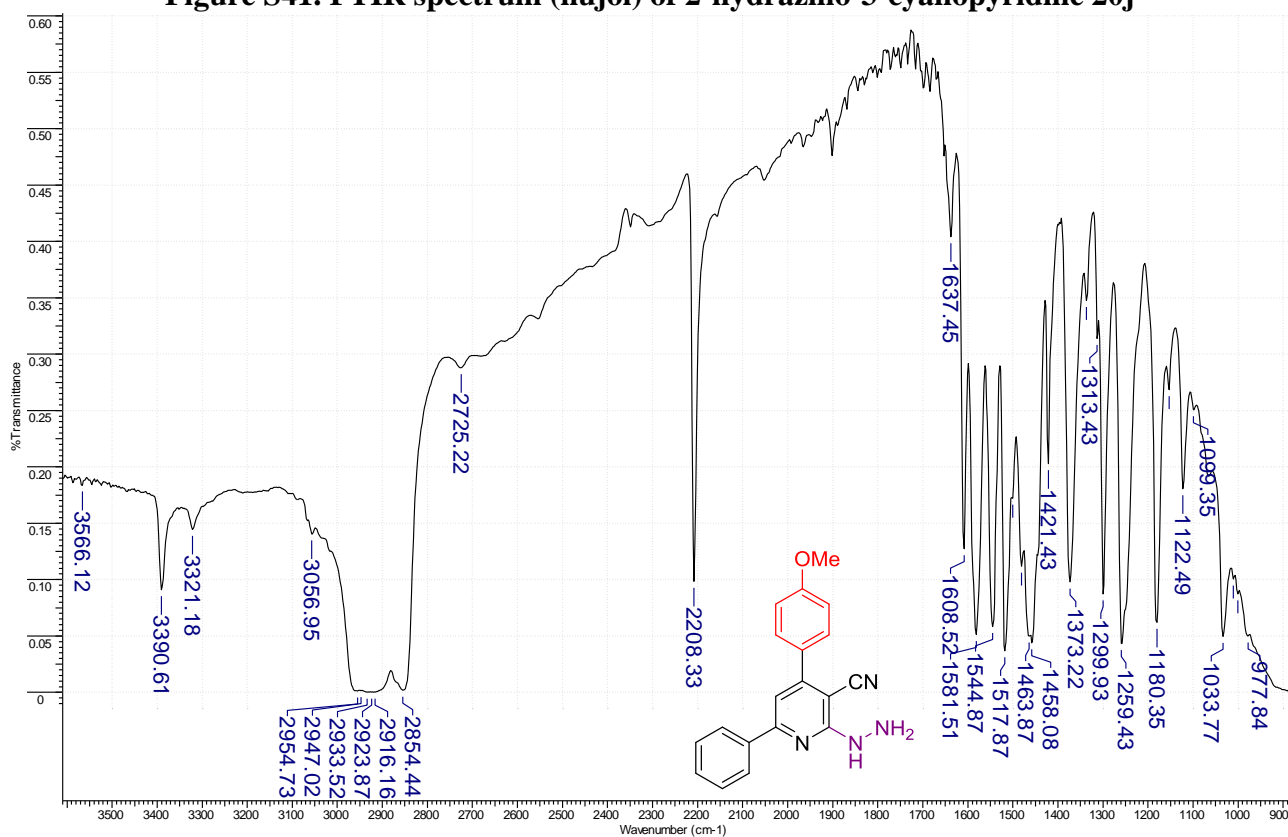

Figure S42. HRMS spectrum of 2-hydrazino-3-cyanopyridine 20j

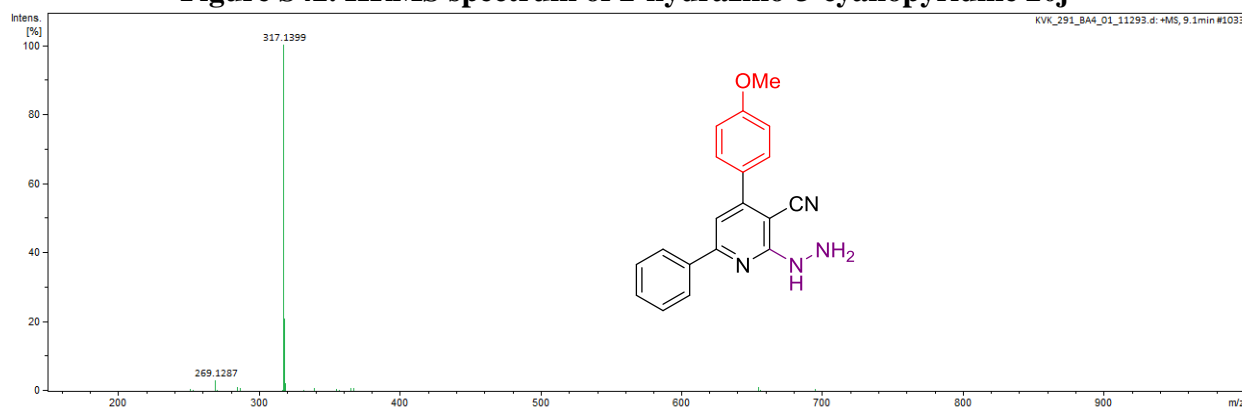



Figure S43.  $^1\text{H}$  NMR spectrum of 2-hydrazino-3-cyanopyridine 20j, DMSO- $\text{d}_6$  (400 MHz)

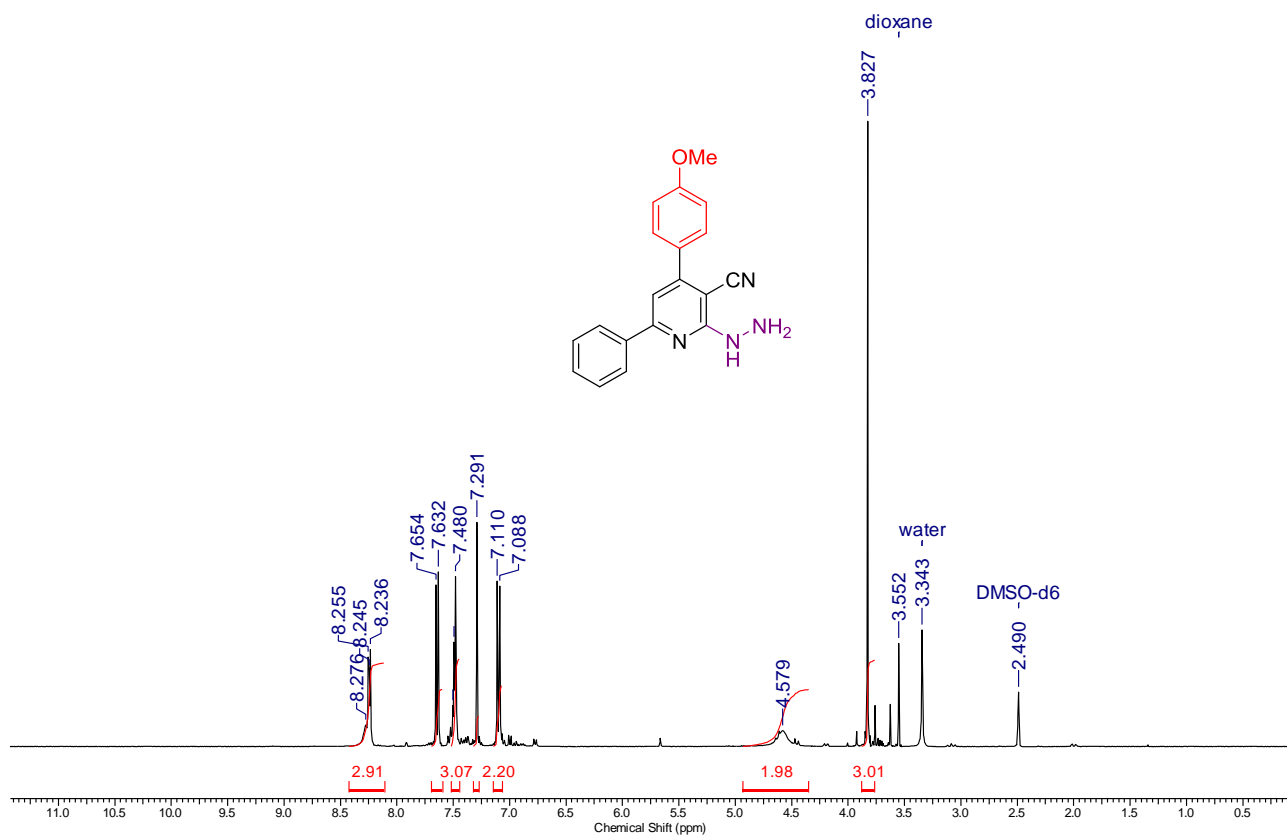

Figure S44.  $^{13}\text{C}$  NMR spectrum of 2-hydrazino-3-cyanopyridine 20j, DMSO- $\text{d}_6$  (101 MHz)

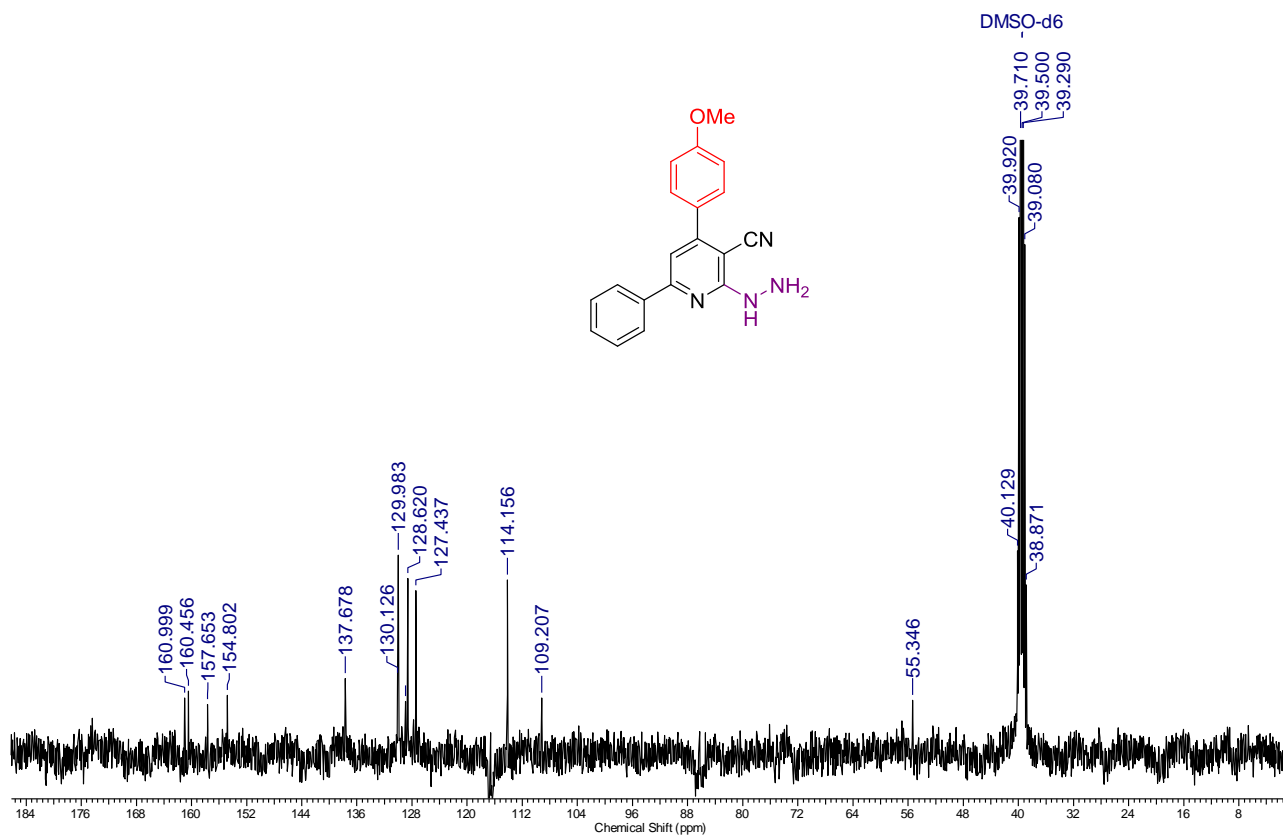

Figure S45. FTIR spectrum (nujol) of hydrazone 21{I}

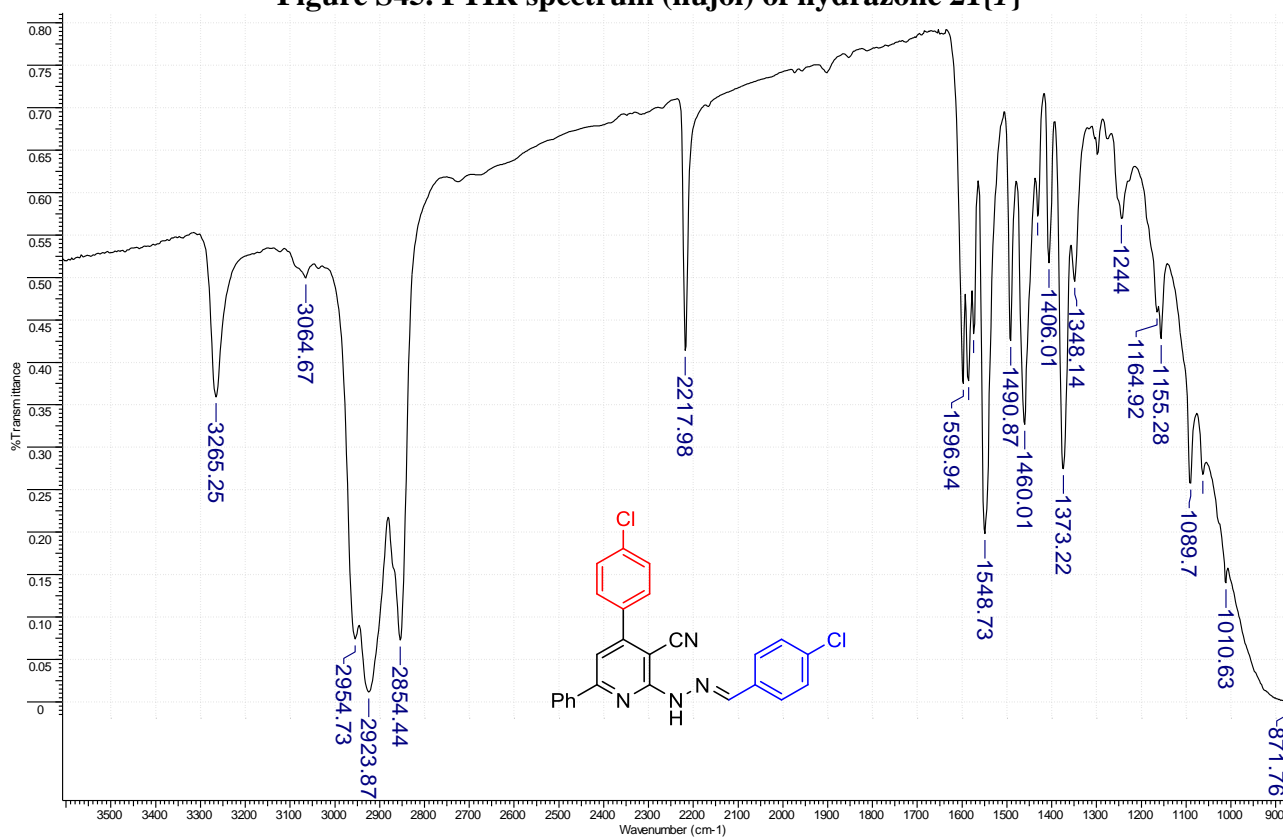

Figure S46. <sup>1</sup>H NMR spectrum of hydrazone 21{I}, DMSO-d<sub>6</sub> (400 MHz)

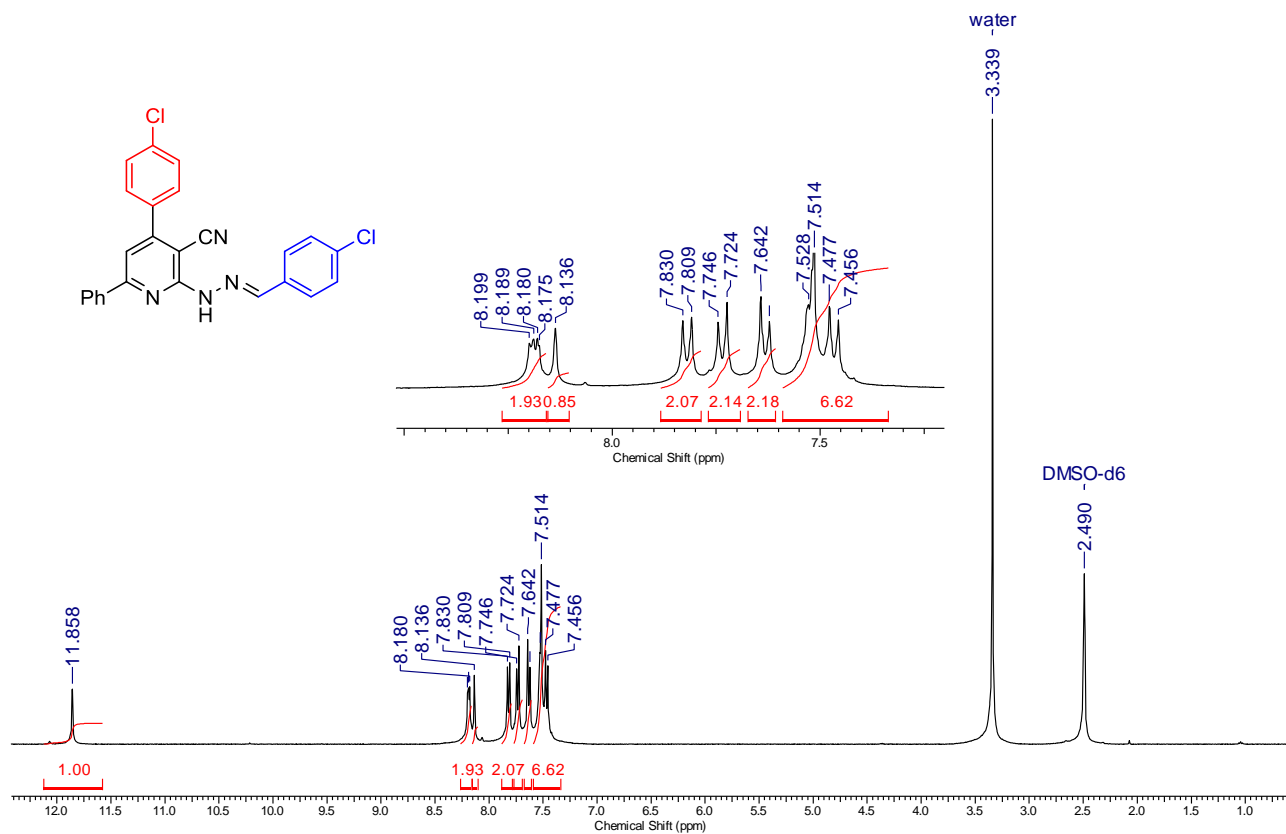

**Figure S47. HRMS spectrum of hydrazone 21{1}**

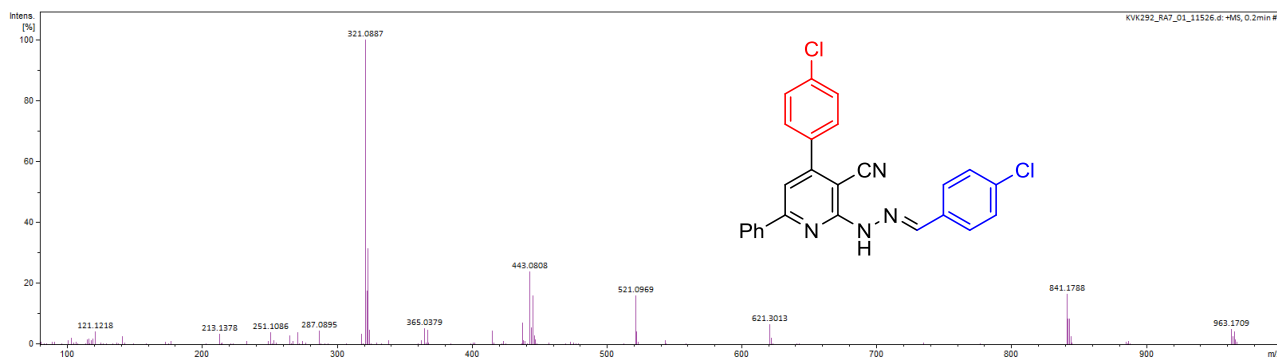

**Figure S48. FTIR spectrum (nujol) of hydrazone 21{3}**

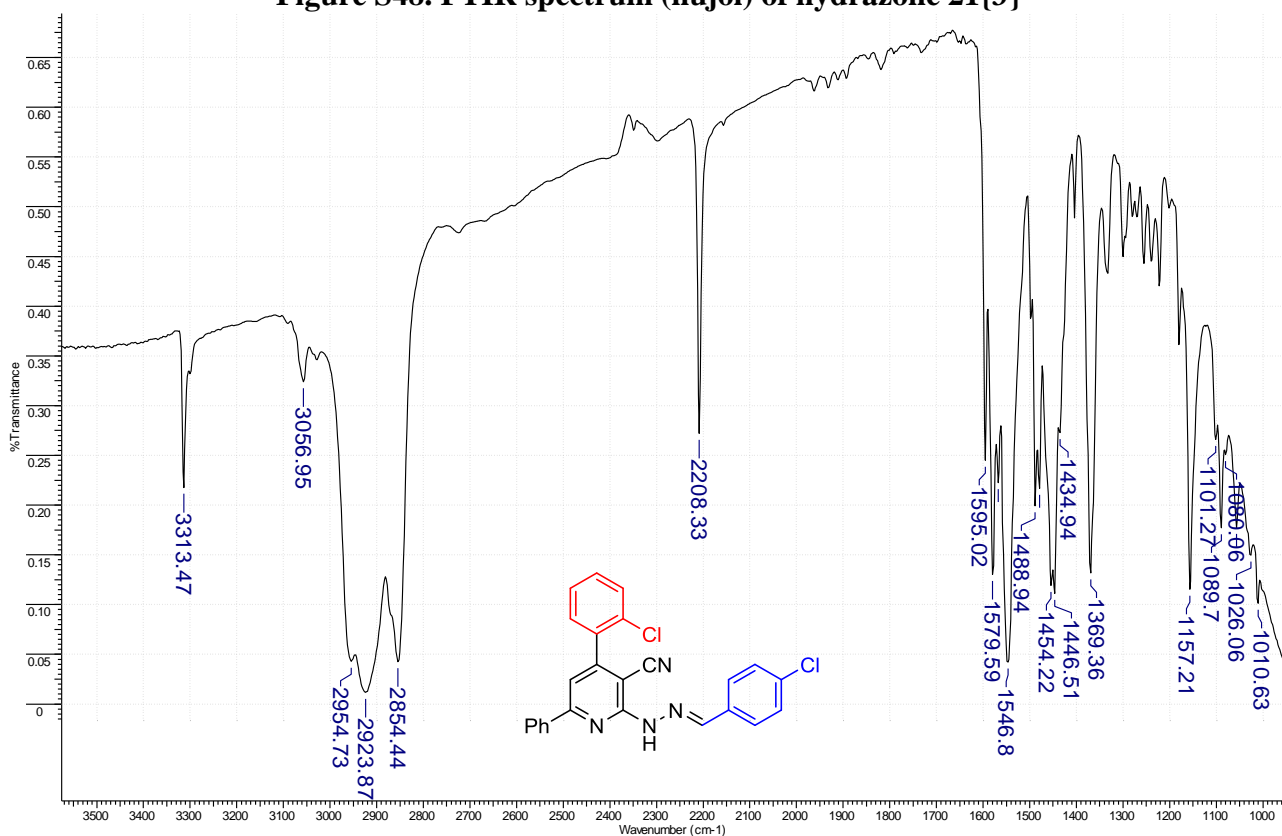

**Figure S49. HRMS spectrum of hydrazone 21{3}**

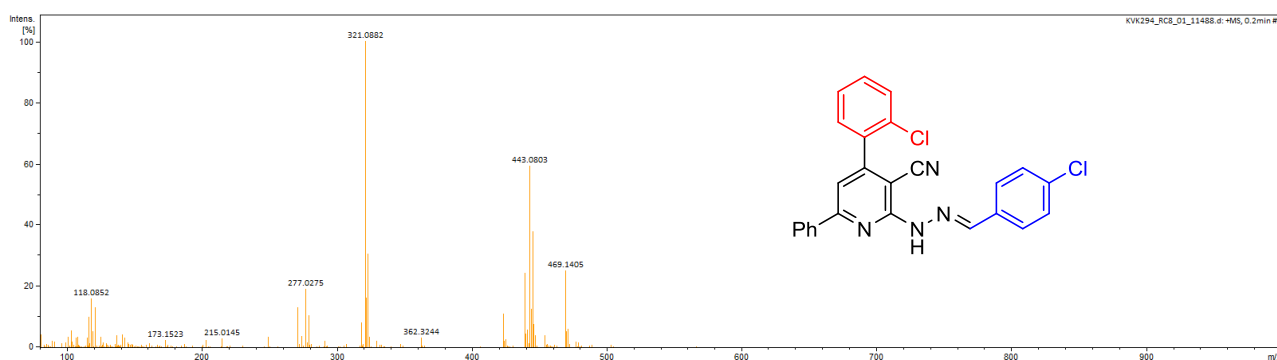

Figure S50.  $^1\text{H}$  NMR spectrum of hydrazone 21{3}, DMSO- $\text{d}_6$  (400 MHz)

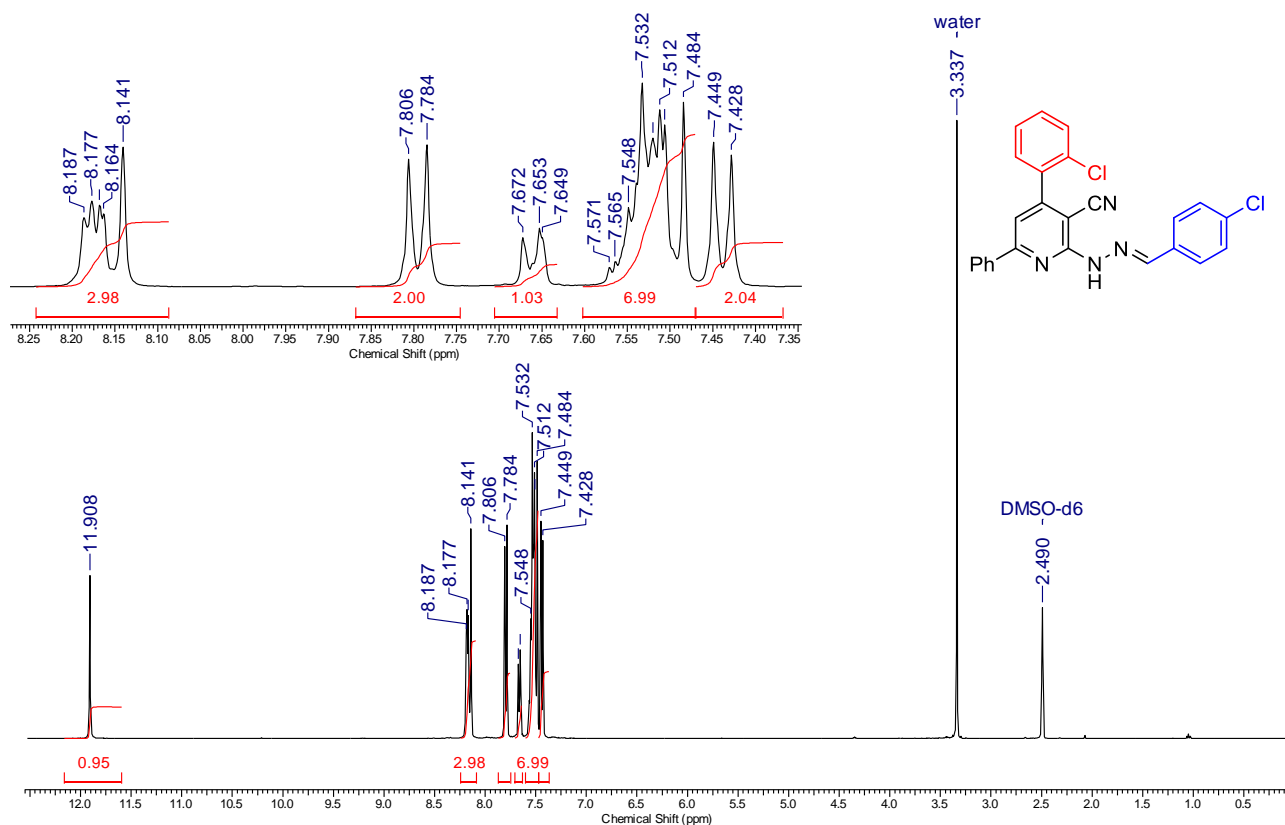

Figure S51.  $^{13}\text{C}$  NMR spectrum of hydrazone 21{3}, DMSO- $\text{d}_6$  (101 MHz)

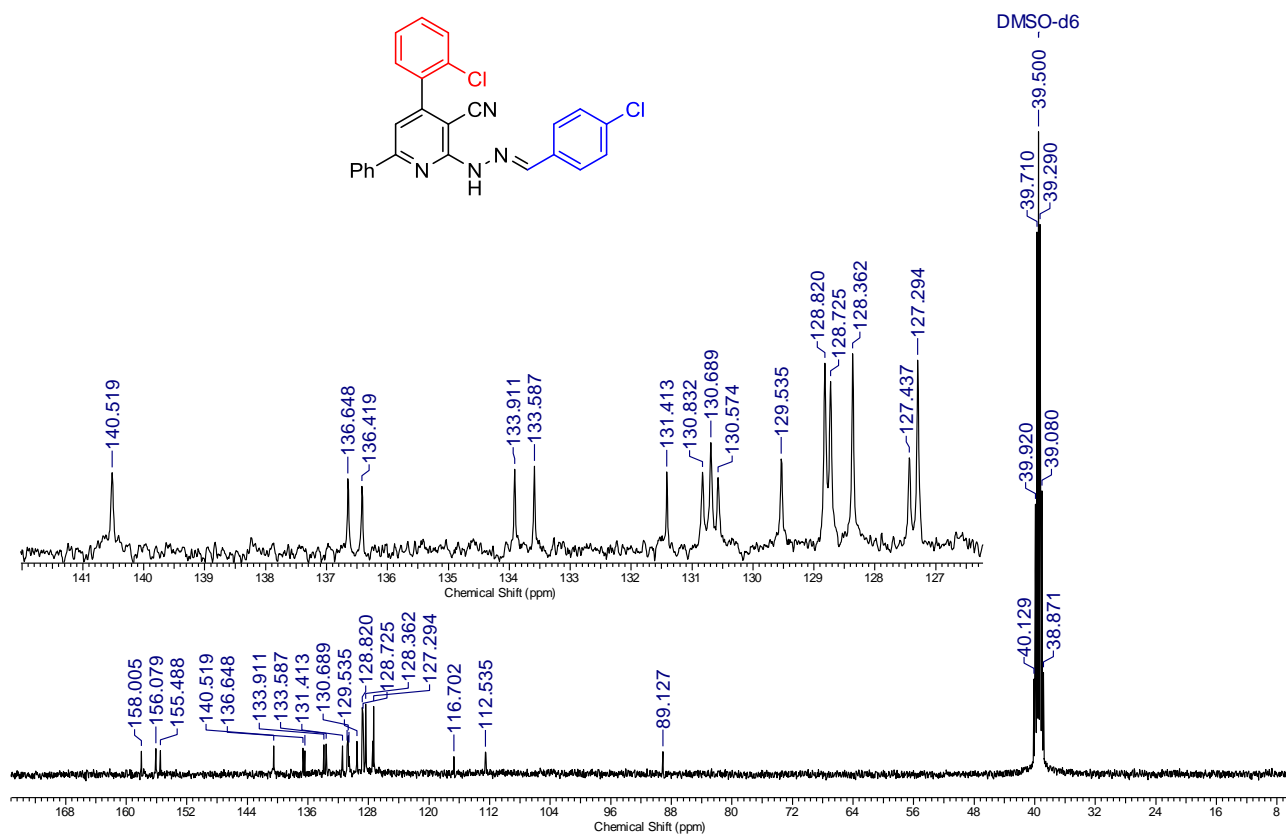

Figure S32: FTIR spectrum (major) of hydrazone 21a. The spectrum shows transmittance (%) versus wavenumber (cm<sup>-1</sup>). The chemical structure of hydrazone 21a is shown below the spectrum.

Chemical structure of hydrazone 21a:

O=C1C(=NN1C2=CC=CC=C2)C(=N)N=C3C(=CC(=C3)Cl)Cl

Key IR peaks (cm<sup>-1</sup>):

| Wavenumber (cm <sup>-1</sup> ) |
|--------------------------------|
| 3298.04                        |
| 3089.74                        |
| 3056.95                        |
| 2954.73                        |
| 2923.87                        |
| 2854.44                        |
| 2214.12                        |
| 1595.02                        |
| 1579.59                        |
| 1544.87                        |
| 1481.22                        |
| 1467.72                        |
| 1446.51                        |
| 1367.43                        |
| 1334.64                        |
| 1263.28                        |
| 1218.92                        |
| 1155.28                        |
| 1099.35                        |
| 1049.2                         |
| 1027.98                        |
| 921.91                         |
| 871.76                         |

Chemical structure of compound 10 is shown as an inset. The structure is a pyrimidine derivative with a 2-chlorophenyl group at position 6, a cyano group at position 4, and a 4-chlorophenyl group at position 2. The chemical structure is labeled with 'Ph' and 'CN'.

Figure S54.  $^{13}\text{C}$  NMR spectrum of hydrazone 21{4}, DMSO- $d_6$  (101 MHz)

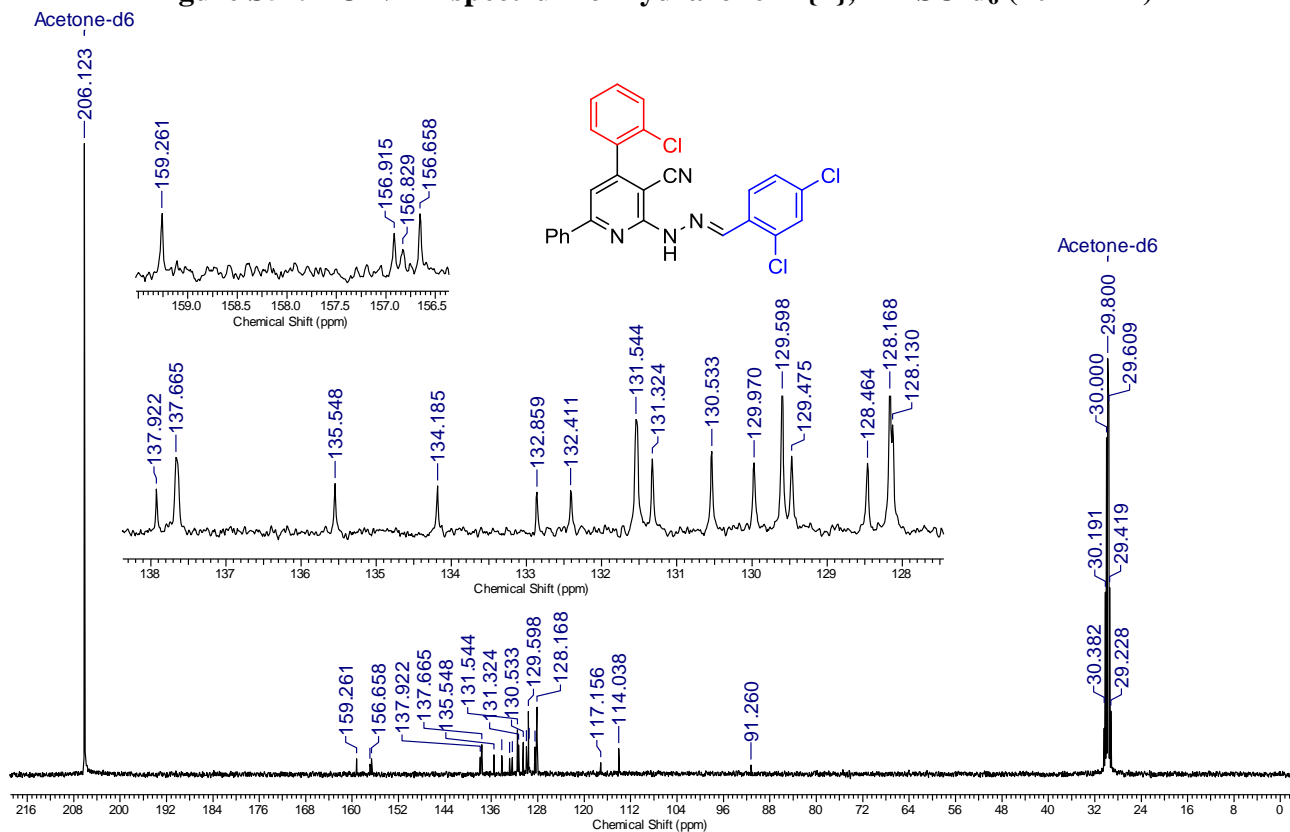

Figure S55. HRMS spectrum of hydrazone 21{4}

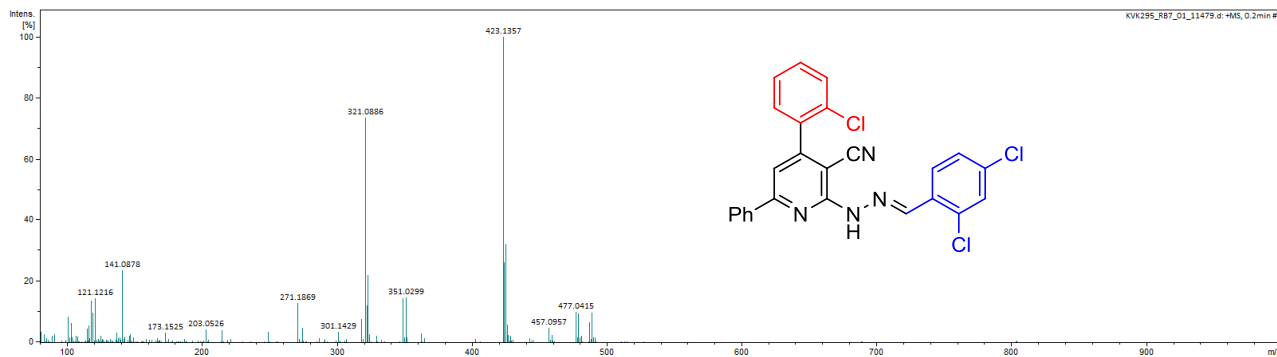

Figure S56. HRMS spectrum of hydrazone 21{5}

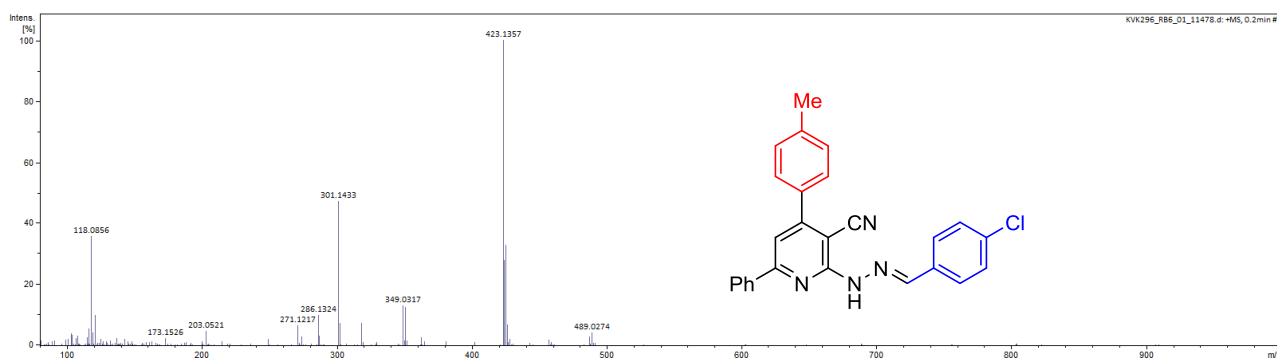

Figure S57. FTIR spectrum (nujol) of hydrazone 21{5}

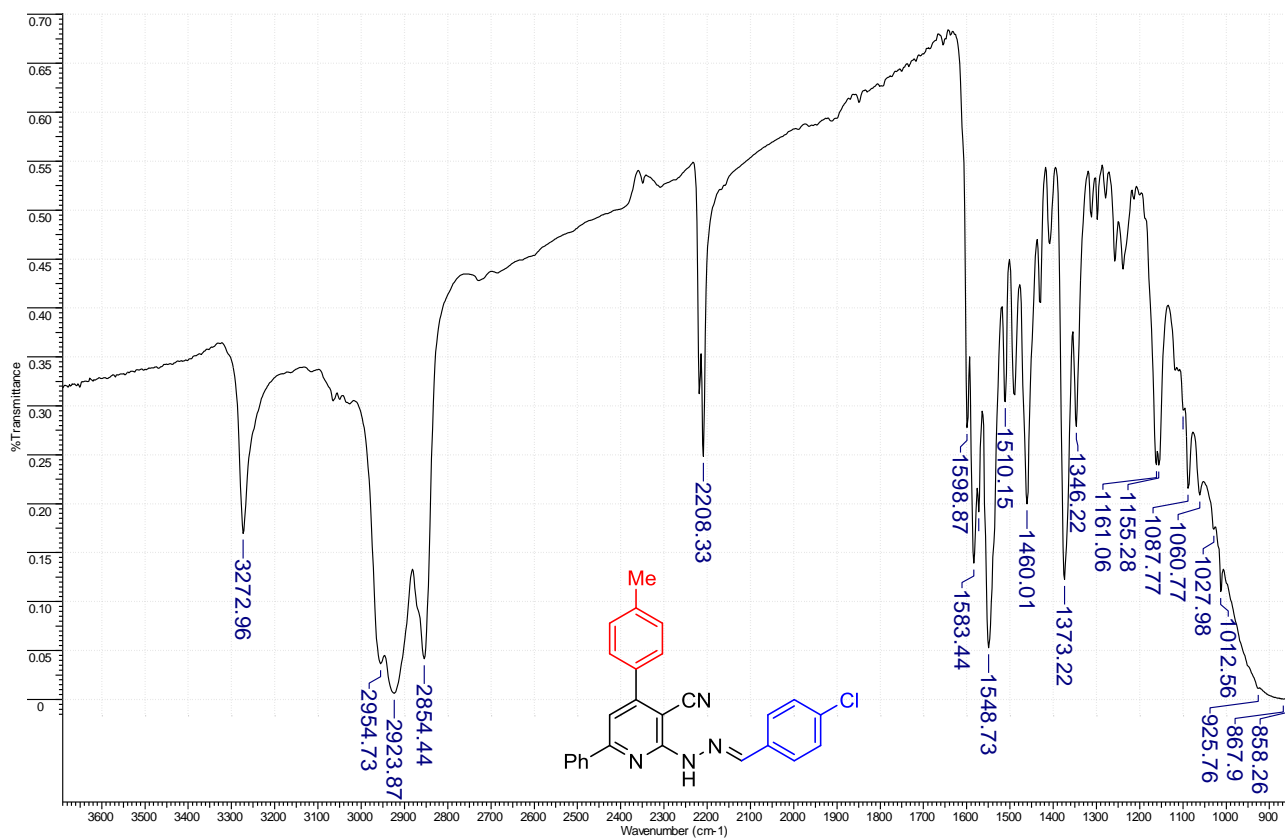

Figure S58. FTIR spectrum (nujol) of hydrazone 21{6}

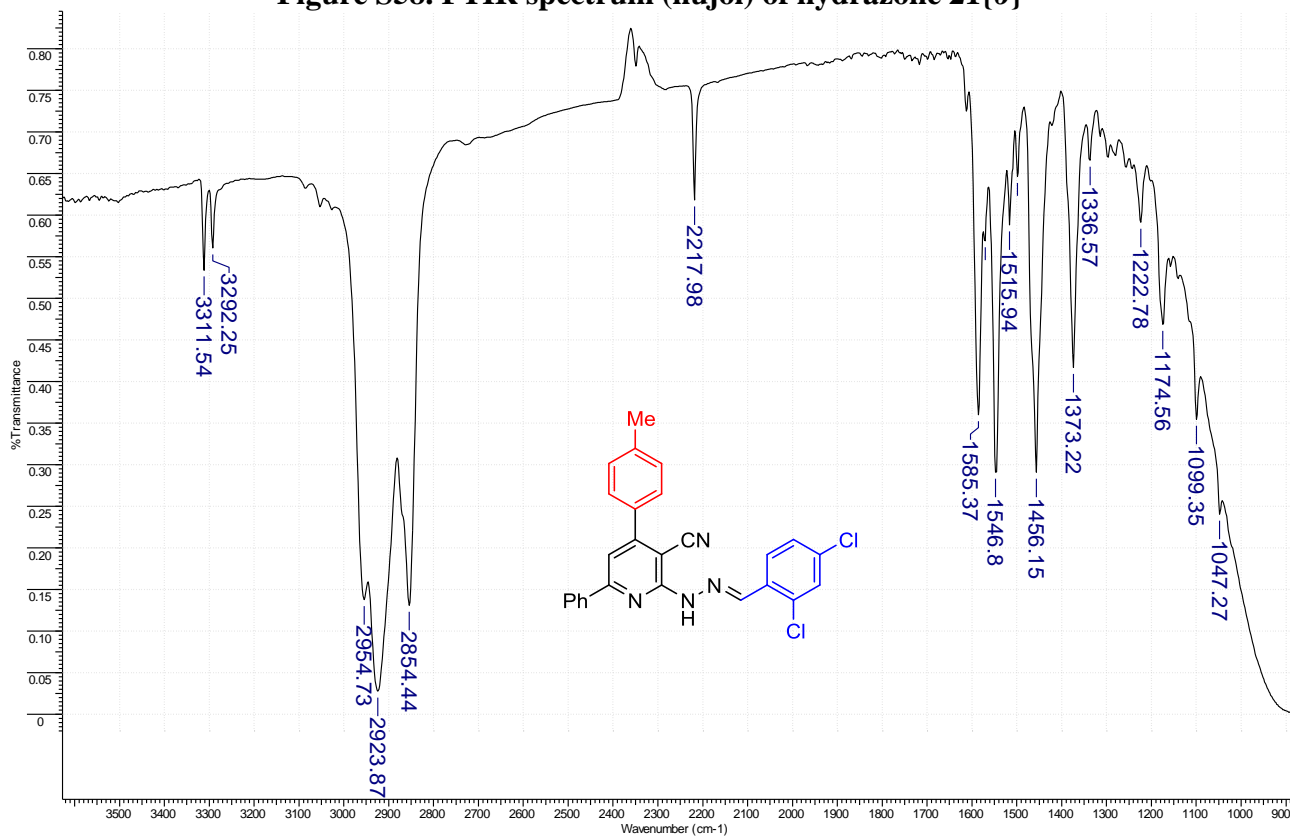

Figure S59.  $^1\text{H}$  NMR spectrum of hydrazone 21{6}, DMSO- $\text{d}_6$  (400 MHz)

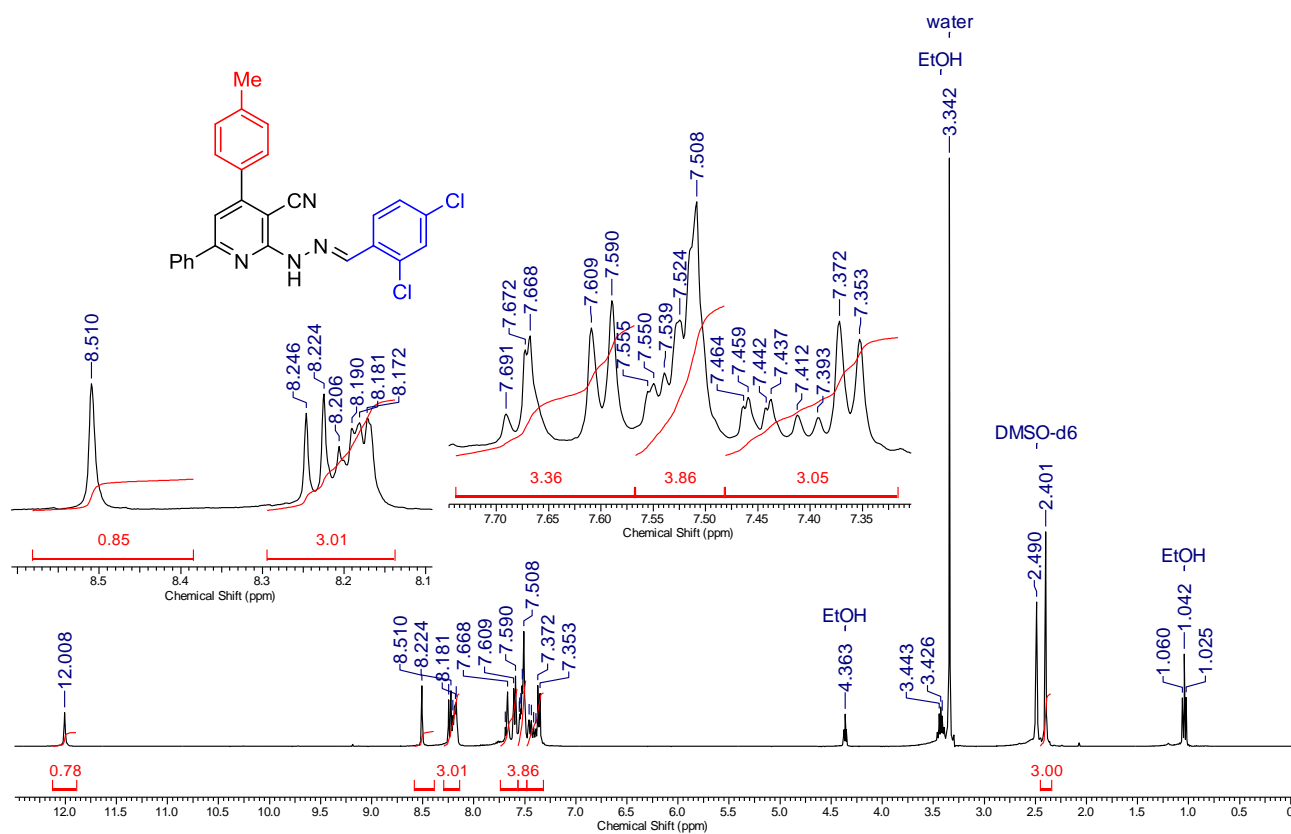

Figure S60. HRMS spectrum of hydrazone 21{6}

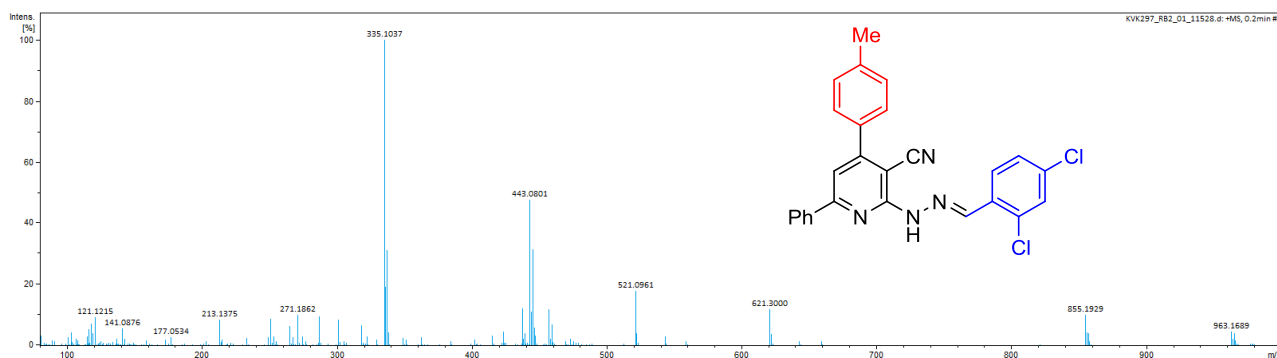



Figure S61. FTIR spectrum (nujol) of hydrazone 21{7}

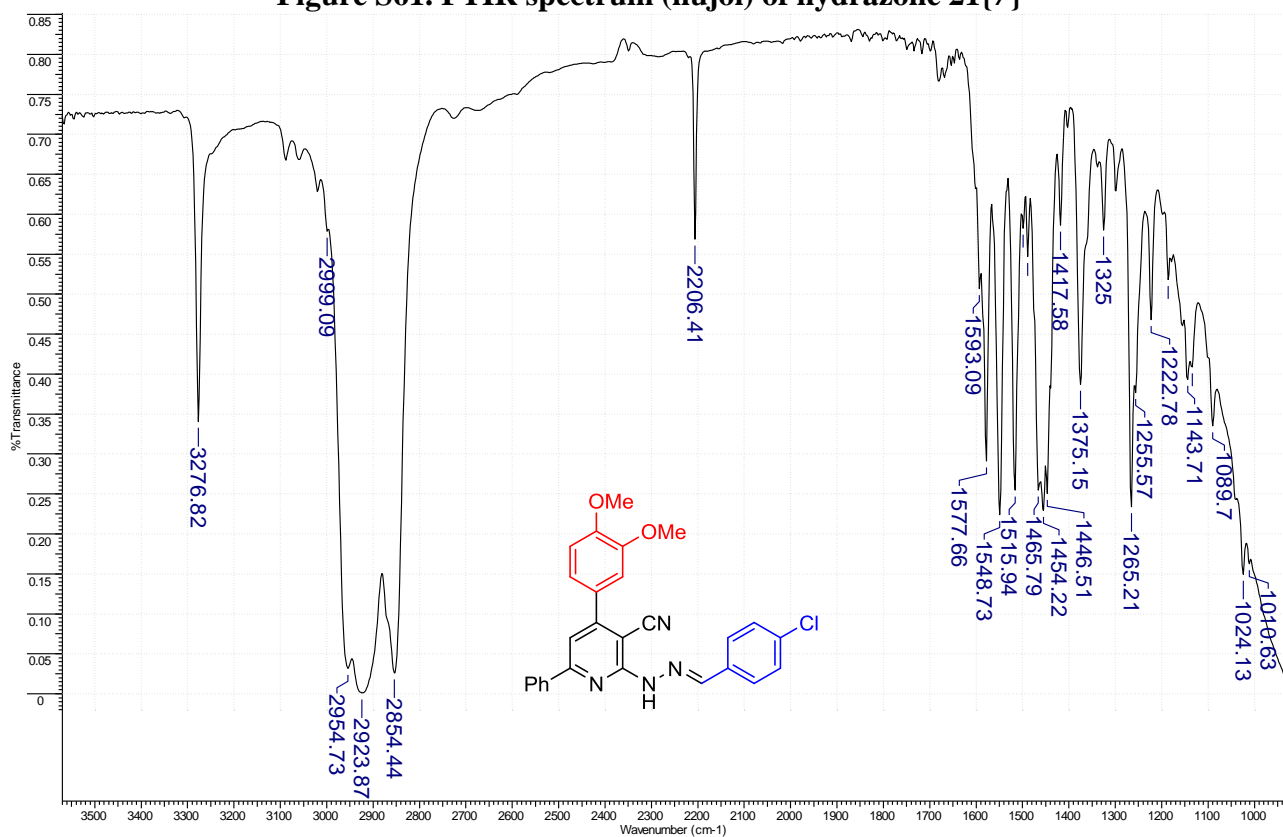

Figure S62. <sup>1</sup>H NMR spectrum of hydrazone 21{7}, DMSO-d<sub>6</sub> (400 MHz)

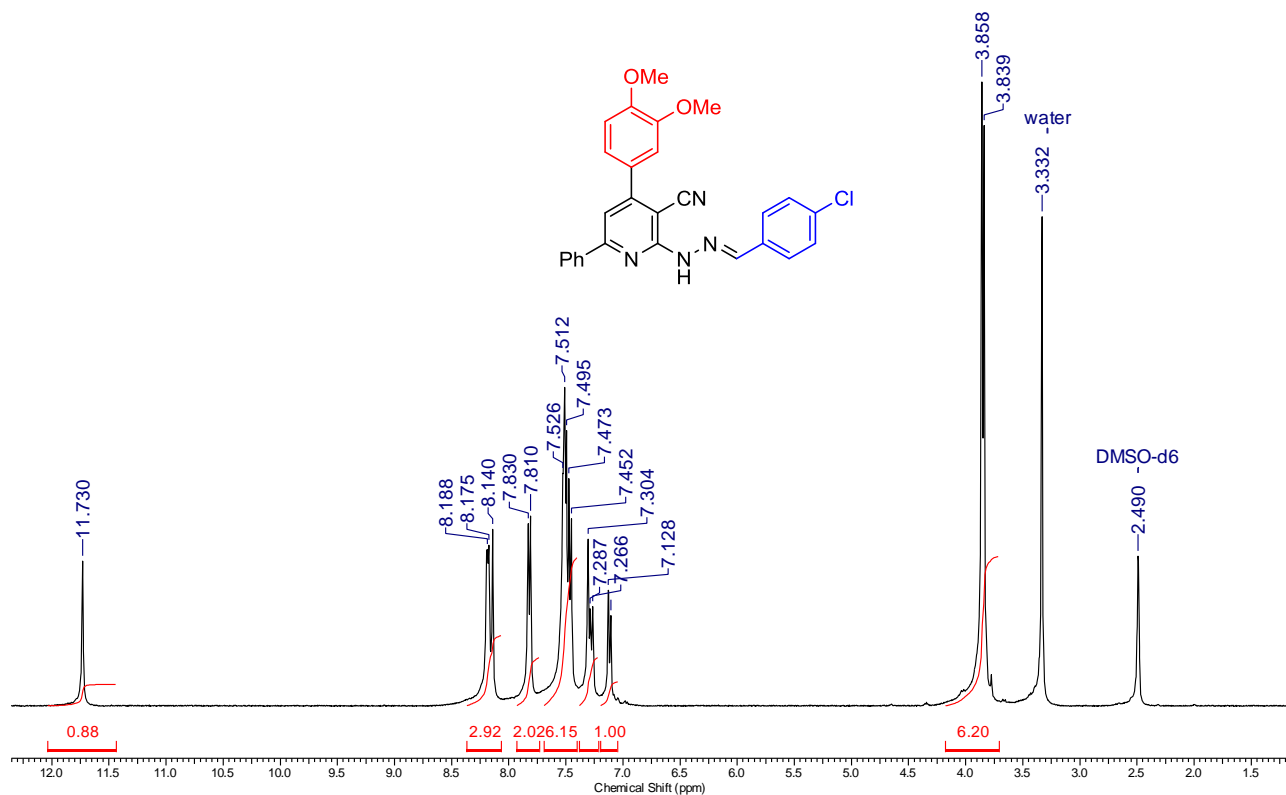

**Figure S63. HRMS spectrum of hydrazone 21{7}**

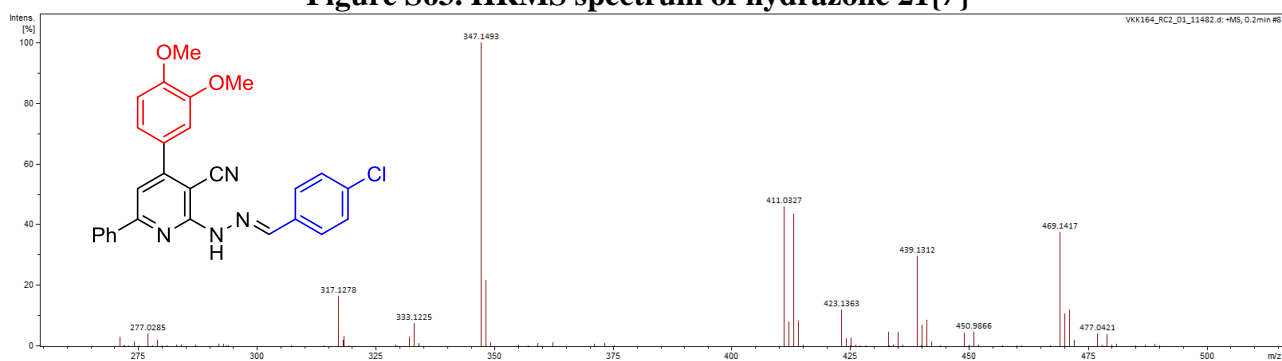

**Figure S64. FTIR spectrum (nujol) of hydrazone 21{8}**

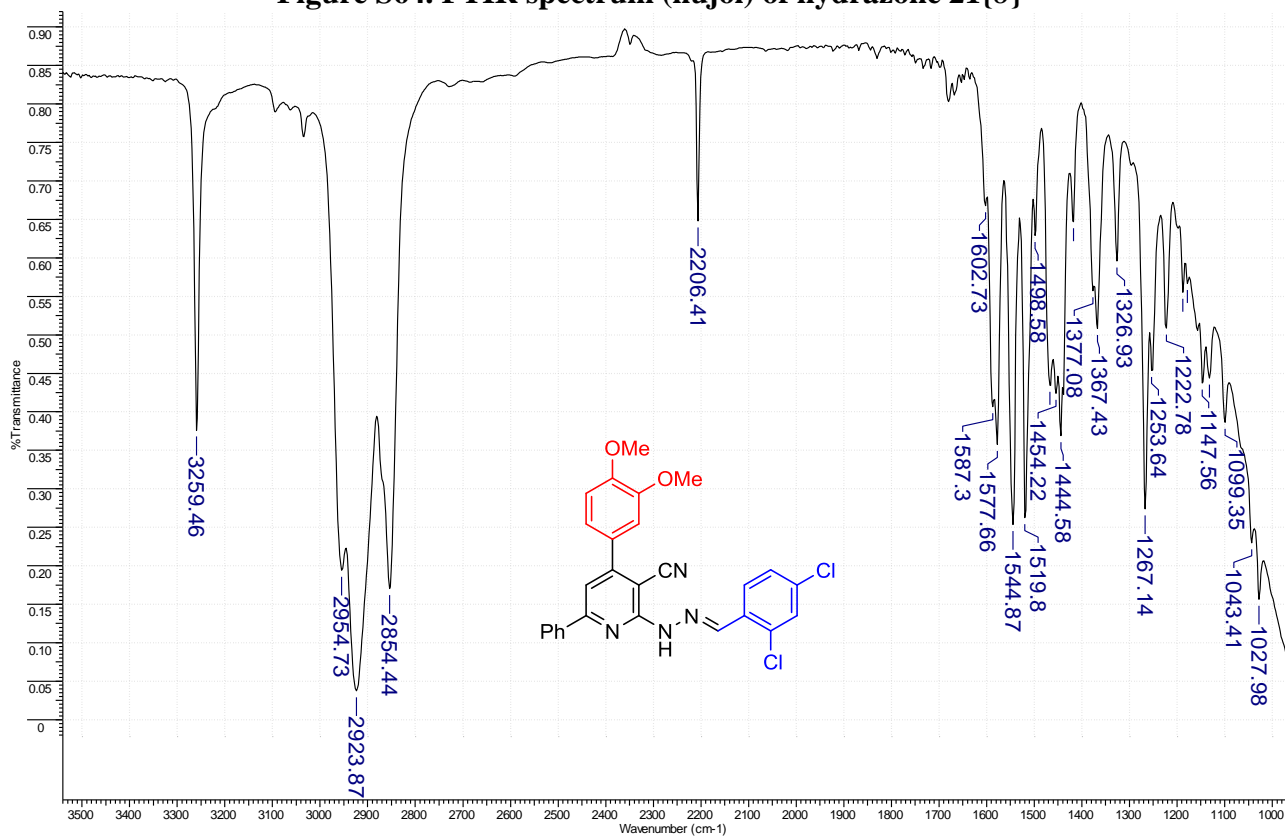

**Figure S65. HRMS spectrum of hydrazone 21{8}**

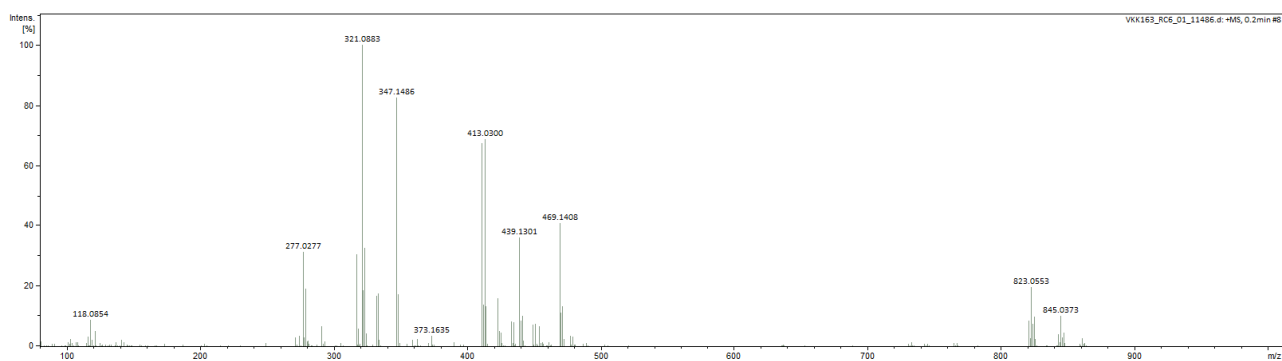

Figure S66.  $^1\text{H}$  NMR spectrum of hydrazone 21{8}, DMSO- $\text{d}_6$  (400 MHz)

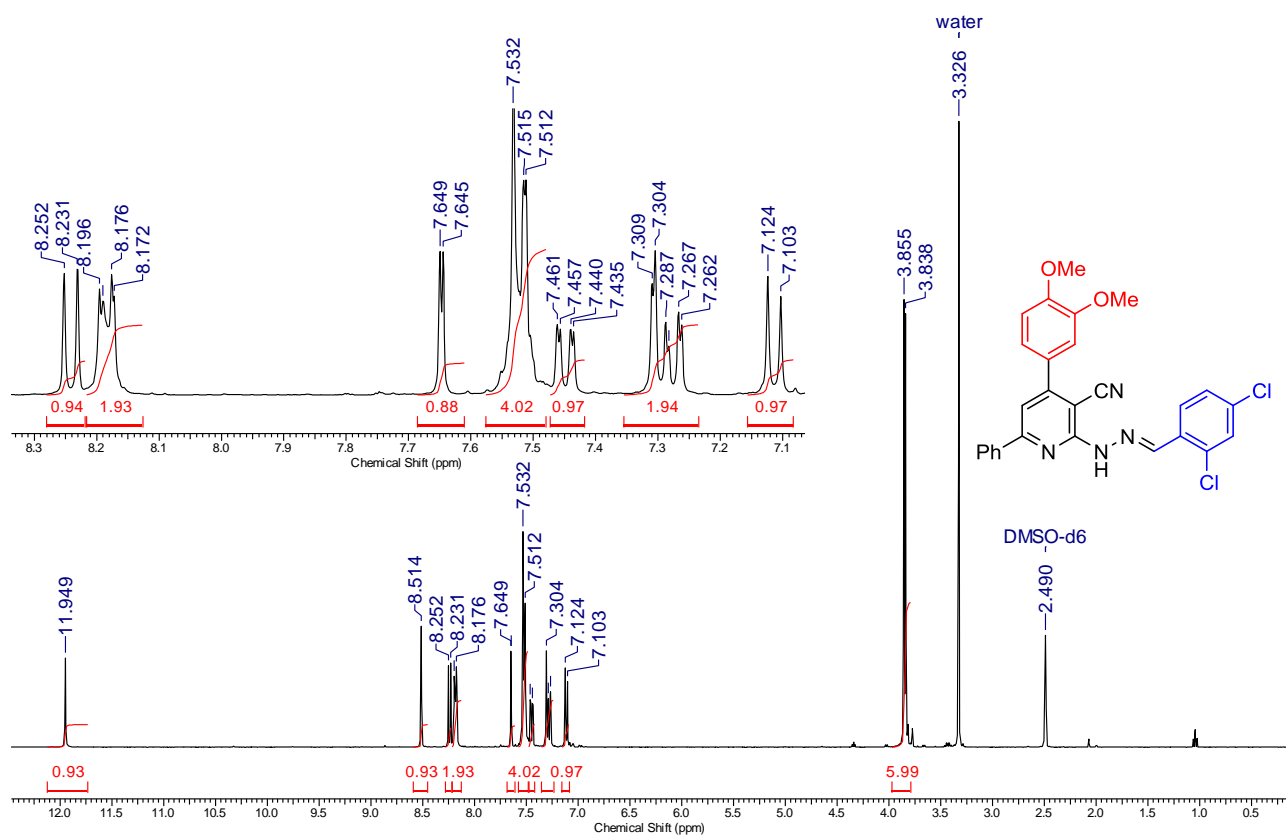

Figure S67.  $^{13}\text{C}$  NMR spectrum of hydrazone 21{8}, DMSO- $\text{d}_6$  (101 MHz)

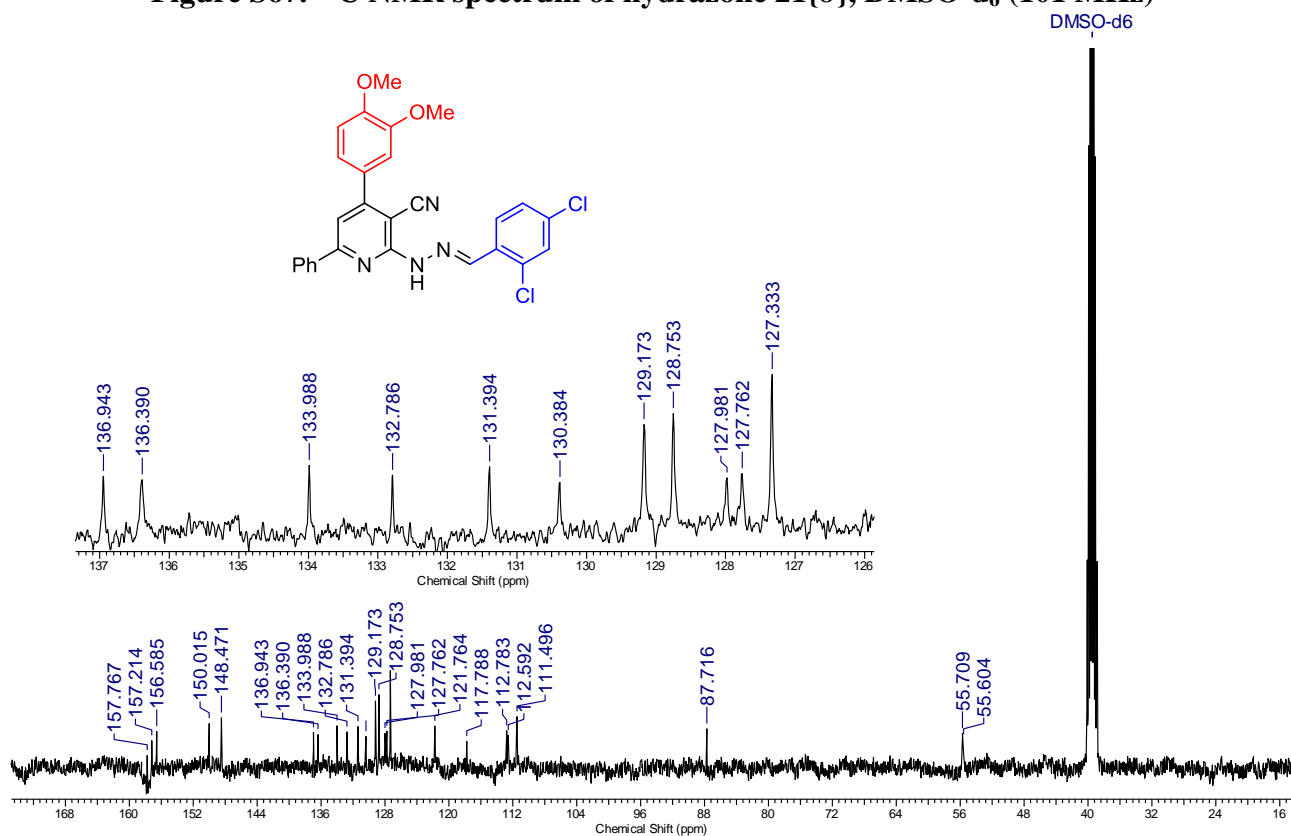

Figure S68. FTIR spectrum (nujol) of hydrazone 21{9}

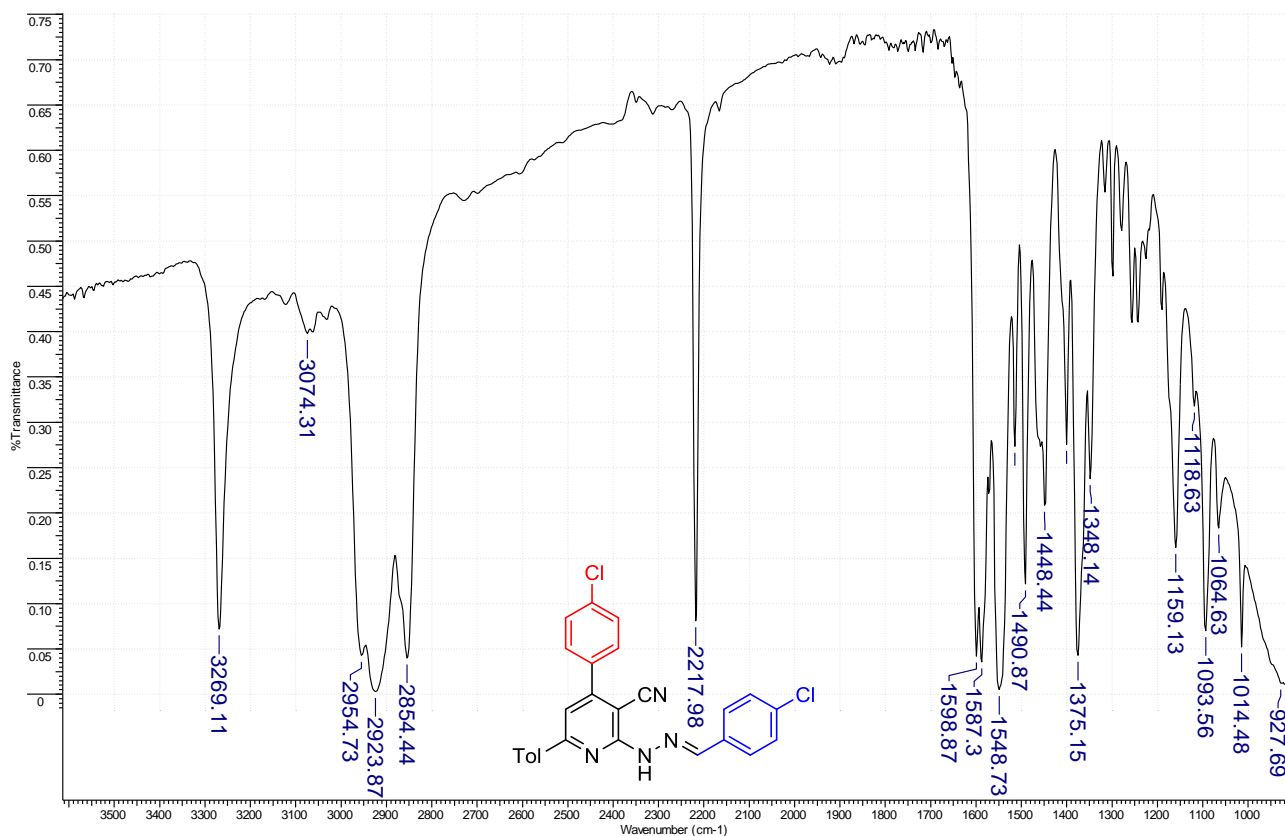

Figure S69. <sup>1</sup>H NMR spectrum of hydrazone 21{9}, DMSO-d<sub>6</sub> (400 MHz)

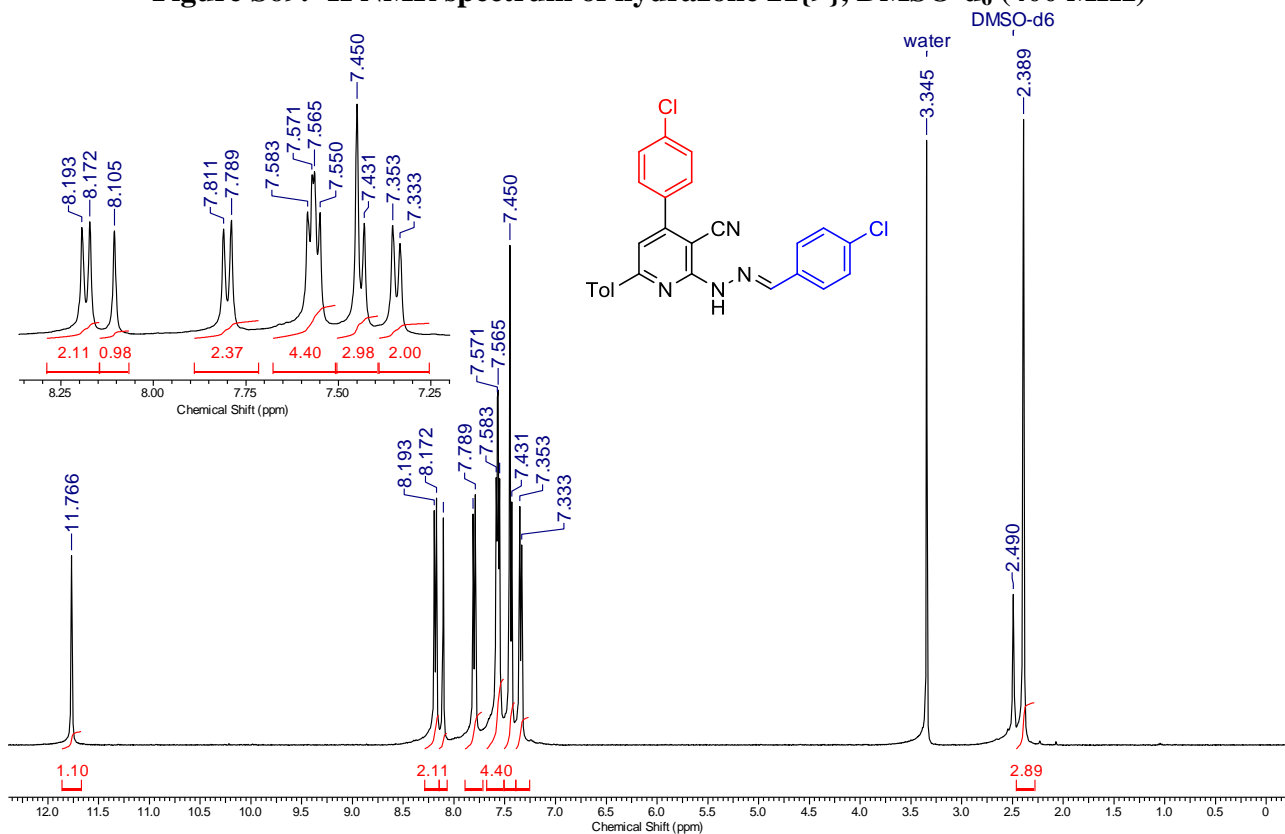

**Figure S70.**  $^{13}\text{C}$  NMR spectrum of hydrazone 21{9}, DMSO- $\text{d}_6$  (101 MHz)

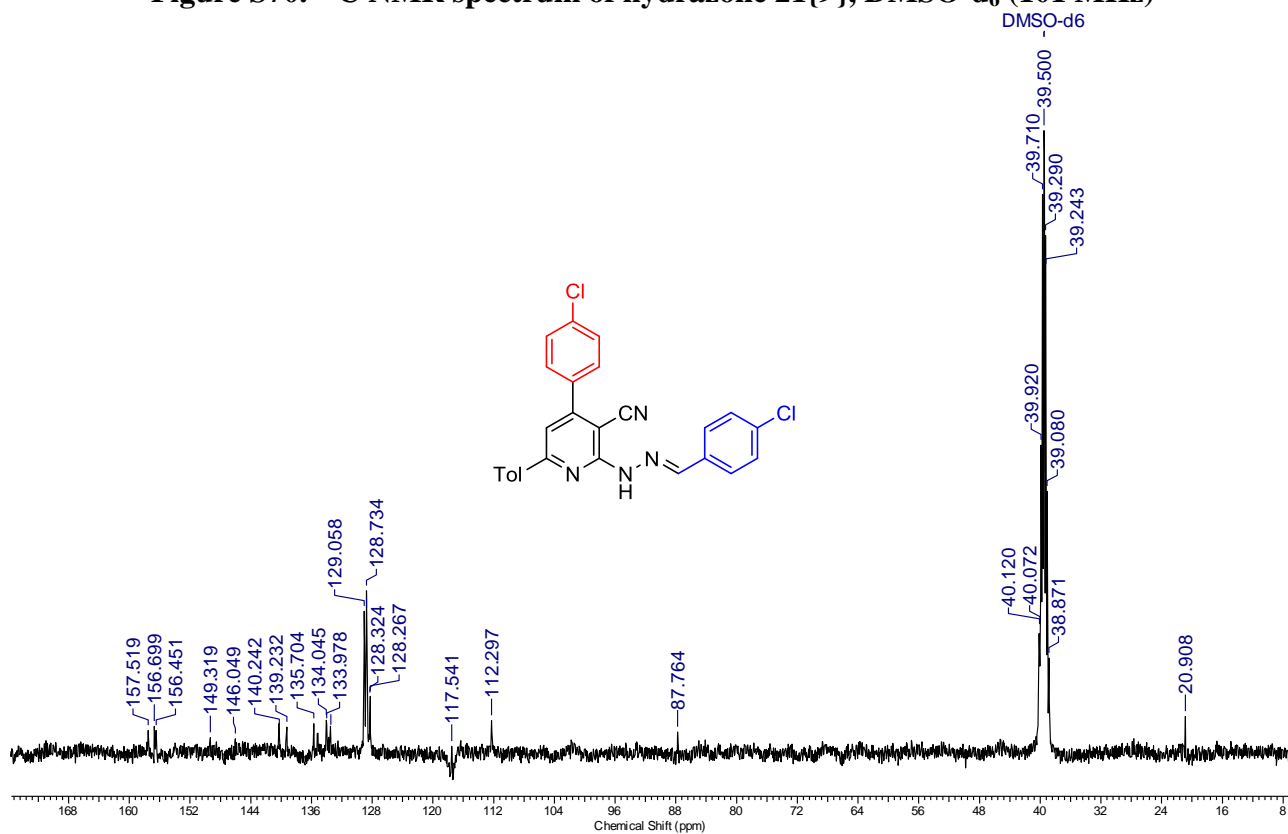

**Figure S71.** HRMS spectrum of hydrazone 21{9}

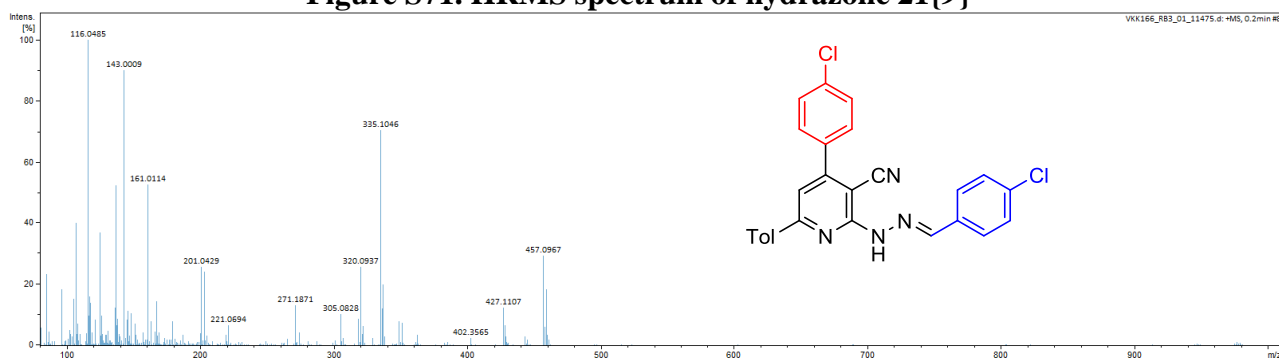

Figure S72. FTIR spectrum (nujol) of hydrazone 21{11}, solvate with EtOH 1 : 1

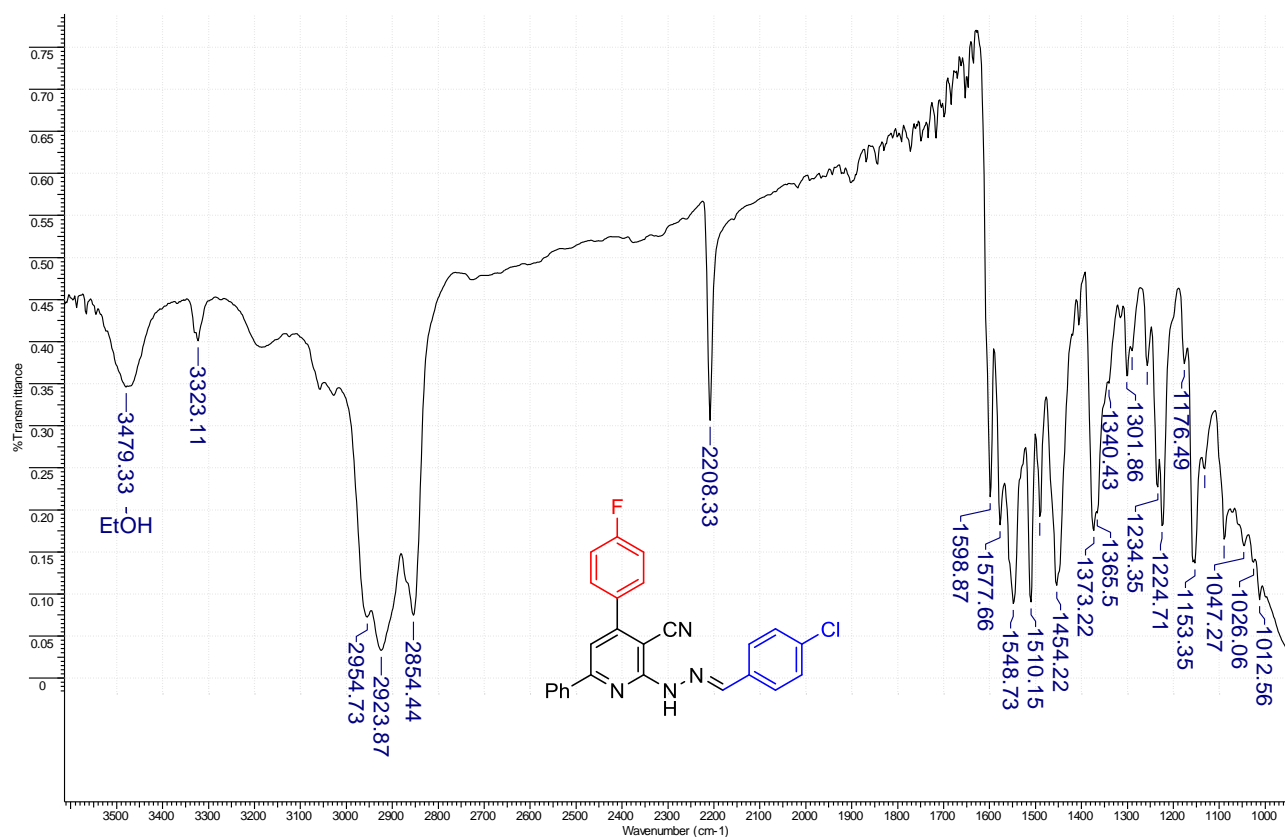

Figure S73. <sup>1</sup>H NMR spectrum of hydrazone 21{11}, solvate with EtOH 1 : 1, DMSO-d<sub>6</sub> (400 MHz)

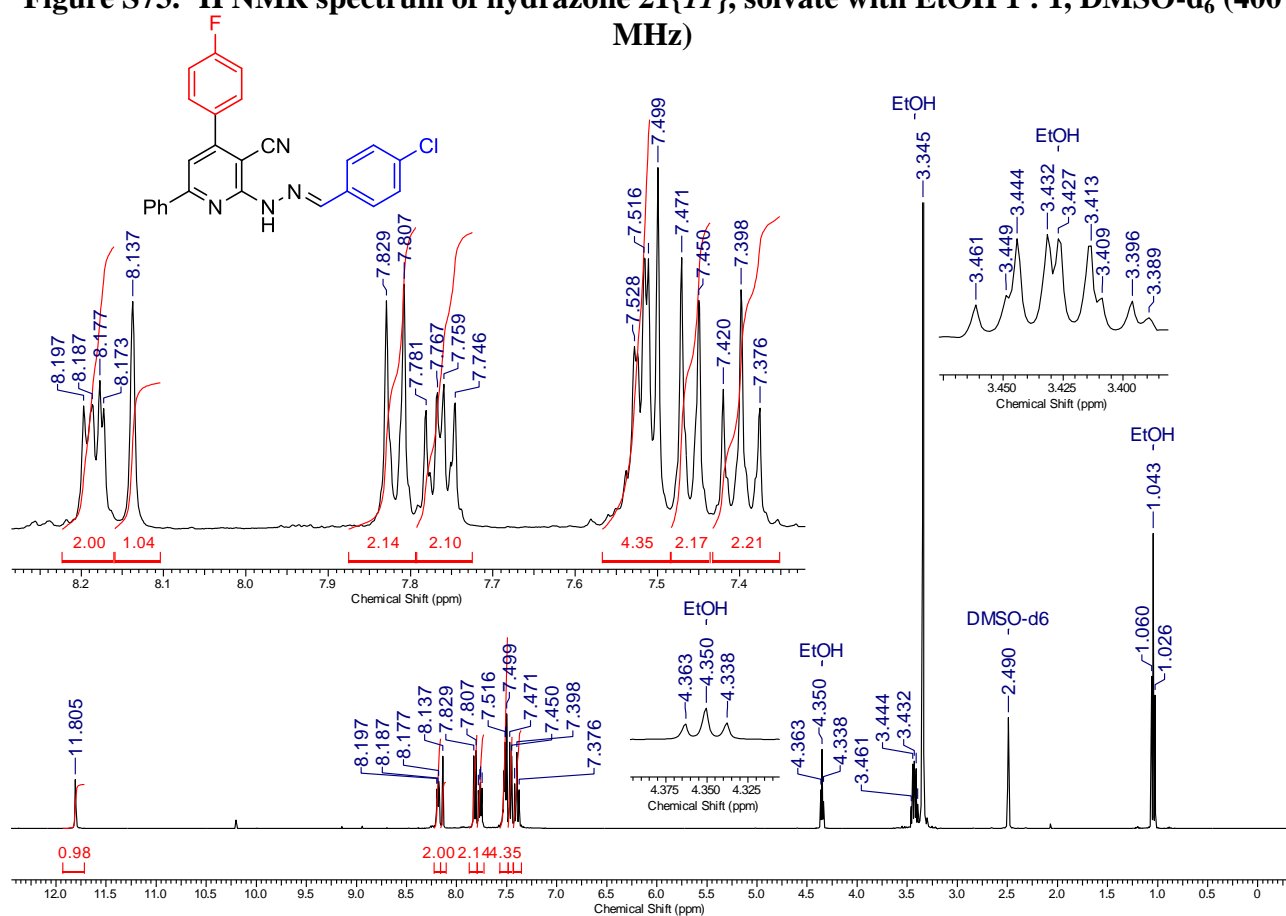

**Figure S74.**  $^{13}\text{C}$  NMR spectrum of hydrazone **21{II}**, solvate with EtOH 1 : 1, DMSO- $\text{d}_6$  (101 MHz)

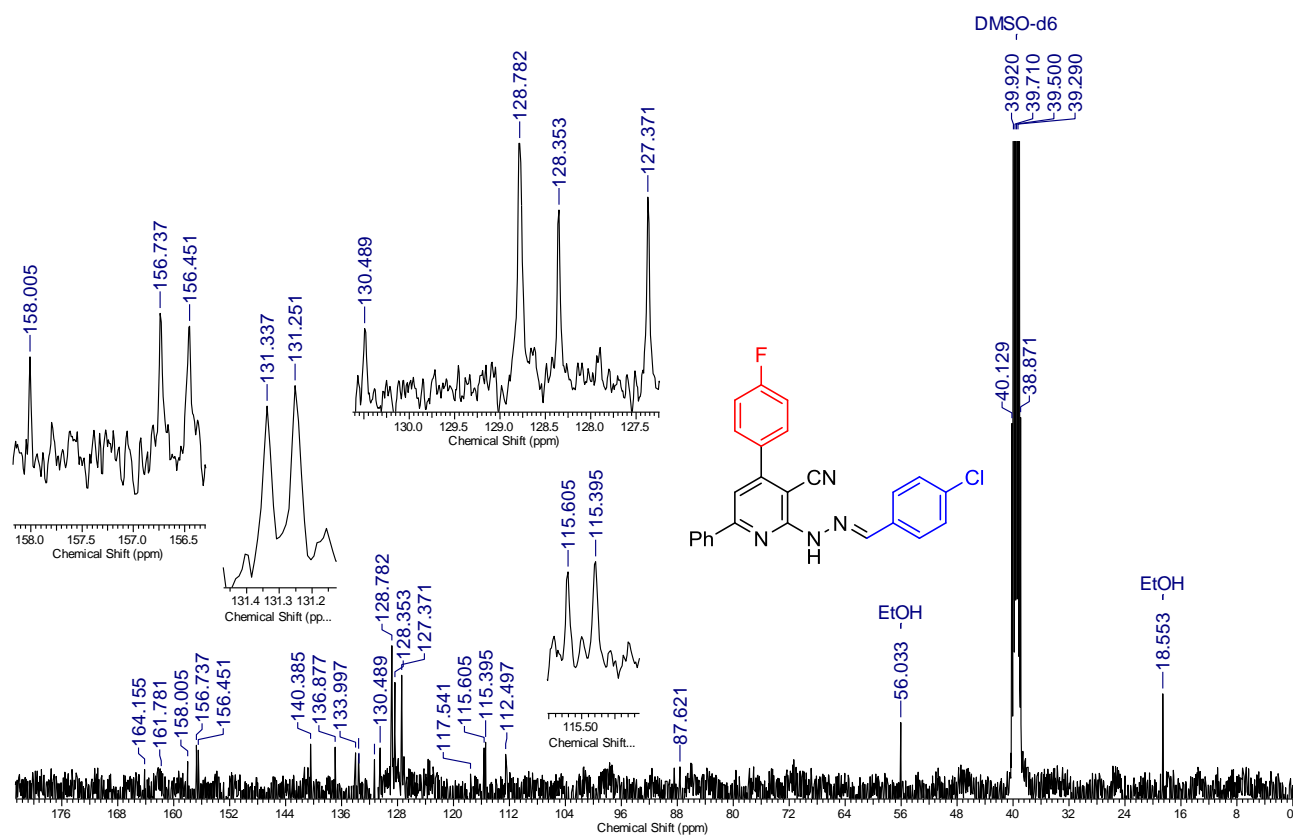

**Figure S75.** HRMS spectrum of hydrazone **21{II}**

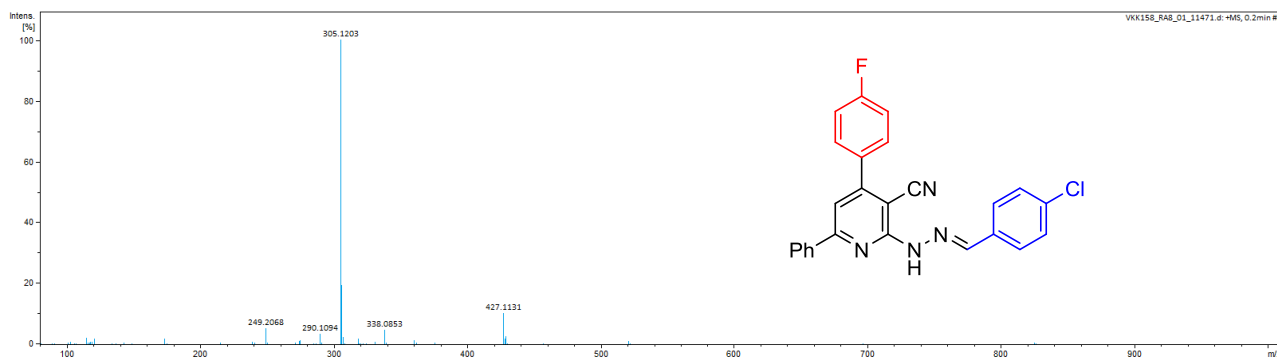

Figure S76. FTIR spectrum (nujol) of hydrazone 21{12}, solvate with EtOH 1 : 1

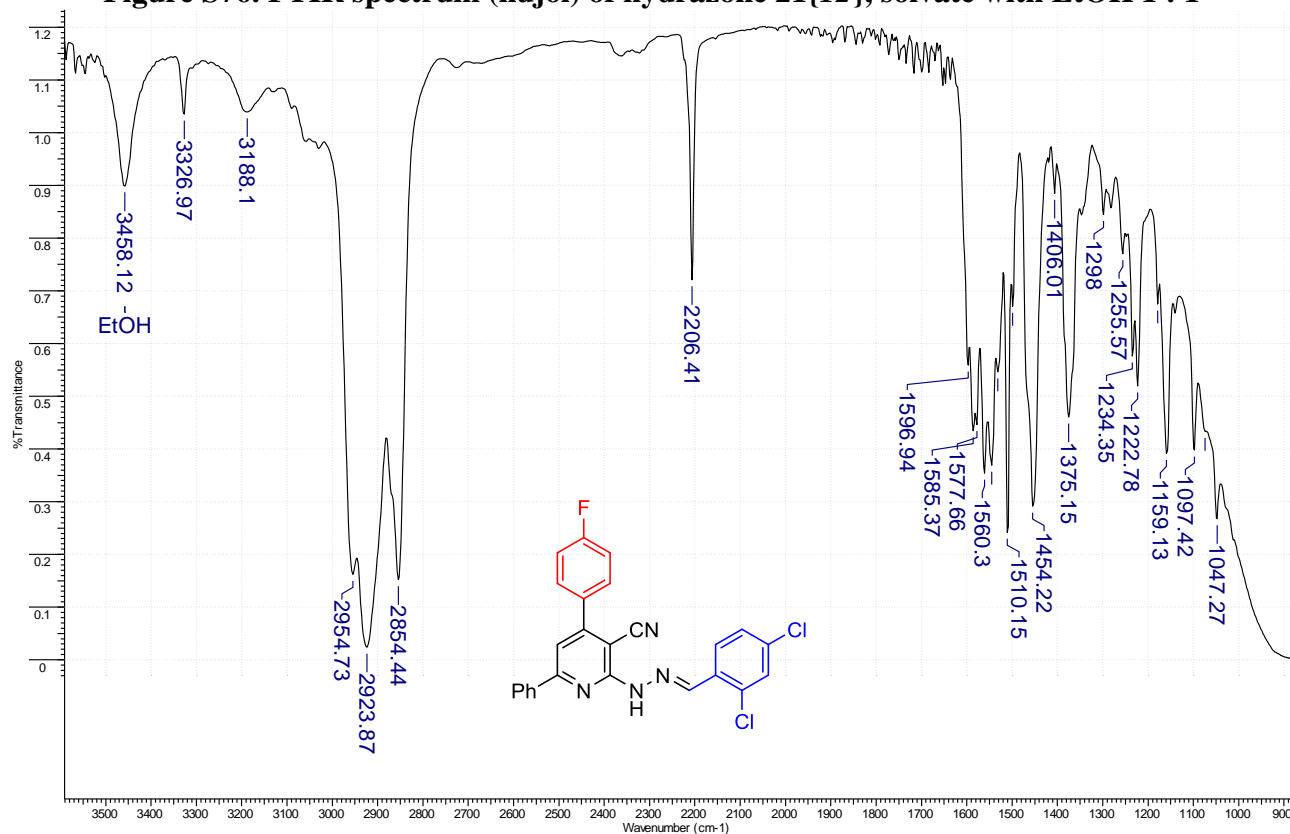

Figure S77. <sup>1</sup>H NMR spectrum of hydrazone 21{12}, solvate with EtOH 1 : 1, DMSO-d<sub>6</sub> (400 MHz)

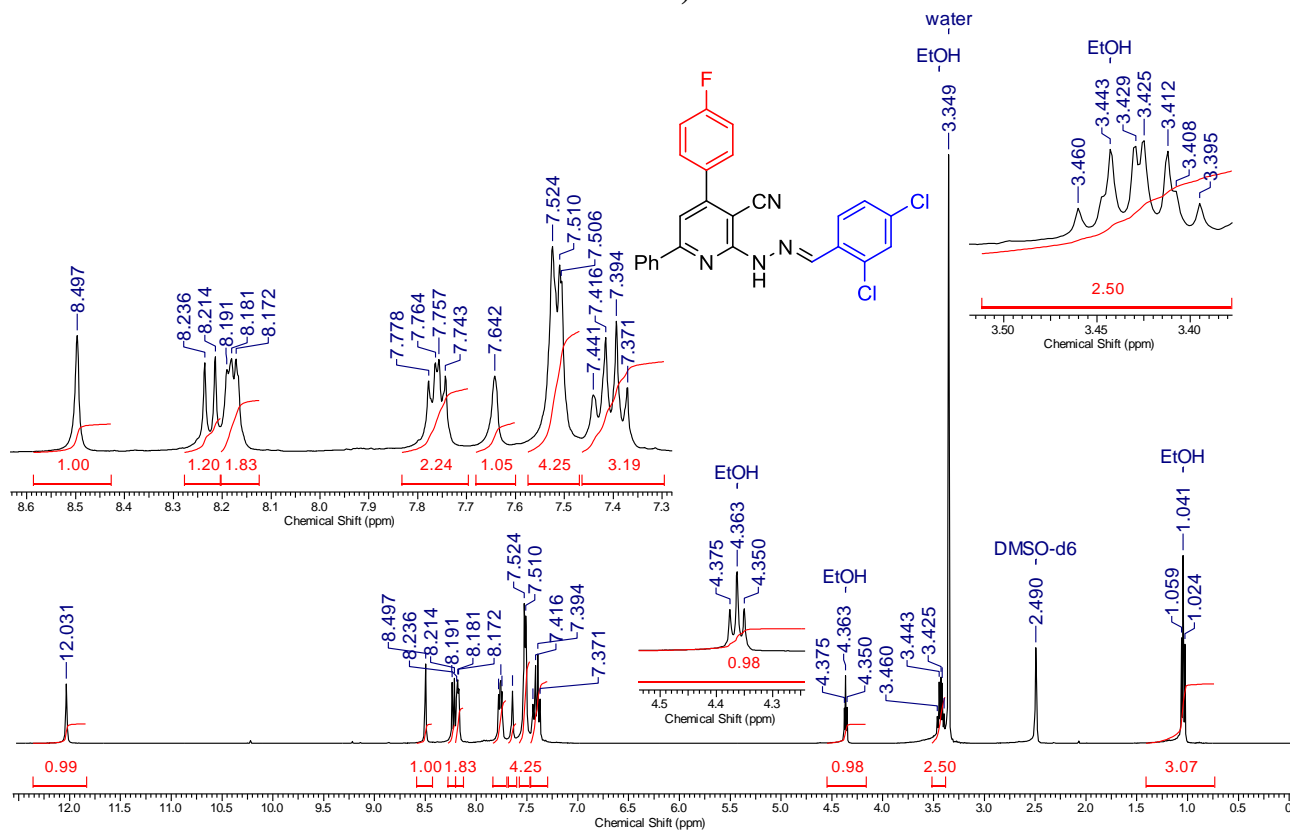



**Figure S78.**  $^{13}\text{C}$  NMR spectrum of hydrazone 21{12}, solvate with EtOH 1 : 1, DMSO- $\text{d}_6$  (101 MHz)

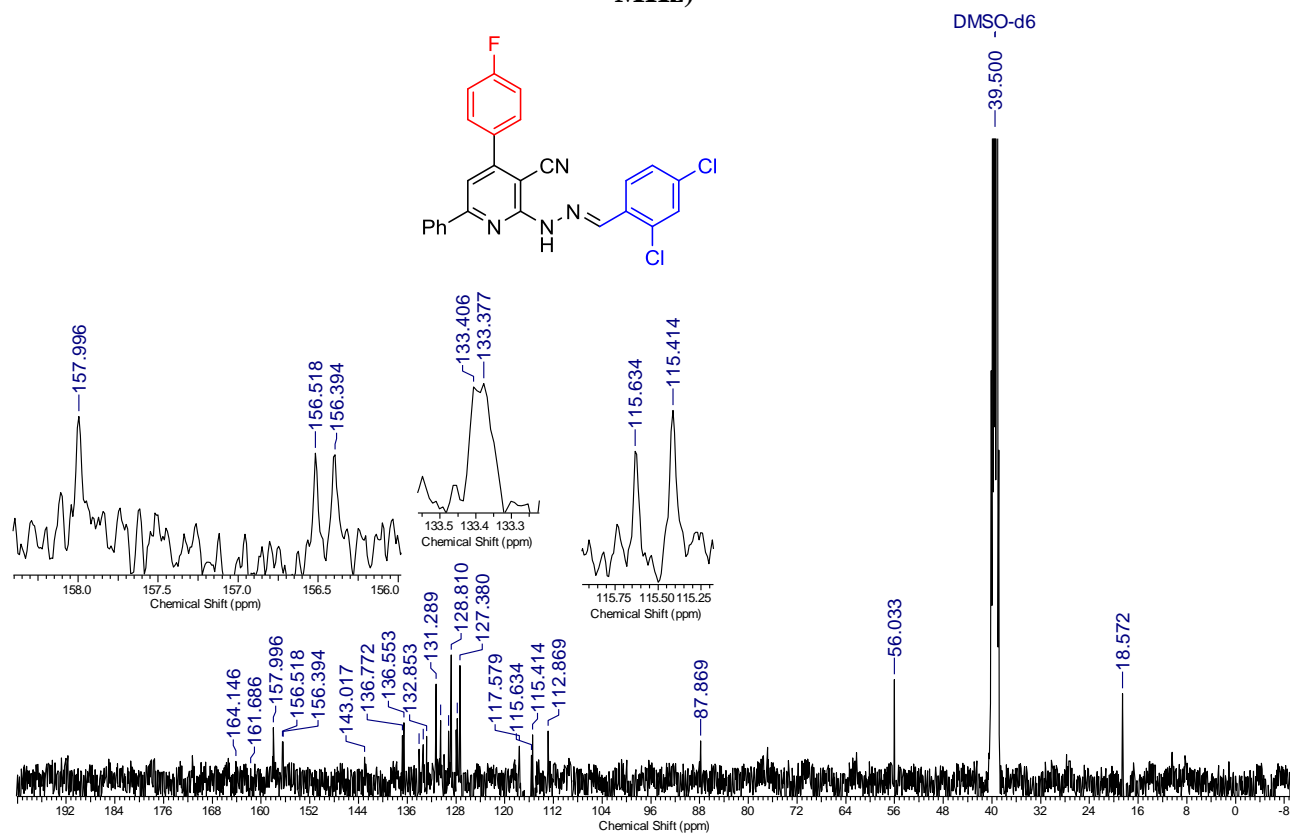

**Figure S79.** HRMS spectrum of hydrazone 21{12}

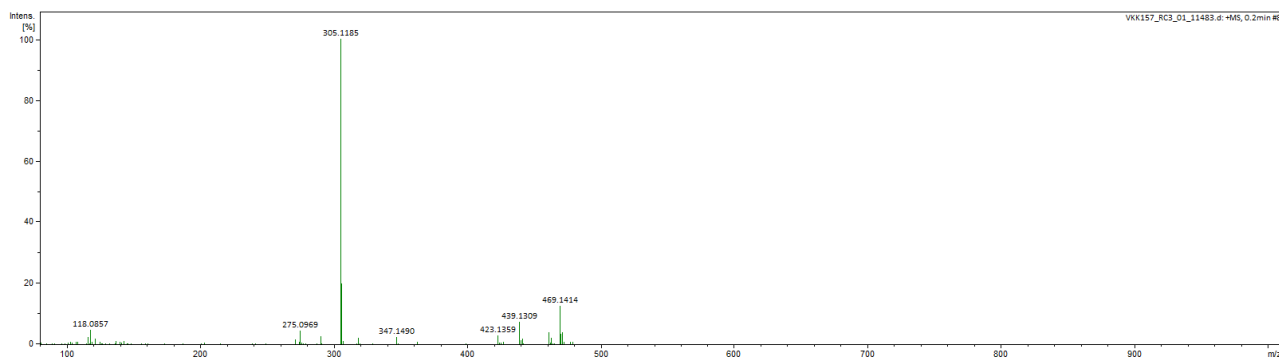

Figure S80. FTIR spectrum (nujol) of hydrazone 21{13}

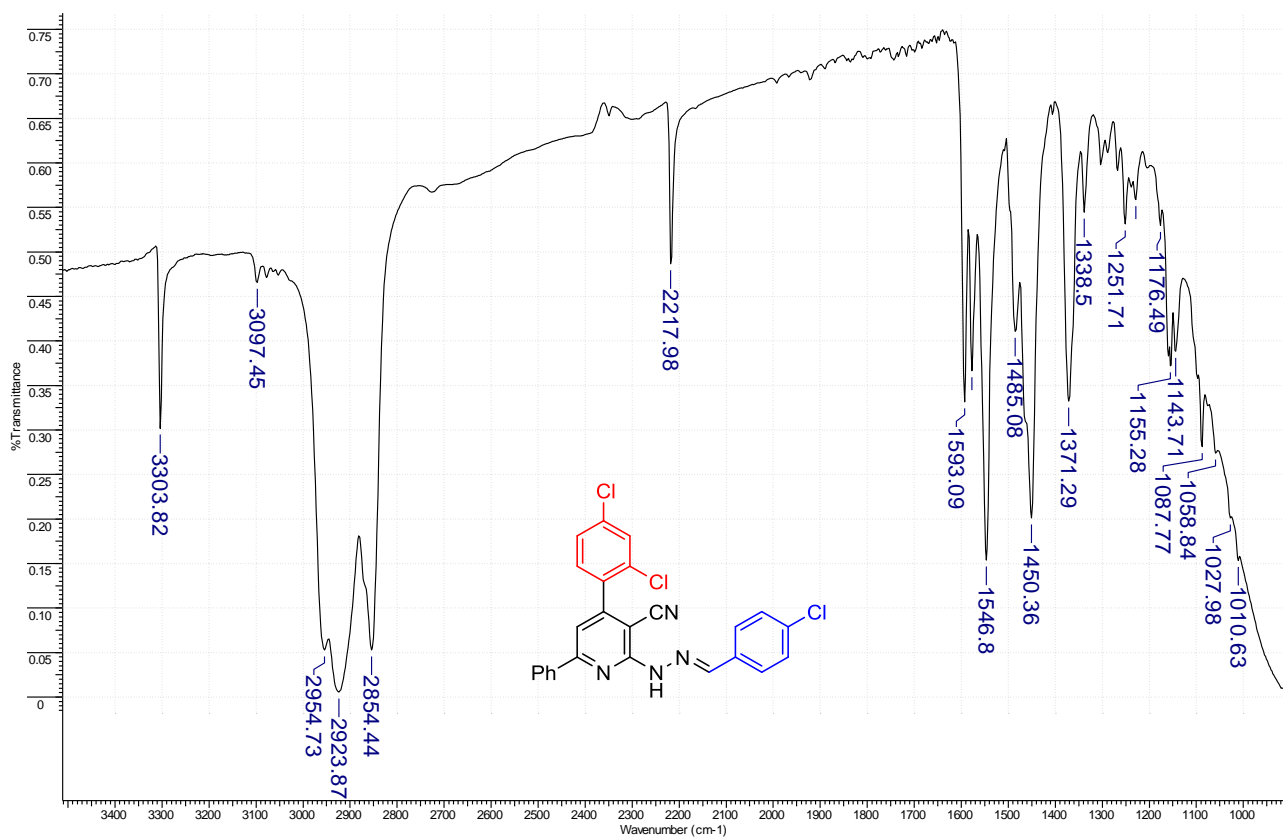

Figure S81. <sup>1</sup>H NMR spectrum of hydrazone 21{13}, DMSO-d<sub>6</sub> (400 MHz)

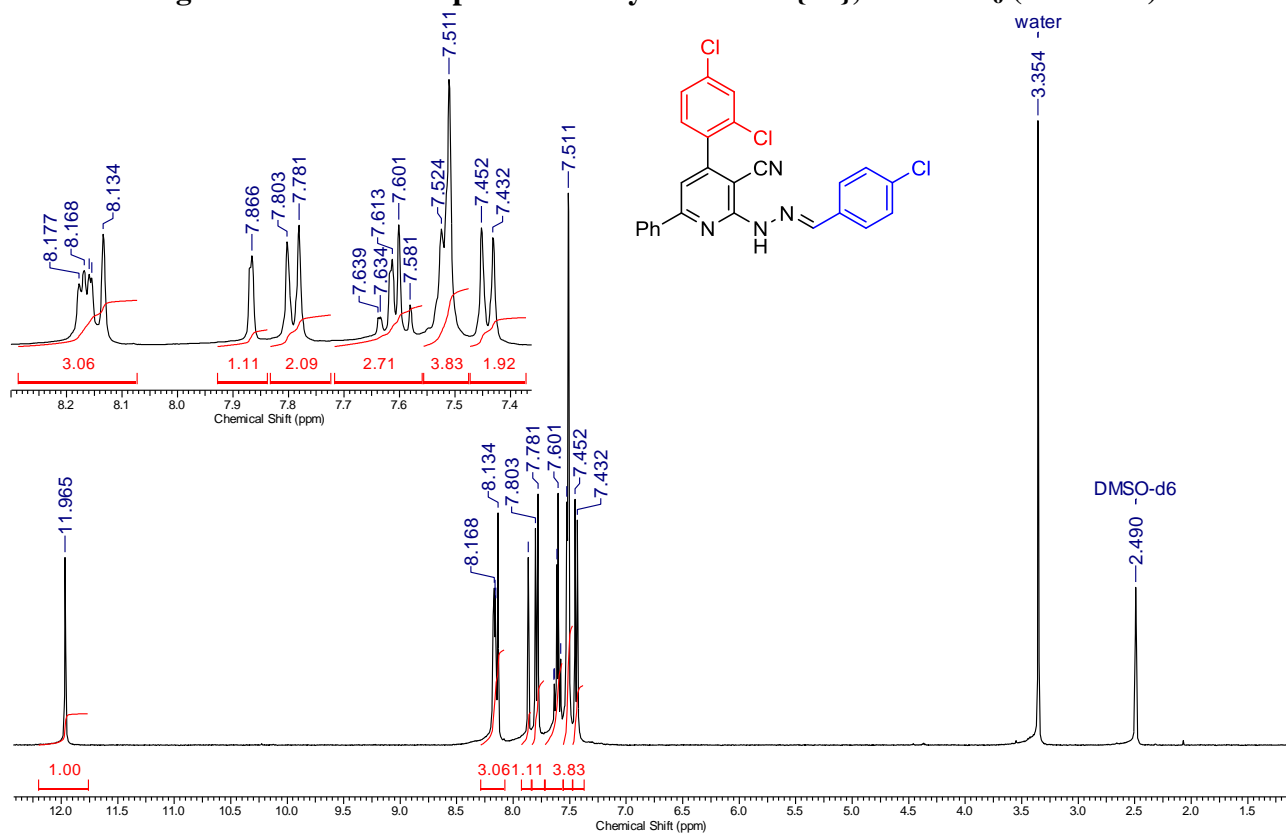

**Figure S82.  $^{13}\text{C}$  NMR spectrum of hydrazone 21{13}, DMSO- $\text{d}_6$  (101 MHz)**

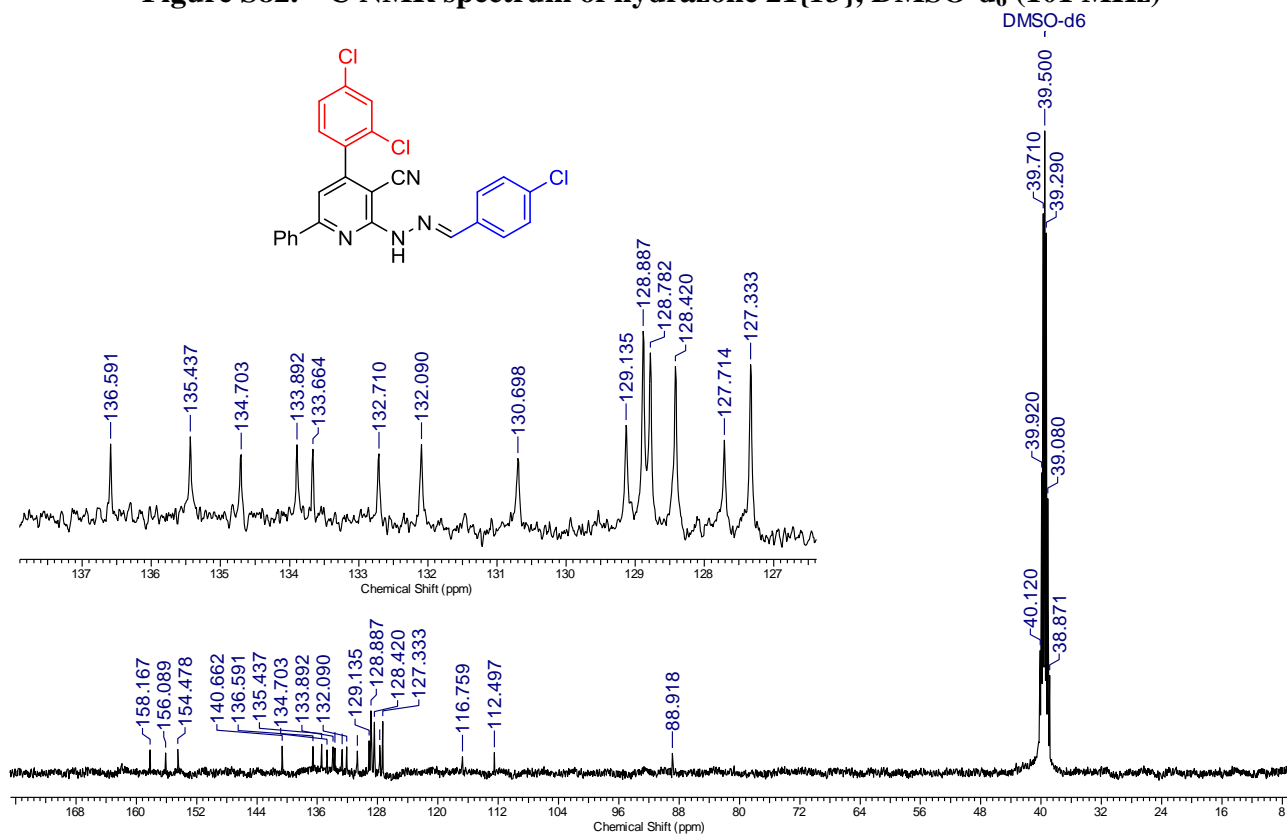

**Figure S83. HRMS spectrum of hydrazone 21{13}**

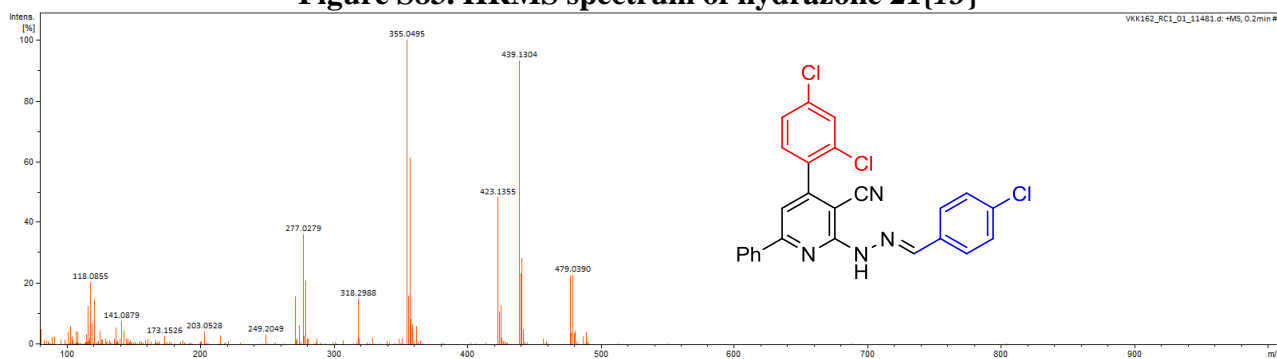

**Figure S84. HRMS spectrum of hydrazone 21{14}**

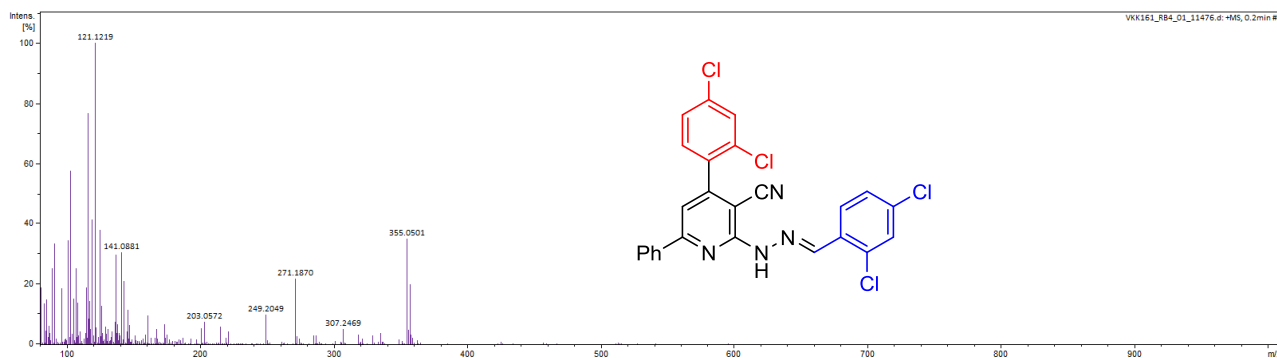

Figure S85. FTIR spectrum (nujol) of hydrazone 21{14}, solvate with dioxane 1 : 1,

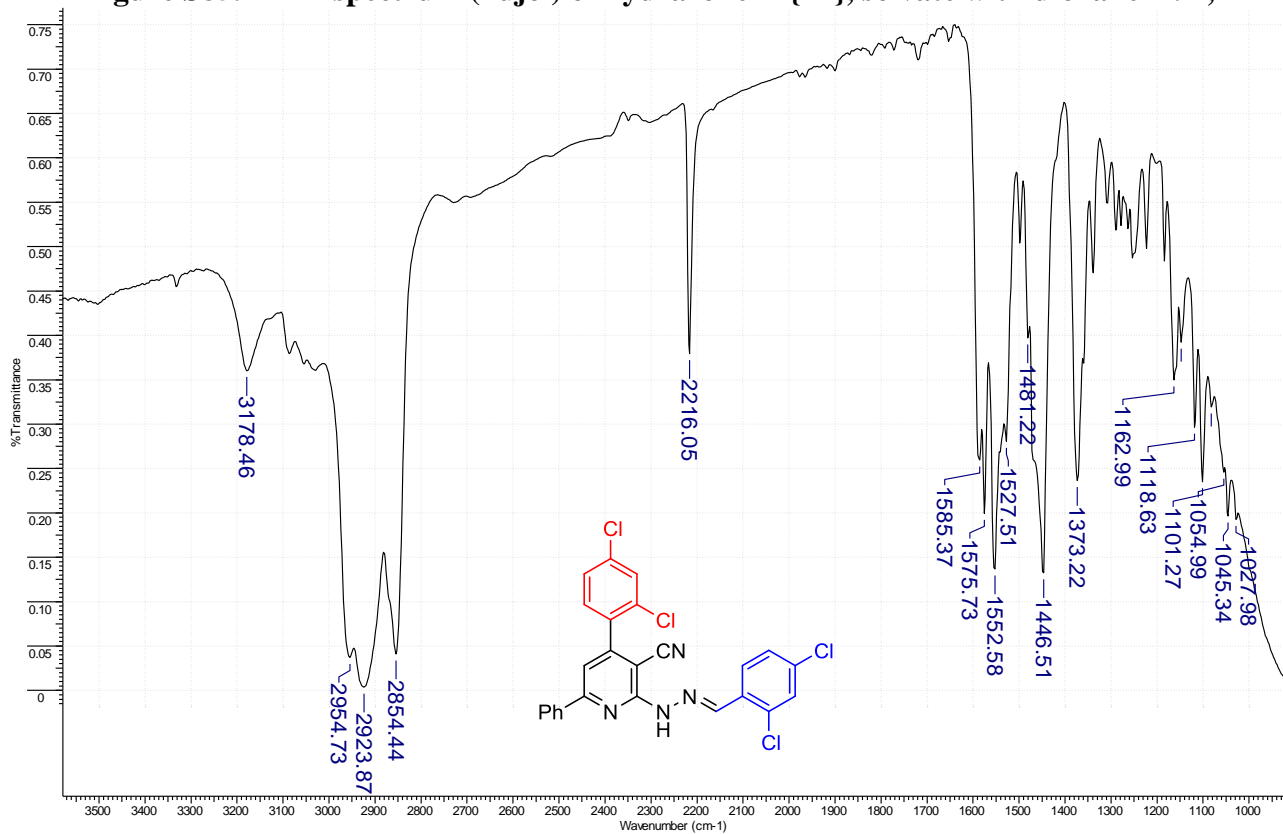

Figure S86.  $^1\text{H}$  NMR spectrum of hydrazone 21{14}, solvate with dioxane 1 : 1, DMSO- $d_6$  (400 MHz)

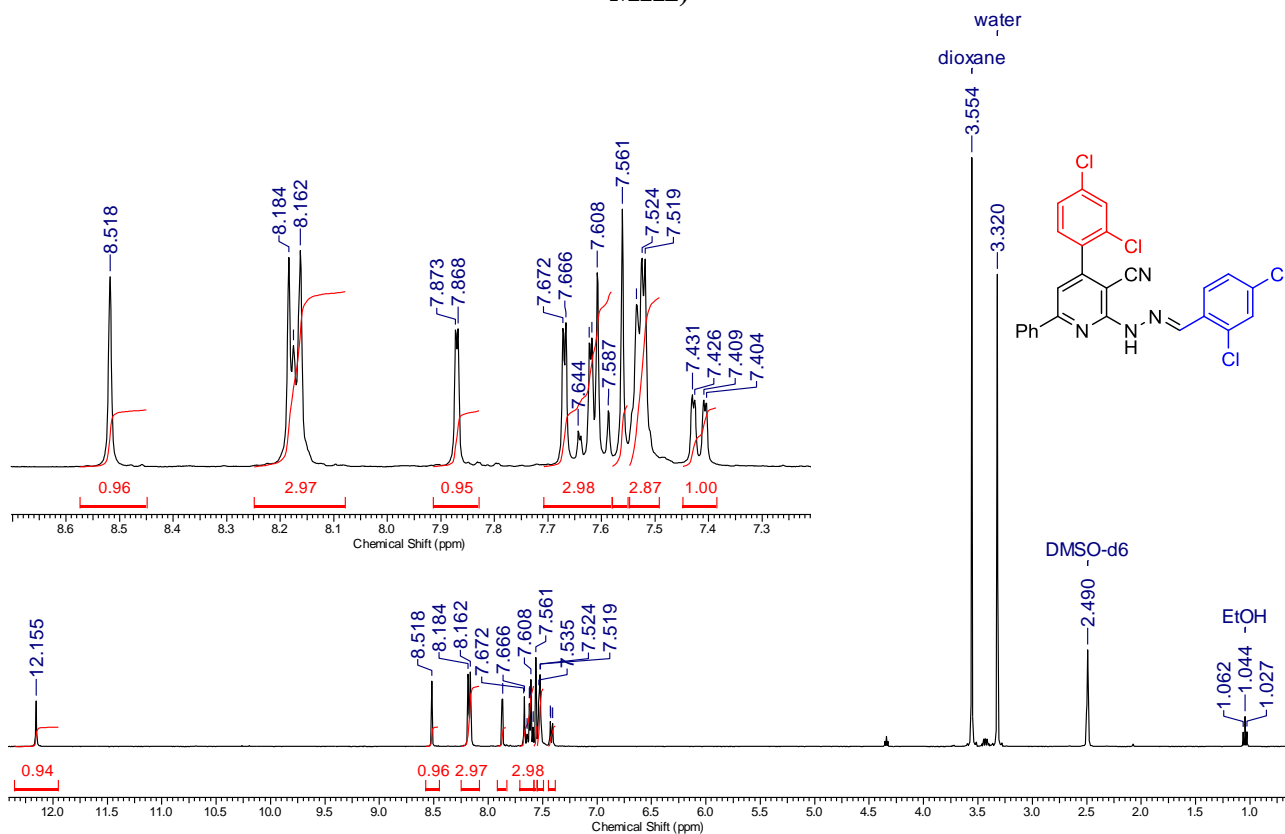

**Figure S87.  $^{13}\text{C}$  NMR spectrum of hydrazone 21{14}, solvate with dioxane 1 : 1, DMSO- $\text{d}_6$  (101 MHz)**

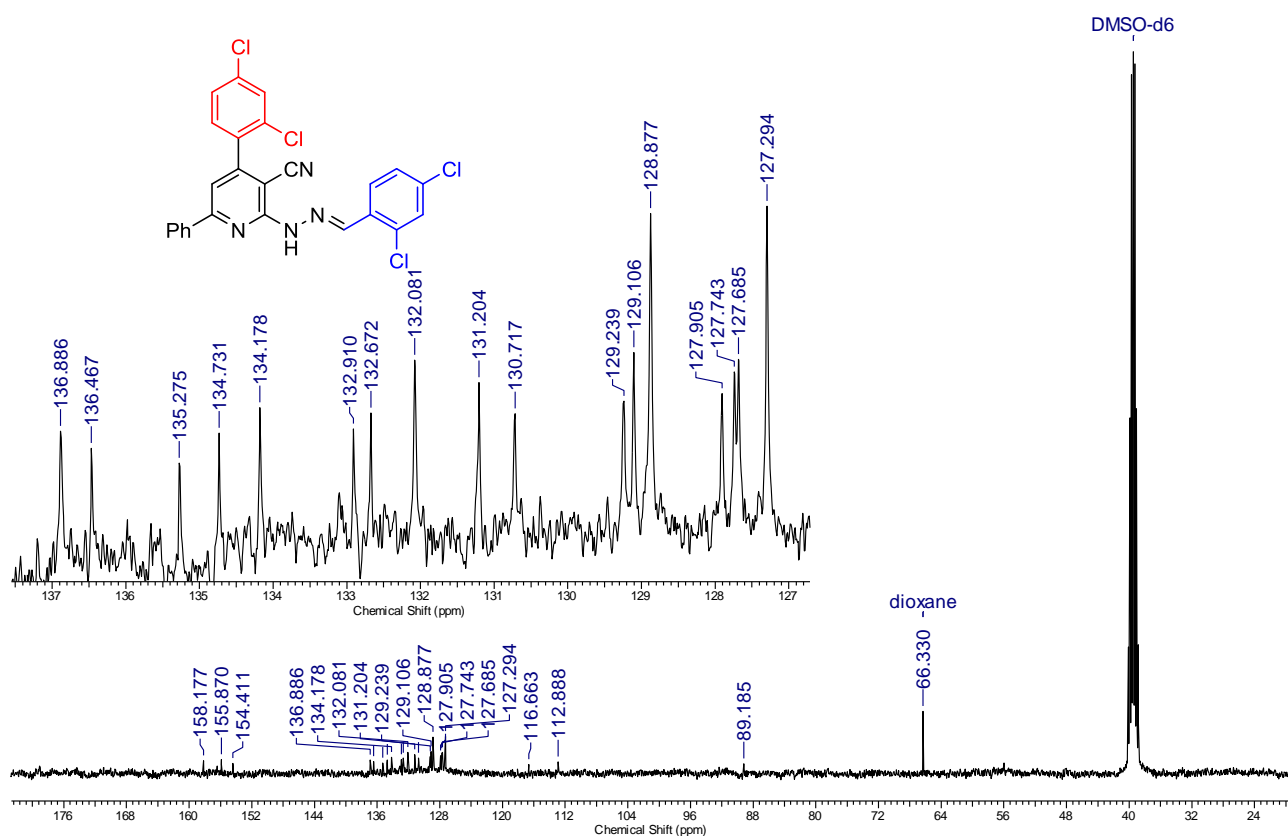

**Figure S88. FTIR spectrum (nujol) of hydrazone 21{15}**

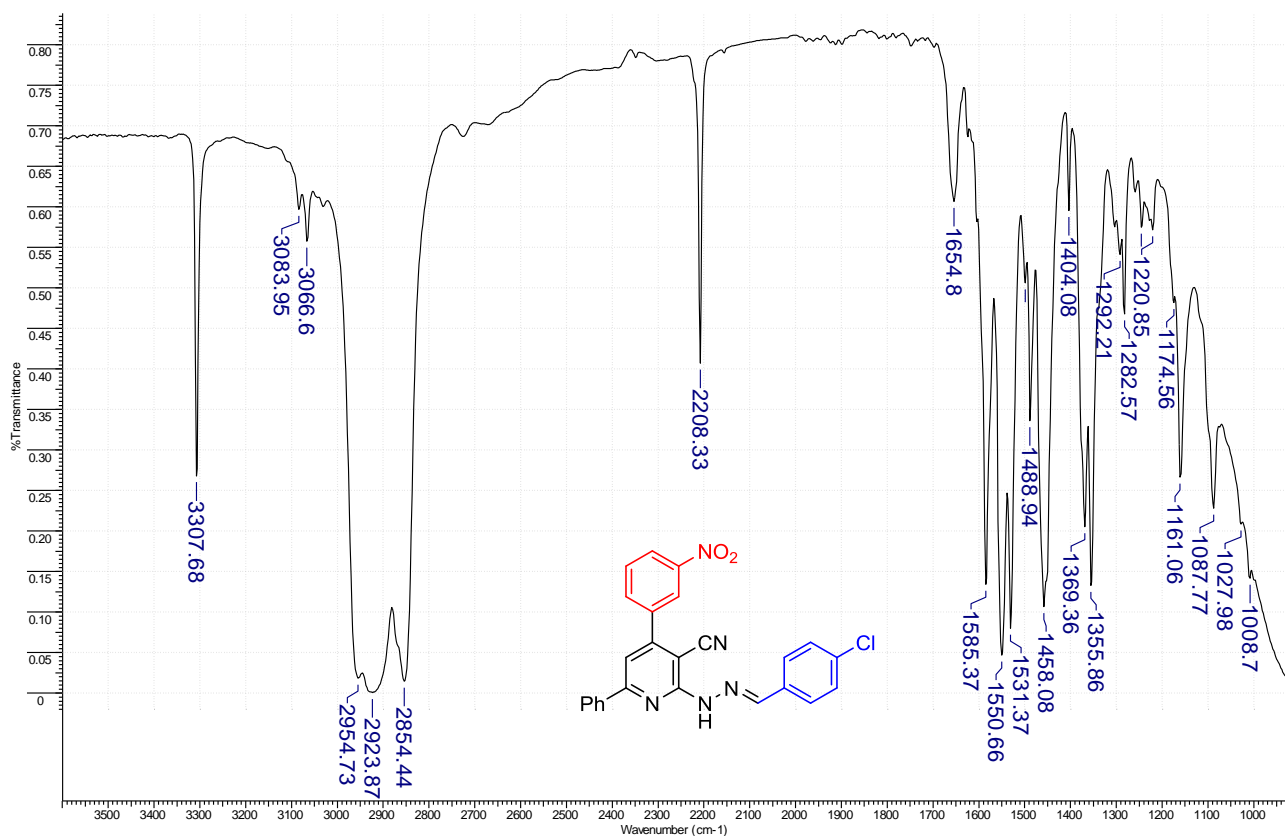

Chemical structure of compound 10: O=C1NC(=C(C=C1C2=CC=CC=C2)C3=CC(=CC=C3)[N+](=O)[O-])C(=NN1C=C4C=CC(=C4)Cl)C5=CC=CC=C5

<sup>13</sup>C NMR spectrum (Acetone-d<sub>6</sub>) showing chemical shifts (ppm):

- 149.125
- 141.612
- 137.998
- 136.196
- 135.233
- 135.071
- 131.353
- 130.876
- 130.800
- 129.579
- 129.455
- 128.254
- 124.898
- 124.660
- 117.728
- 113.504
- 89.210
- 29.800 (Acetone-d<sub>6</sub>)

**Figure S91. HRMS spectrum of hydrazone 21{15}**

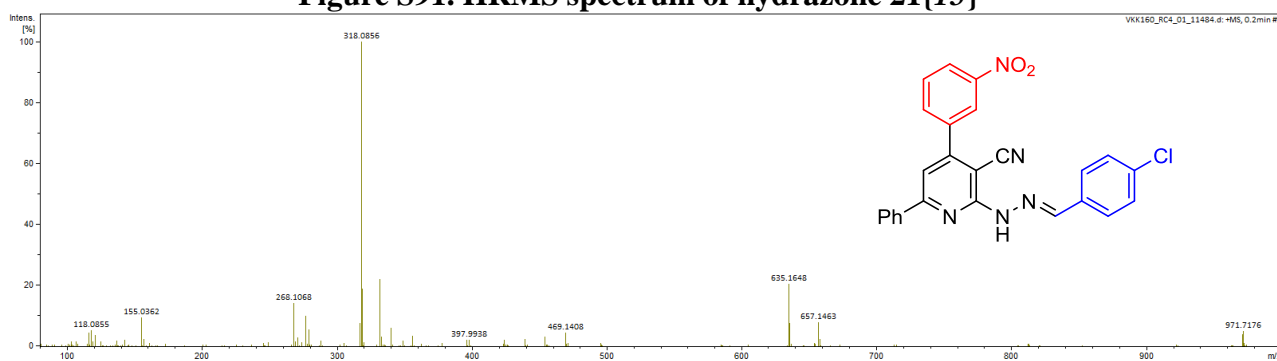

**Figure S92. FTIR spectrum (nujol) of hydrazone 21{16}**

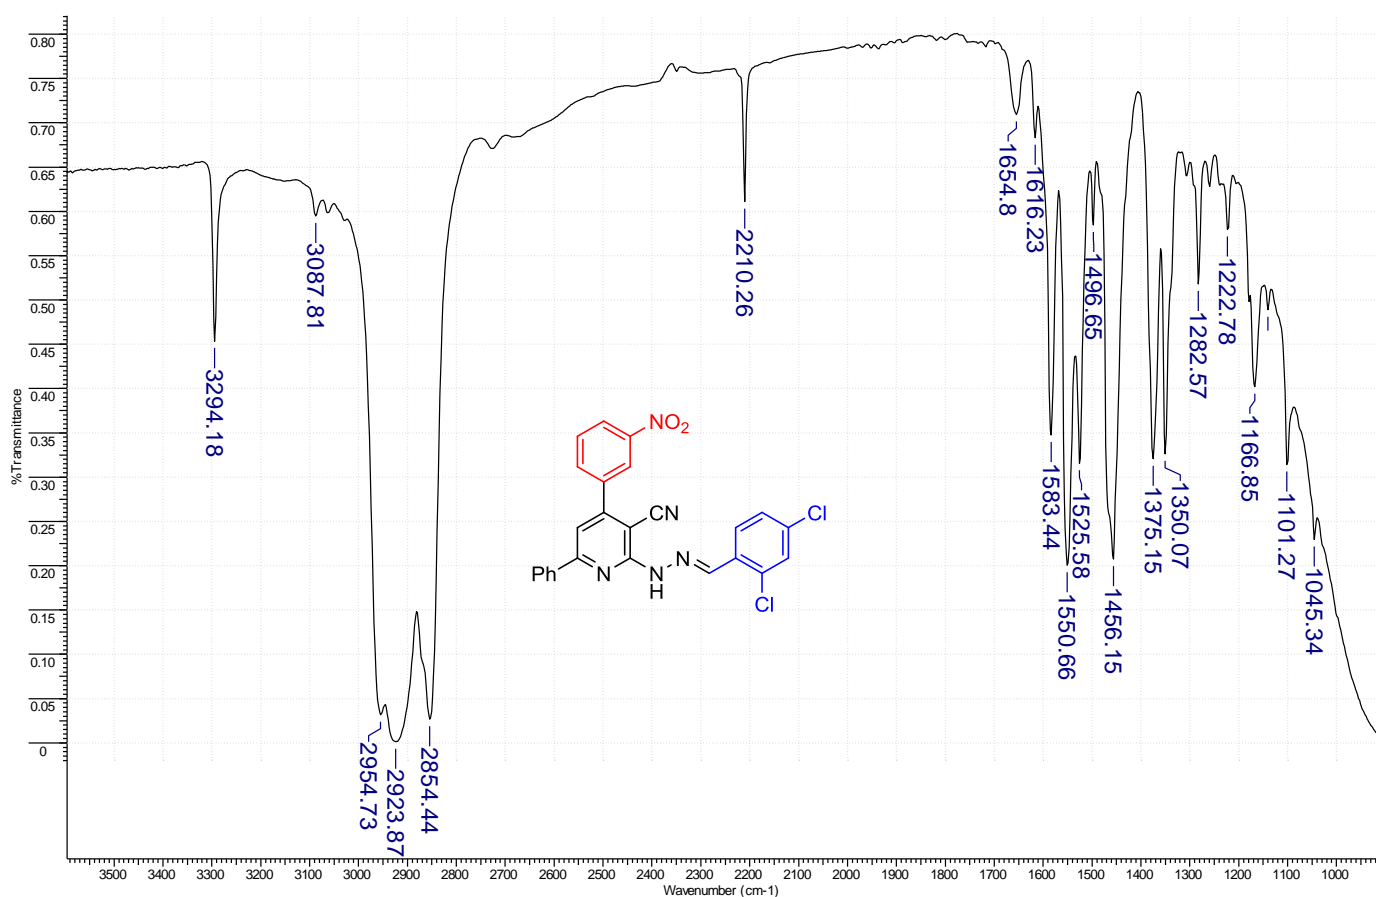

**Figure S93. HRMS spectrum of hydrazone 21{16}**

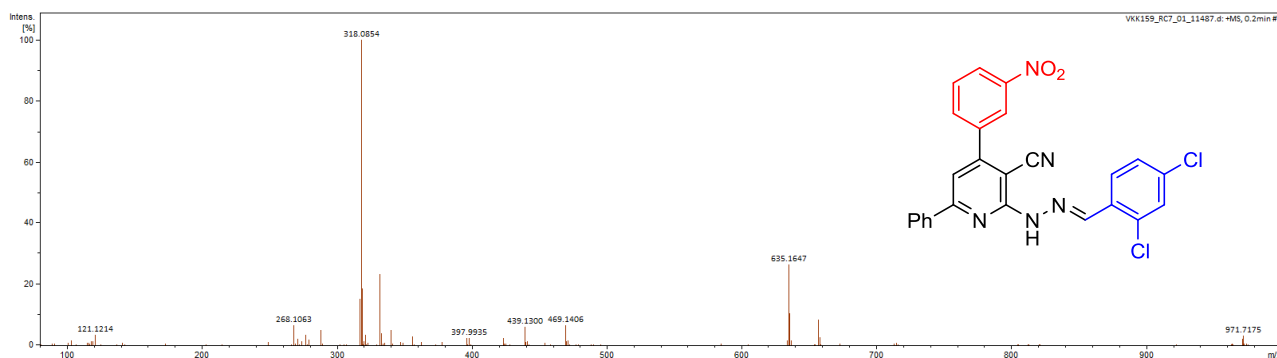

**Figure S94. FTIR spectrum (nujol) of hydrazone 21{17}**

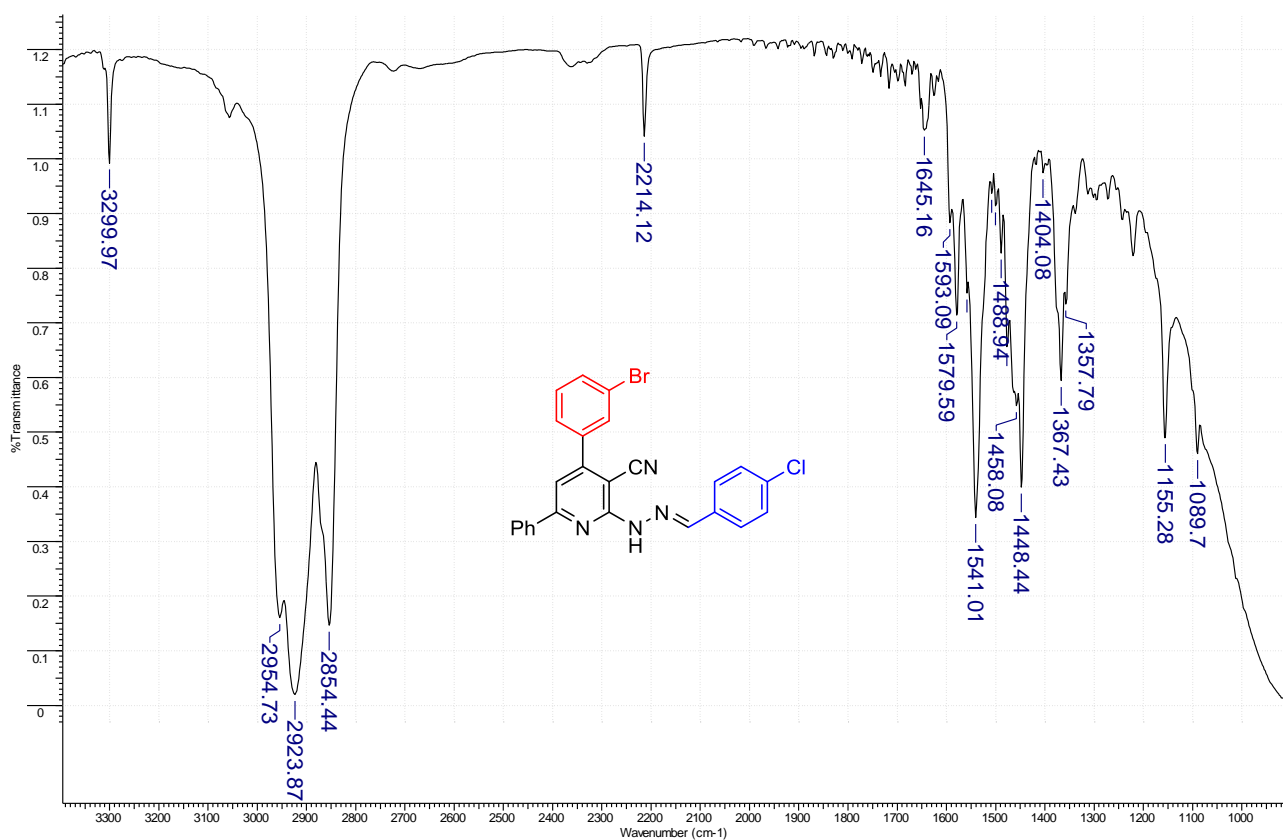



Figure S95. FTIR spectrum (nujol) of hydrazone 21{19}

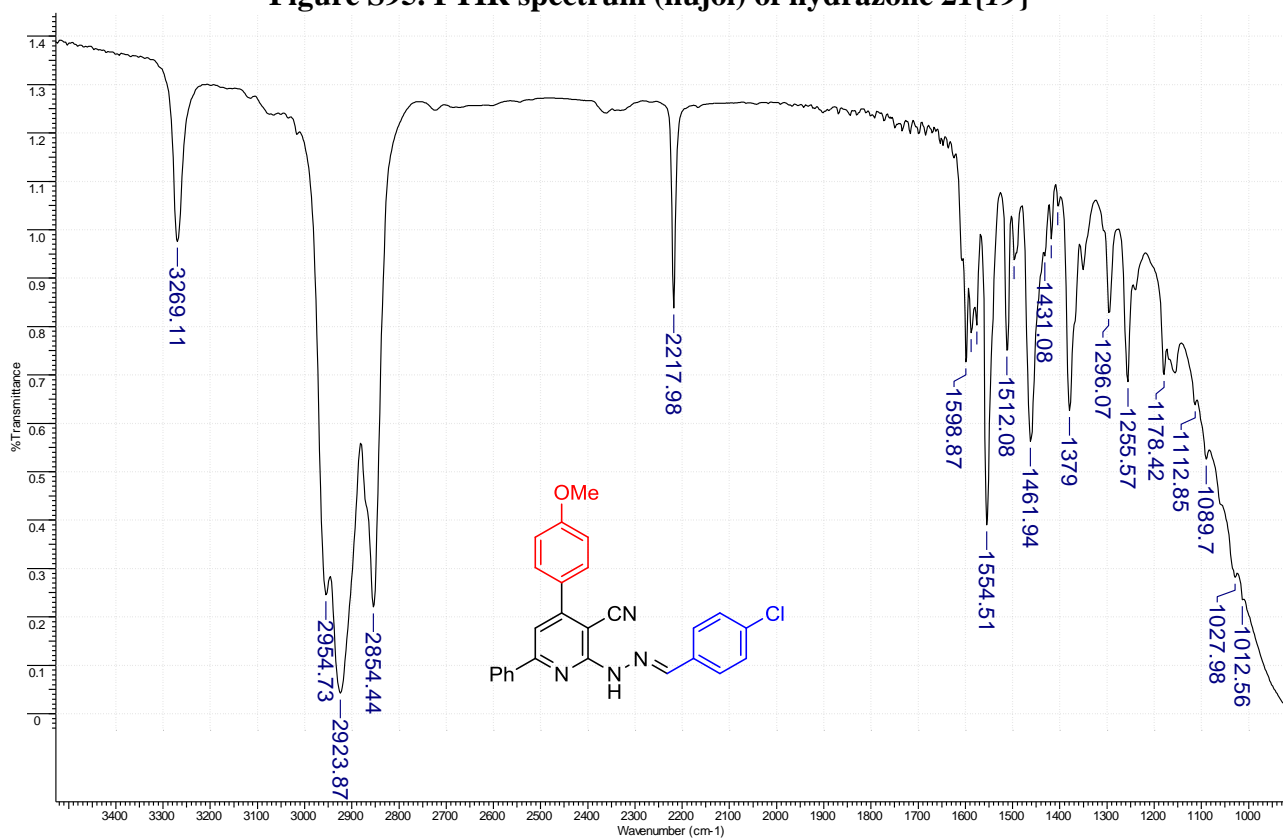

Figure S96. <sup>1</sup>H NMR spectrum of hydrazone 21{19}, DMSO-d<sub>6</sub> (400 MHz)

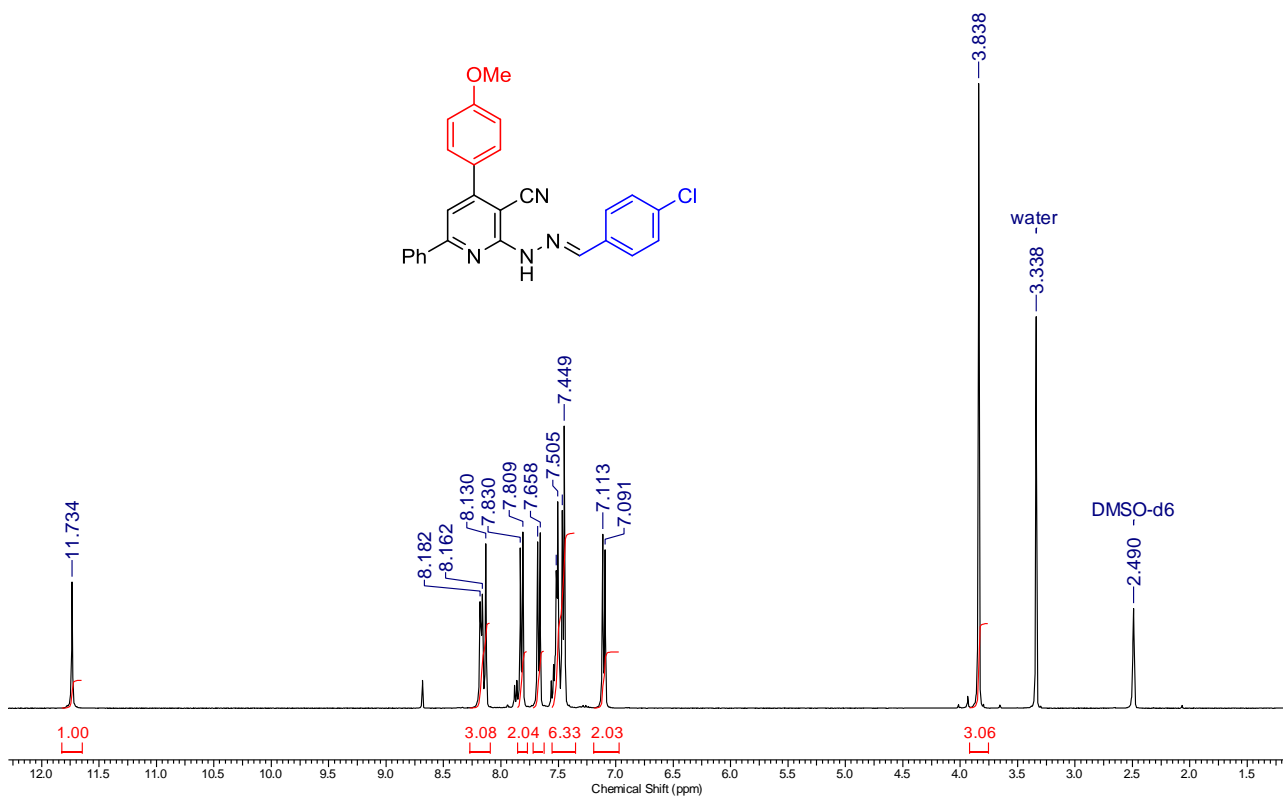

**Figure S97.**  $^{13}\text{C}$  NMR spectrum of hydrazone 21{19}, DMSO- $\text{d}_6$  (101 MHz)

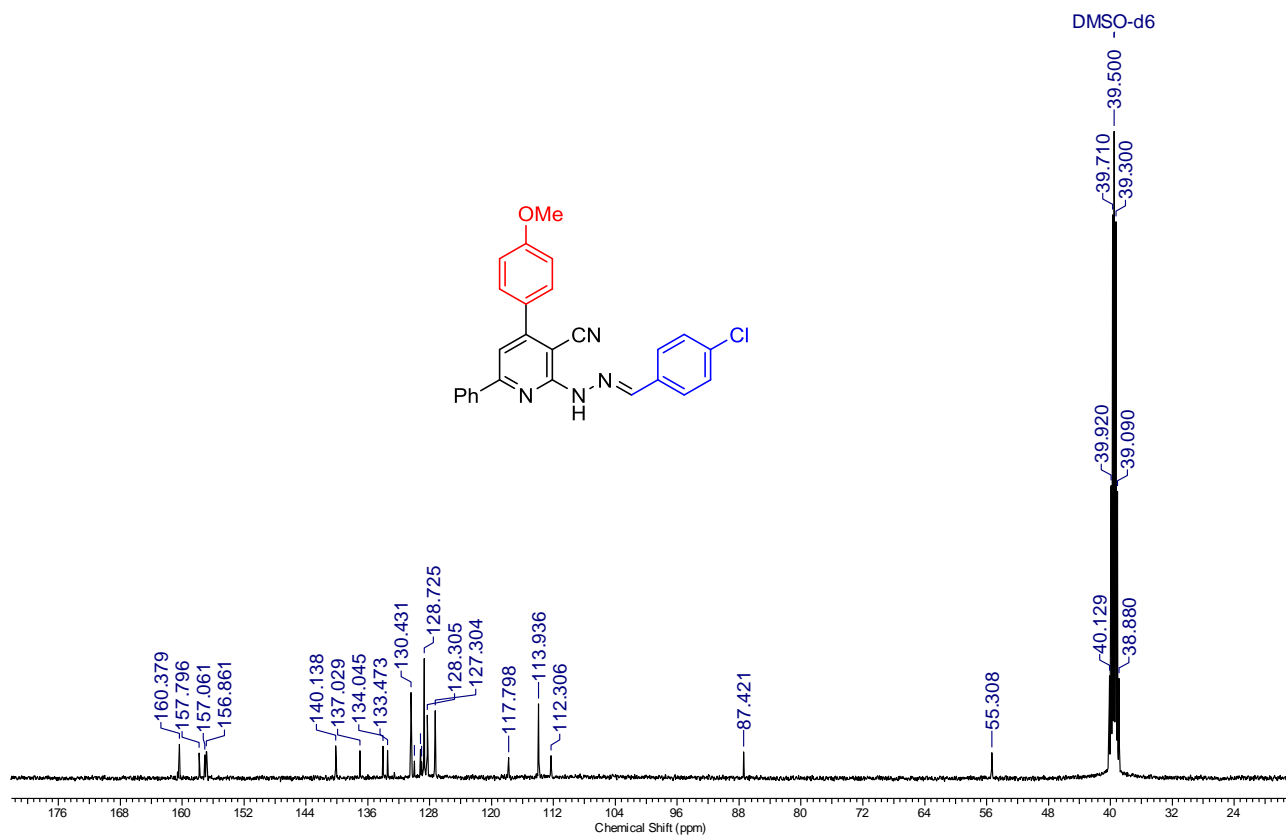

**Figure S98.** HRMS spectrum of hydrazone 21{19}

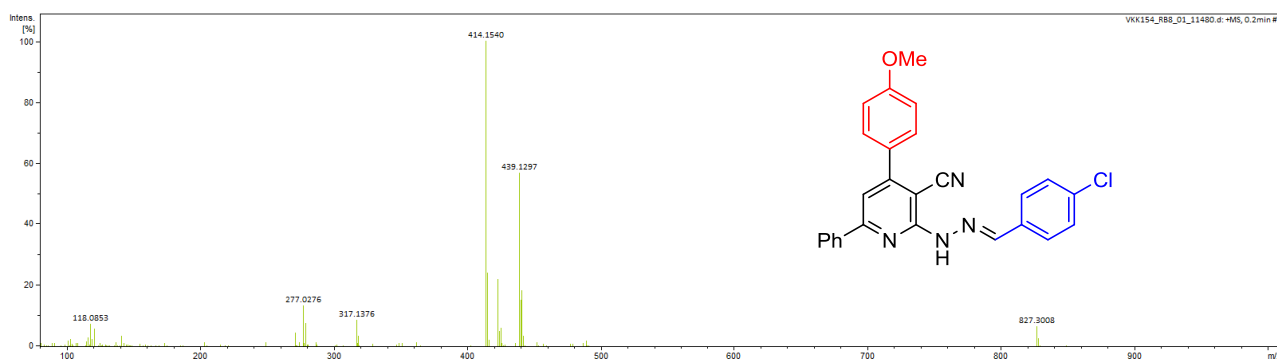

Figure S99. FTIR spectrum (nujol) of hydrazone 21{20}

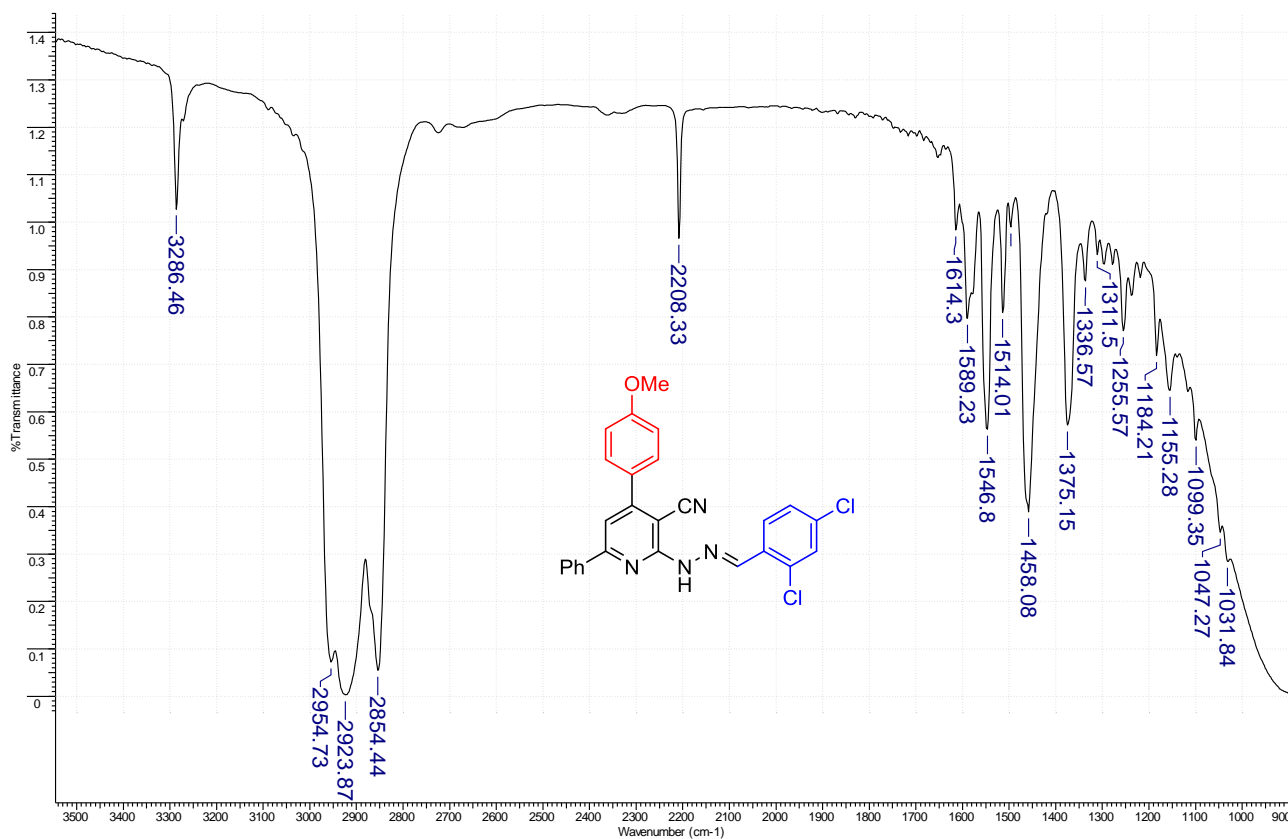

Figure S100. <sup>1</sup>H NMR spectrum of hydrazone 21{20}, DMSO-d<sub>6</sub> (400 MHz)

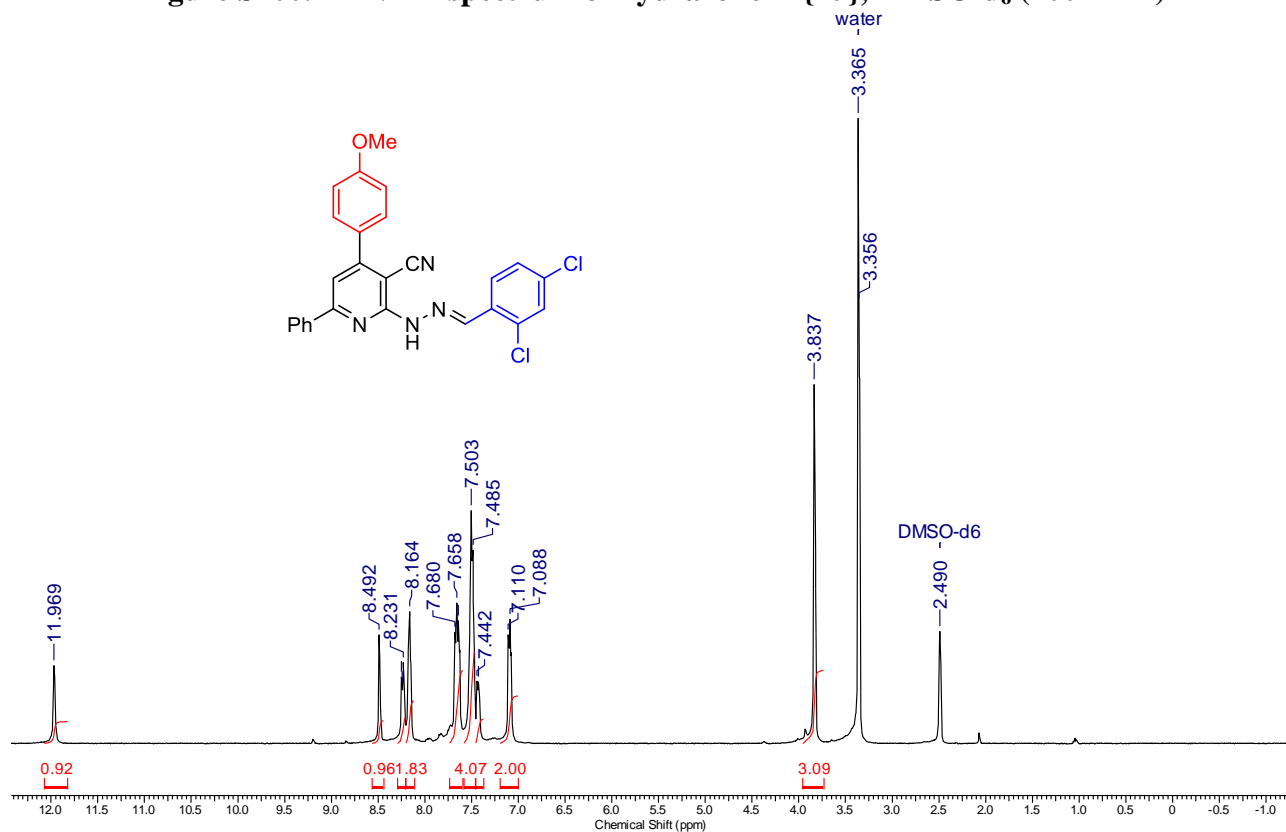

**Figure S101.**  $^{13}\text{C}$  NMR spectrum of hydrazone 21{20}, DMSO- $\text{d}_6$  (101 MHz)

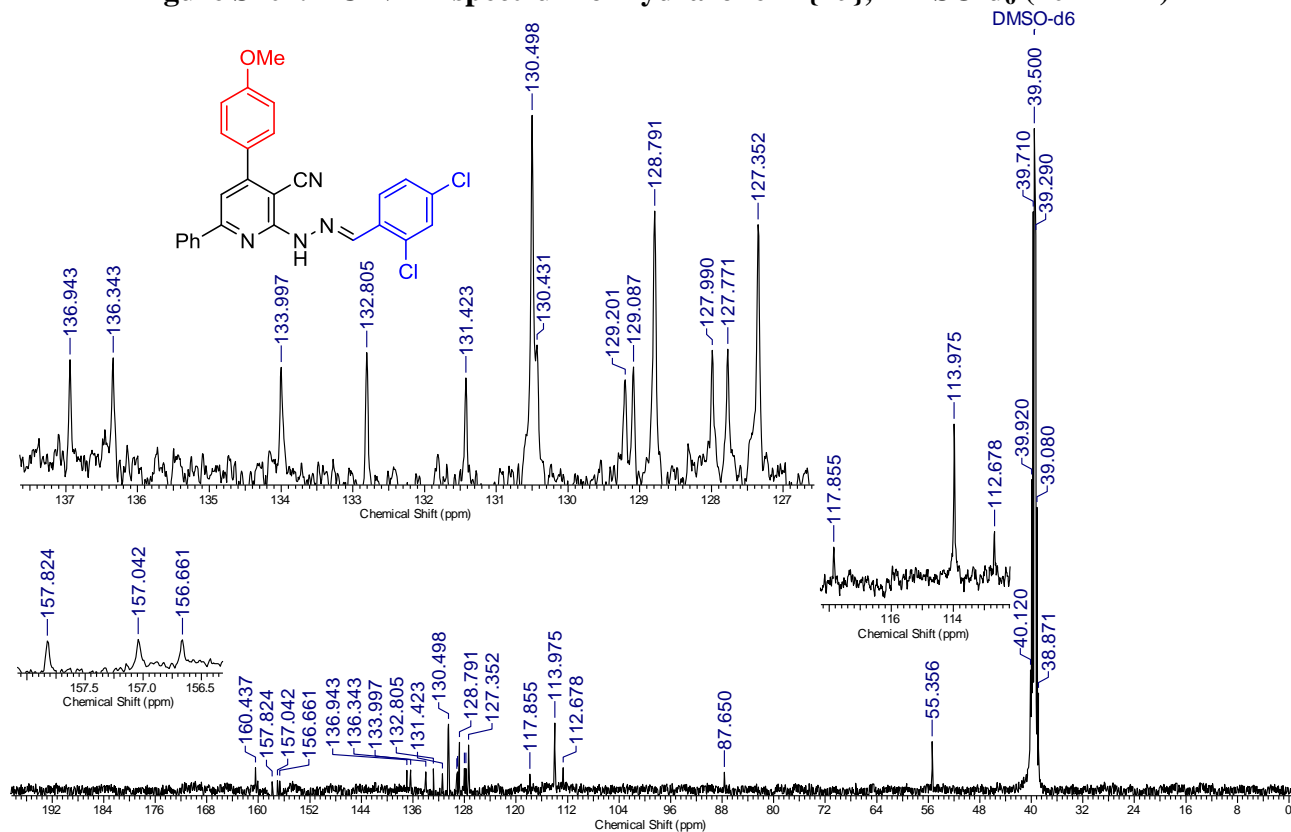

**Figure S102.** HRMS spectrum of hydrazone 21{20}

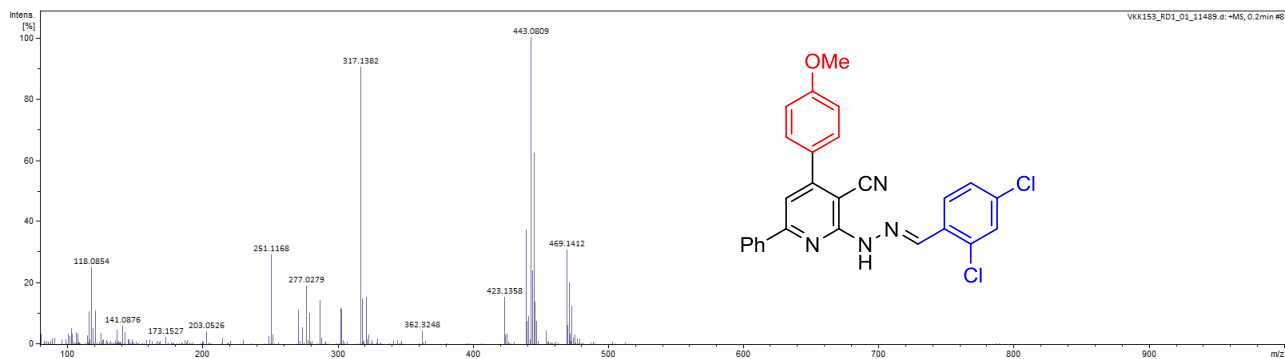

**Figure S103. ORTEP drawing of X-ray structure for 2-bromo-4-(4-chlorophenyl)-6-phenylnicotinonitrile (15a) with 50% probability (CCDC deposition number 2499675)**

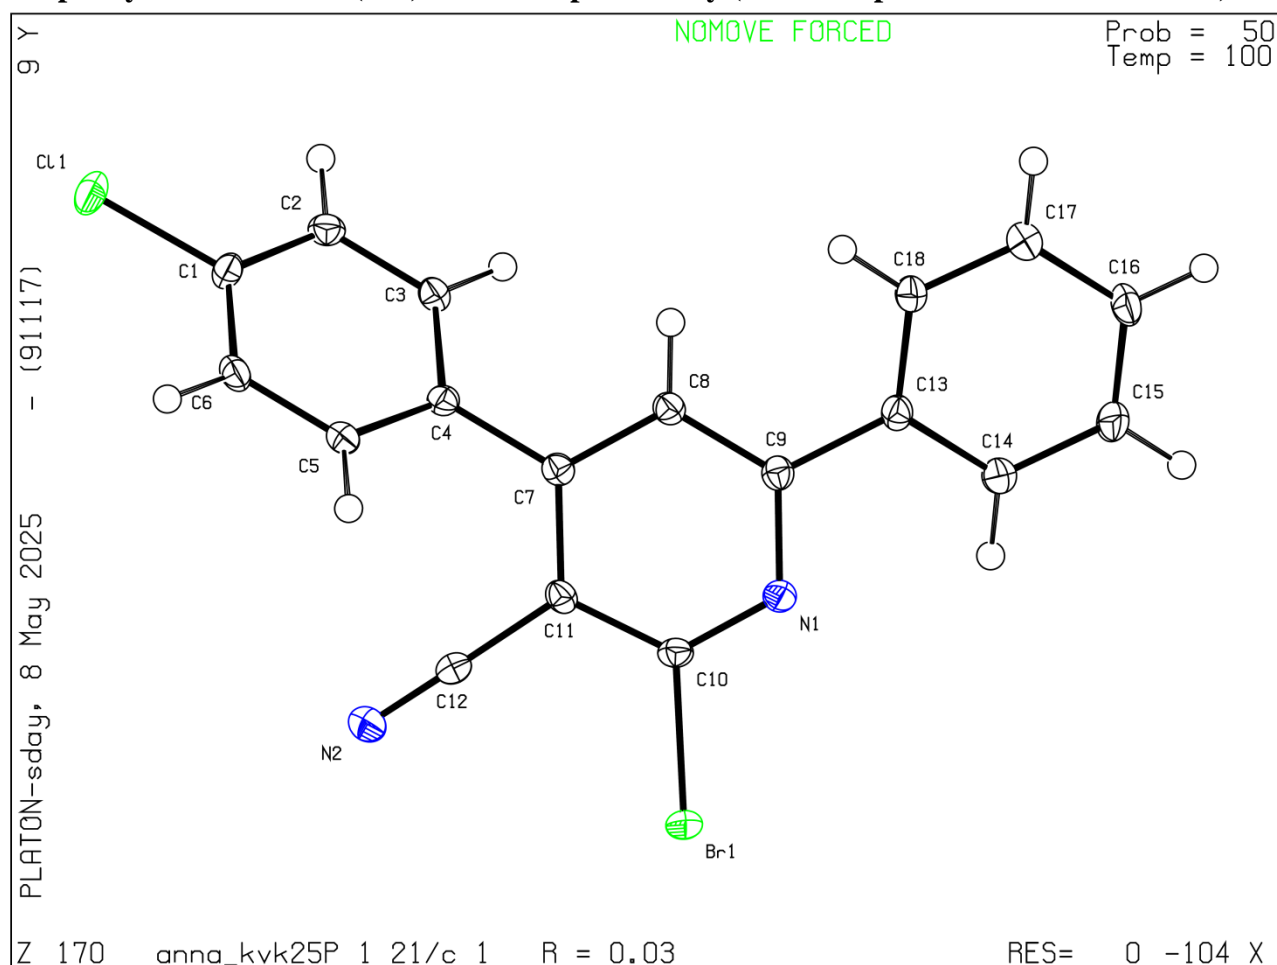

**Figure S104. Microphoto images of the single crystal of 2-bromo-4-(4-chlorophenyl)-6-phenylnicotinonitrile 15a**

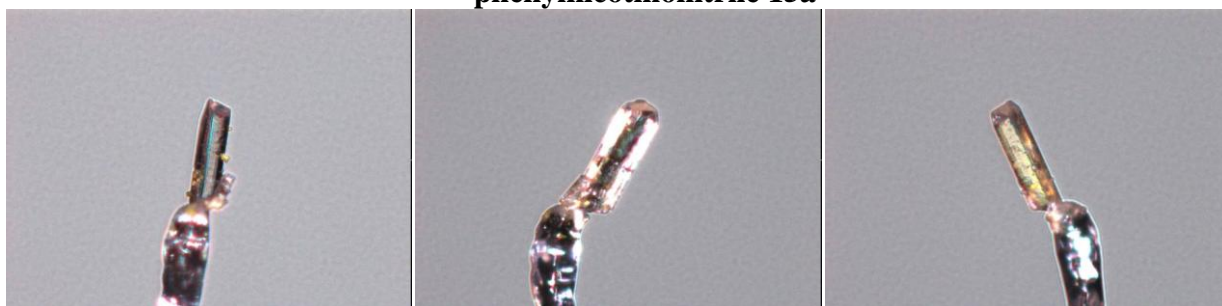

**Table S1. Crystal data and structure refinement for 2-bromo-4-(4-chlorophenyl)-6-phenylnicotinonitrile (15a)**

|                     |                                                    |
|---------------------|----------------------------------------------------|
| Identification code | <b>15a</b>                                         |
| Empirical formula   | C <sub>18</sub> H <sub>10</sub> BrClN <sub>2</sub> |
| Formula weight      | 369.64                                             |
| Temperature/K       | 100.00(11)                                         |
| Crystal system      | monoclinic                                         |
| Space group         | P2 <sub>1</sub> /c                                 |
| a/Å                 | 15.2876(4)                                         |

|                                                |                                                               |
|------------------------------------------------|---------------------------------------------------------------|
| b/Å                                            | 7.21330(10)                                                   |
| c/Å                                            | 15.3758(4)                                                    |
| $\alpha/^\circ$                                | 90                                                            |
| $\beta/^\circ$                                 | 118.885(3)                                                    |
| $\gamma/^\circ$                                | 90                                                            |
| Volume/Å <sup>3</sup>                          | 1484.61(7)                                                    |
| Z                                              | 4                                                             |
| $\rho_{\text{calc}}/\text{g}/\text{cm}^3$      | 1.654                                                         |
| $\mu/\text{mm}^{-1}$                           | 5.392                                                         |
| F(000)                                         | 736.0                                                         |
| Crystal size/mm <sup>3</sup>                   | $0.37 \times 0.103 \times 0.076$                              |
| Radiation                                      | Cu K $\alpha$ ( $\lambda = 1.54184$ )                         |
| 2 $\Theta$ range for data collection/ $^\circ$ | 6.604 to 152.484                                              |
| Index ranges                                   | $-19 \leq h \leq 19, -8 \leq k \leq 9, -19 \leq l \leq 19$    |
| Reflections collected                          | 10591                                                         |
| Independent reflections                        | 3098 [ $R_{\text{int}} = 0.0382, R_{\text{sigma}} = 0.0316$ ] |
| Data/restraints/parameters                     | 3098/0/199                                                    |
| Goodness-of-fit on $F^2$                       | 1.100                                                         |
| Final R indexes [ $I \geq 2\sigma(I)$ ]        | $R_1 = 0.0323, wR_2 = 0.0855$                                 |
| Final R indexes [all data]                     | $R_1 = 0.0332, wR_2 = 0.0865$                                 |
| Largest diff. peak/hole / e Å <sup>-3</sup>    | 0.41/-0.97                                                    |

**Table S2. Fractional Atomic Coordinates ( $\times 10^4$ ) and Equivalent Isotropic Displacement Parameters ( $\text{\AA}^2 \times 10^3$ ) for 2-bromo-4-(4-chlorophenyl)-6-phenylnicotinonitrile (15a).  $U_{\text{eq}}$  is defined as 1/3 of the trace of the orthogonalised  $U_{\text{ij}}$  tensor.**

| Atom | <i>x</i>    | <i>y</i>   | <i>z</i>    | $U(\text{eq})$ |
|------|-------------|------------|-------------|----------------|
| Br1  | 2543.3 (2)  | 3079.7 (3) | 4029.1 (2)  | 18.68 (10)     |
| Cl1  | 8777.1 (4)  | 4616.0 (8) | 9976.0 (4)  | 24.84 (14)     |
| N1   | 2363.8 (12) | 4402 (2)   | 5605.5 (12) | 14.7 (3)       |
| N2   | 5281.4 (14) | 2659 (3)   | 5405.1 (14) | 20.6 (4)       |
| C8   | 3699.6 (14) | 4991 (3)   | 7253.7 (14) | 13.7 (4)       |
| C12  | 4743.2 (15) | 3232 (3)   | 5660.0 (15) | 15.2 (4)       |
| C18  | 2091.4 (15) | 6536 (3)   | 7627.4 (15) | 15.6 (4)       |
| C13  | 1897.0 (14) | 5391 (3)   | 6817.9 (15) | 14.5 (4)       |
| C11  | 4077.2 (14) | 3921 (3)   | 5997.5 (14) | 13.6 (4)       |
| C7   | 4420.4 (14) | 4508 (3)   | 6982.5 (14) | 12.9 (4)       |
| C9   | 2684.3 (14) | 4927 (3)   | 6559.6 (15) | 13.8 (4)       |
| C10  | 3040.5 (15) | 3911 (3)   | 5359.7 (14) | 14.0 (4)       |
| C5   | 6204.9 (15) | 5231 (3)   | 7470.7 (15) | 14.2 (4)       |
| C4   | 5495.5 (14) | 4575 (3)   | 7721.3 (14) | 13.1 (4)       |
| C3   | 5815.0 (14) | 3983 (3)   | 8698.3 (14) | 14.4 (4)       |
| C17  | 1330.6 (17) | 7009 (3)   | 7828.0 (17) | 19.7 (4)       |
| C2   | 6822.0 (15) | 3994 (3)   | 9399.0 (14) | 15.9 (4)       |
| C1   | 7513.2 (14) | 4613 (3)   | 9122.4 (15) | 16.5 (4)       |
| C14  | 928.4 (15)  | 4694 (3)   | 6233.8 (16) | 18.6 (4)       |
| C6   | 7213.8 (15) | 5258 (3)   | 8169.0 (15) | 15.7 (4)       |
| C15  | 170.4 (16)  | 5172 (3)   | 6445.6 (16) | 22.7 (4)       |
| C16  | 365.9 (16)  | 6331 (3)   | 7239.0 (17) | 22.0 (4)       |

**Table S3. Anisotropic Displacement Parameters ( $\text{\AA}^2 \times 10^3$ ) for 2-bromo-4-(4-chlorophenyl)-6-phenylnicotinonitrile (15a). The Anisotropic displacement factor exponent takes the form: -  $2\pi^2[h^2a^{*2}U_{11}+2hka^*b^*U_{12}+\dots]$ .**

| Atom | U <sub>11</sub> | U <sub>22</sub> | U <sub>33</sub> | U <sub>23</sub> | U <sub>13</sub> | U <sub>12</sub> |
|------|-----------------|-----------------|-----------------|-----------------|-----------------|-----------------|
| Br1  | 16.36 (14)      | 28.64 (15)      | 10.13 (14)      | -1.44 (7)       | 5.67 (10)       | -0.08 (7)       |
| Cl1  | 11.5 (2)        | 38.7 (3)        | 19.2 (3)        | 2.0 (2)         | 3.39 (19)       | 0.45 (19)       |
| N1   | 14.0 (7)        | 18.4 (8)        | 12.2 (8)        | 0.9 (6)         | 6.8 (6)         | -0.8 (6)        |
| N2   | 19.4 (8)        | 27.6 (9)        | 16.4 (8)        | -0.3 (7)        | 9.9 (7)         | 2.7 (7)         |
| C8   | 14.0 (9)        | 14.6 (8)        | 13.8 (9)        | -0.1 (7)        | 7.7 (7)         | -0.1 (7)        |
| C12  | 14.5 (9)        | 17.5 (9)        | 11.3 (9)        | 0.2 (7)         | 4.3 (8)         | 0.2 (7)         |
| C18  | 13.3 (9)        | 17.5 (9)        | 17.0 (9)        | -0.5 (8)        | 8.1 (8)         | -1.1 (7)        |
| C13  | 12.6 (9)        | 17.0 (9)        | 14.3 (9)        | 3.1 (7)         | 6.8 (7)         | 0.5 (7)         |
| C11  | 14.5 (9)        | 14.7 (8)        | 14.1 (9)        | 1.6 (7)         | 9.0 (7)         | 0.8 (7)         |
| C7   | 14.2 (9)        | 12.6 (8)        | 12.7 (9)        | 2.0 (7)         | 7.3 (7)         | 0.8 (7)         |
| C9   | 13.3 (9)        | 13.4 (8)        | 15.2 (9)        | -0.1 (7)        | 7.3 (8)         | -0.9 (7)        |
| C10  | 15.7 (9)        | 15.7 (9)        | 10.5 (8)        | 0.0 (7)         | 6.3 (7)         | -0.9 (7)        |
| C5   | 15.2 (9)        | 15.4 (8)        | 14.1 (9)        | -0.5 (7)        | 8.6 (7)         | 0.2 (7)         |
| C4   | 13.4 (9)        | 12.7 (8)        | 12.7 (9)        | -1.6 (7)        | 6.0 (7)         | 0.5 (7)         |
| C3   | 14.2 (9)        | 15.8 (9)        | 15.3 (9)        | 0.1 (7)         | 8.9 (7)         | 0.3 (7)         |
| C17  | 17.7 (10)       | 23.9 (10)       | 19.3 (10)       | -1.1 (8)        | 10.4 (9)        | 0.8 (8)         |
| C2   | 17.7 (9)        | 17.8 (9)        | 12.3 (9)        | 0.5 (7)         | 7.3 (8)         | 1.1 (7)         |
| C1   | 10.6 (9)        | 19.7 (9)        | 15.8 (9)        | -2.2 (7)        | 3.7 (8)         | 0.7 (7)         |
| C14  | 15.7 (9)        | 24.5 (10)       | 16.9 (9)        | -2.1 (8)        | 8.9 (8)         | -3.2 (8)        |
| C6   | 14.7 (9)        | 17.7 (9)        | 18.5 (9)        | -1.5 (7)        | 11.1 (8)        | -0.7 (7)        |
| C15  | 12.9 (9)        | 36.9 (12)       | 19.1 (10)       | -1.3 (9)        | 8.4 (8)         | -4.8 (8)        |
| C16  | 14.8 (9)        | 33.4 (11)       | 21.9 (10)       | 2.2 (9)         | 12.2 (8)        | 2.4 (9)         |

**Table S4. Bond Lengths for 2-bromo-4-(4-chlorophenyl)-6-phenylnicotinonitrile (15a).**

| Atom | Atom | Length/ $\text{\AA}$ | Atom | Atom | Length/ $\text{\AA}$ |
|------|------|----------------------|------|------|----------------------|
| Br1  | C10  | 1.9028 (19)          | C11  | C7   | 1.407 (3)            |
| Cl1  | C1   | 1.7337 (19)          | C11  | C10  | 1.404 (3)            |
| N1   | C9   | 1.357 (3)            | C7   | C4   | 1.480 (3)            |
| N1   | C10  | 1.310 (3)            | C5   | C4   | 1.397 (3)            |
| N2   | C12  | 1.146 (3)            | C5   | C6   | 1.390 (3)            |
| C8   | C7   | 1.398 (3)            | C4   | C3   | 1.403 (3)            |
| C8   | C9   | 1.396 (3)            | C3   | C2   | 1.389 (3)            |
| C12  | C11  | 1.436 (3)            | C17  | C16  | 1.394 (3)            |
| C18  | C13  | 1.401 (3)            | C2   | C1   | 1.390 (3)            |
| C18  | C17  | 1.382 (3)            | C1   | C6   | 1.388 (3)            |
| C13  | C9   | 1.477 (3)            | C14  | C15  | 1.390 (3)            |
| C13  | C14  | 1.402 (3)            | C15  | C16  | 1.387 (3)            |



**Table S5. Bond Angles for 2-bromo-4-(4-chlorophenyl)-6-phenylnicotinonitrile (15a)**

| Atom | Atom | Atom | Angle/°     | Atom | Atom | Atom | Angle/°     |
|------|------|------|-------------|------|------|------|-------------|
| C10  | N1   | C9   | 117.67 (17) | N1   | C10  | C11  | 125.40 (18) |
| C9   | C8   | C7   | 120.61 (18) | C11  | C10  | Br1  | 118.84 (14) |
| N2   | C12  | C11  | 178.7 (2)   | C6   | C5   | C4   | 120.75 (18) |
| C17  | C18  | C13  | 120.24 (19) | C5   | C4   | C7   | 121.44 (17) |
| C18  | C13  | C9   | 121.47 (18) | C5   | C4   | C3   | 118.89 (18) |
| C18  | C13  | C14  | 119.04 (19) | C3   | C4   | C7   | 119.67 (17) |
| C14  | C13  | C9   | 119.48 (18) | C2   | C3   | C4   | 120.73 (18) |
| C7   | C11  | C12  | 122.15 (18) | C18  | C17  | C16  | 120.6 (2)   |
| C10  | C11  | C12  | 120.25 (18) | C3   | C2   | C1   | 119.10 (18) |
| C10  | C11  | C7   | 117.47 (17) | C2   | C1   | Cl1  | 120.19 (16) |
| C8   | C7   | C11  | 117.28 (18) | C6   | C1   | Cl1  | 118.52 (16) |
| C8   | C7   | C4   | 120.40 (17) | C6   | C1   | C2   | 121.29 (18) |
| C11  | C7   | C4   | 122.30 (17) | C15  | C14  | C13  | 120.2 (2)   |
| N1   | C9   | C8   | 121.53 (18) | C1   | C6   | C5   | 119.20 (18) |
| N1   | C9   | C13  | 116.01 (17) | C16  | C15  | C14  | 120.4 (2)   |
| C8   | C9   | C13  | 122.45 (18) | C15  | C16  | C17  | 119.6 (2)   |
| N1   | C10  | Br1  | 115.75 (14) |      |      |      |             |

**Table S6. Torsion Angles for 2-bromo-4-(4-chlorophenyl)-6-phenylnicotinonitrile (15a)**

| A   | B   | C   | D   | Angle/°      | A   | B   | C   | D   | Angle/°      |
|-----|-----|-----|-----|--------------|-----|-----|-----|-----|--------------|
| Cl1 | C1  | C6  | C5  | 178.75 (15)  | C9  | N1  | C10 | C11 | -1.5 (3)     |
| C8  | C7  | C4  | C5  | -139.90 (19) | C9  | C8  | C7  | C11 | -1.5 (3)     |
| C8  | C7  | C4  | C3  | 39.6 (3)     | C9  | C8  | C7  | C4  | -179.91 (17) |
| C12 | C11 | C7  | C8  | -174.26 (18) | C9  | C13 | C14 | C15 | -177.70 (19) |
| C12 | C11 | C7  | C4  | 4.1 (3)      | C10 | N1  | C9  | C8  | 1.6 (3)      |
| C12 | C11 | C10 | Br1 | -2.8 (2)     | C10 | N1  | C9  | C13 | -177.44 (17) |
| C12 | C11 | C10 | N1  | 175.80 (19)  | C10 | C11 | C7  | C8  | 1.6 (3)      |
| C18 | C13 | C9  | N1  | -157.30 (18) | C10 | C11 | C7  | C4  | 179.97 (17)  |
| C18 | C13 | C9  | C8  | 23.7 (3)     | C5  | C4  | C3  | C2  | -1.9 (3)     |
| C18 | C13 | C14 | C15 | 1.4 (3)      | C4  | C5  | C6  | C1  | 0.4 (3)      |
| C18 | C17 | C16 | C15 | 0.0 (3)      | C4  | C3  | C2  | C1  | 0.4 (3)      |
| C13 | C18 | C17 | C16 | 1.0 (3)      | C3  | C2  | C1  | Cl1 | -179.16 (15) |
| C13 | C14 | C15 | C16 | -0.4 (3)     | C3  | C2  | C1  | C6  | 1.5 (3)      |
| C11 | C7  | C4  | C5  | 41.7 (3)     | C17 | C18 | C13 | C9  | 177.37 (19)  |
| C11 | C7  | C4  | C3  | -138.71 (19) | C17 | C18 | C13 | C14 | -1.8 (3)     |
| C7  | C8  | C9  | N1  | -0.1 (3)     | C2  | C1  | C6  | C5  | -1.9 (3)     |
| C7  | C8  | C9  | C13 | 178.85 (18)  | C14 | C13 | C9  | N1  | 21.8 (3)     |
| C7  | C11 | C10 | Br1 | -178.75 (14) | C14 | C13 | C9  | C8  | -157.18 (19) |
| C7  | C11 | C10 | N1  | -0.1 (3)     | C14 | C15 | C16 | C17 | -0.3 (3)     |
| C7  | C4  | C3  | C2  | 178.56 (18)  | C6  | C5  | C4  | C7  | -178.98 (18) |
| C9  | N1  | C10 | Br1 | 177.20 (14)  | C6  | C5  | C4  | C3  | 1.5 (3)      |

**Table S7. Hydrogen Atom Coordinates ( $\text{\AA} \times 10^4$ ) and Isotropic Displacement Parameters ( $\text{\AA}^2 \times 10^3$ ) for 2-bromo-4-(4-chlorophenyl)-6-phenylnicotinonitrile (**15a**).**

| Atom | x       | y       | z        | U(eq) |
|------|---------|---------|----------|-------|
| H8   | 3902.31 | 5365.97 | 7916.44  | 16    |
| H18  | 2748.44 | 6988.95 | 8040.11  | 19    |
| H5   | 5995.37 | 5662.93 | 6815.66  | 17    |
| H3   | 5337.17 | 3569.25 | 8882.37  | 17    |
| H17  | 1466.21 | 7802.93 | 8371.84  | 24    |
| H2   | 7035.48 | 3584.2  | 10058.47 | 19    |
| H14  | 790.02  | 3893.52 | 5691.88  | 22    |
| H6   | 7692.6  | 5712.39 | 7995.84  | 19    |
| H15  | -485.16 | 4702.13 | 6044.7   | 27    |
| H16  | -154.25 | 6661.22 | 7380.04  | 26    |

### Experimental

Single crystals of  $\text{C}_{18}\text{H}_{10}\text{BrClN}_2$  (2-bromo-4-(4-chlorophenyl)-6-phenylnicotinonitrile (**15a**)) were isolated from mother liquor (AcOH solution). A suitable crystal was selected and studied on a SuperNova, Dual, Cu at home/near, AtlasS2 diffractometer. The crystal was kept at 100.00(11) K during data collection. Using Olex2 [1], the structure was solved with the SHELXT [2] structure solution program using Intrinsic Phasing and refined with the SHELXL [3] refinement package using Least Squares minimisation.

1. Dolomanov, O.V., Bourhis, L.J., Gildea, R.J., Howard, J.A.K. & Puschmann, H. (2009), *J. Appl. Cryst.* 42, 339-341.
2. Sheldrick, G.M. (2015). *Acta Cryst.* A71, 3-8.
3. Sheldrick, G.M. (2015). *Acta Cryst.* C71, 3-8.

### Crystal structure determination of 2-bromo-4-(4-chlorophenyl)-6-phenylnicotinonitrile (**15a**)

**Crystal Data** for  $\text{C}_{18}\text{H}_{10}\text{BrClN}_2$  ( $M = 369.64$  g/mol): monoclinic, space group  $P2_1/c$  (no. 14),  $a = 15.2876(4)$  Å,  $b = 7.21330(10)$  Å,  $c = 15.3758(4)$  Å,  $\beta = 118.885(3)^\circ$ ,  $V = 1484.61(7)$  Å<sup>3</sup>,  $Z = 4$ ,  $T = 100.00(11)$  K,  $\mu(\text{Cu K}\alpha) = 5.392$  mm<sup>-1</sup>,  $D_{\text{calc}} = 1.654$  g/cm<sup>3</sup>, 10591 reflections measured ( $6.604^\circ \leq 2\theta \leq 152.484^\circ$ ), 3098 unique ( $R_{\text{int}} = 0.0382$ ,  $R_{\text{sigma}} = 0.0316$ ) which were used in all calculations. The final  $R_1$  was 0.0323 ( $I > 2\sigma(I)$ ) and  $wR_2$  was 0.0865 (all data).

**Figure S105.** ORTEP drawings of X-ray structures for co-crystallized (2*S*\*,3*R*\*,4*S*\*,6*R*\*)-3-benzoyl-5-bromo-4-hydroxy-4-phenyl-2,6-di-*p*-tolylcyclohexane-1,1-dicarbonitrile 17-Br (upper image) and (2*S*\*,3*R*\*,4*S*\*,6*R*\*)-3-benzoyl-4-hydroxy-4-phenyl-2,6-di-*p*-tolylcyclohexane-1,1-dicarbonitrile 17 (bottom image), solvate with AcOH. Ellipsoids are given with 50% probability (CCDC deposition number 2499676).

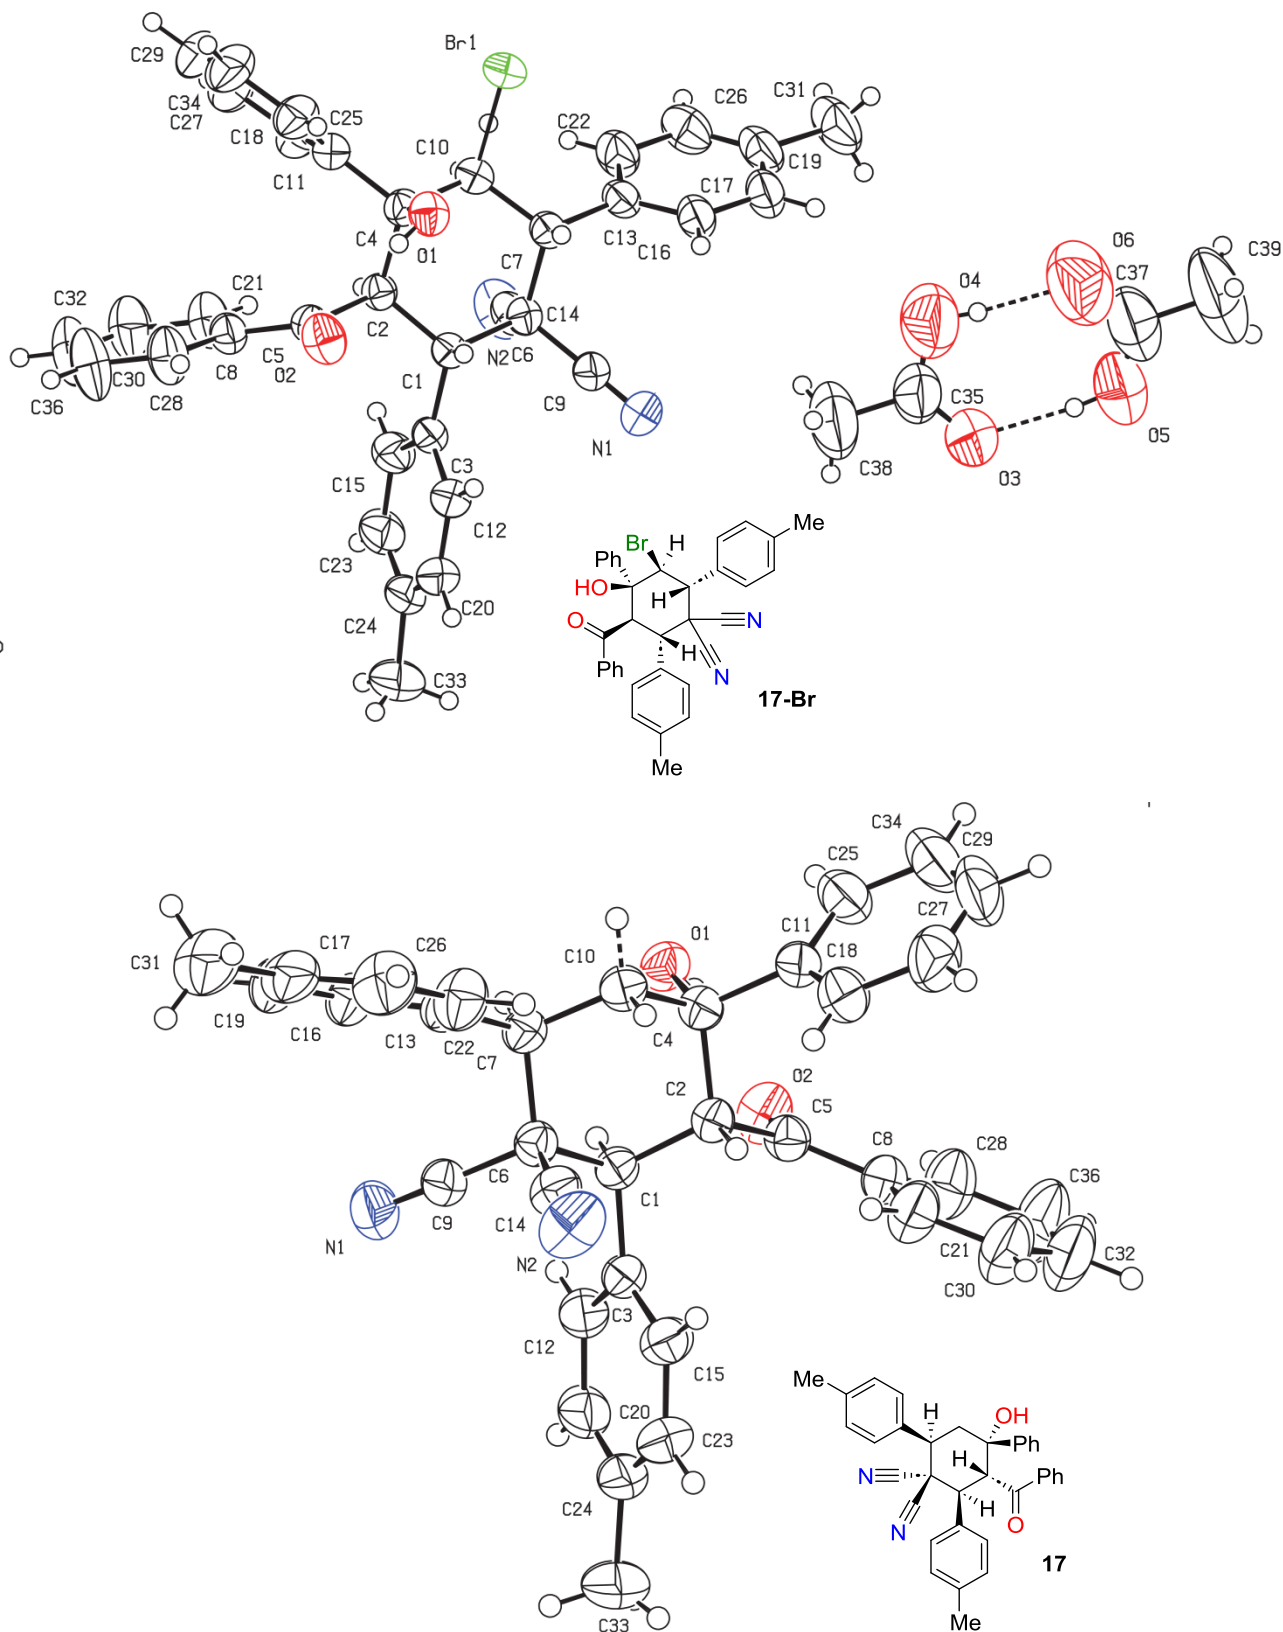

**Figure S106. Microphoto images of the single crystal of 17 + 17-Br co-crystals**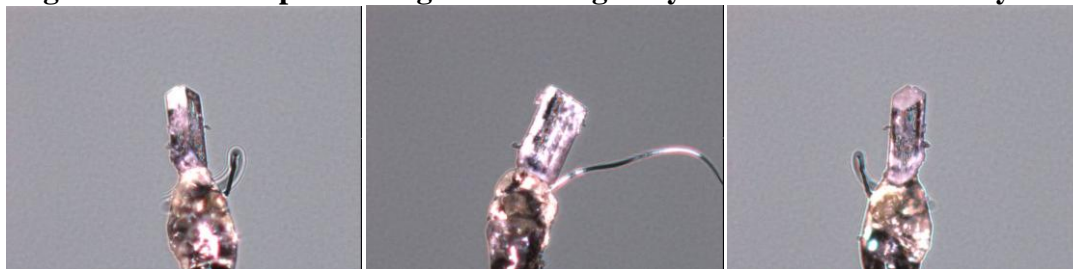**Table S8. Crystal data and structure refinement for co-crystals of cyclohexanols 17 + 17-Br**

|                                                |                                                                |
|------------------------------------------------|----------------------------------------------------------------|
| Identification code                            | <b>17 + 17-Br</b>                                              |
| Empirical formula                              | $C_{39}H_{37.39}Br_{0.61}N_2O_6$                               |
| Formula weight                                 | 678.84                                                         |
| Temperature/K                                  | 293(2)                                                         |
| Crystal system                                 | triclinic                                                      |
| Space group                                    | P-1                                                            |
| a/Å                                            | 11.7101(2)                                                     |
| b/Å                                            | 12.1777(2)                                                     |
| c/Å                                            | 13.1548(3)                                                     |
| $\alpha/^\circ$                                | 105.5935(16)                                                   |
| $\beta/^\circ$                                 | 95.2886(16)                                                    |
| $\gamma/^\circ$                                | 91.2975(15)                                                    |
| Volume/Å <sup>3</sup>                          | 1796.97(6)                                                     |
| Z                                              | 2                                                              |
| $\rho_{\text{calc}}/\text{g cm}^{-3}$          | 1.255                                                          |
| $\mu/\text{mm}^{-1}$                           | 1.436                                                          |
| F(000)                                         | 709.0                                                          |
| Crystal size/mm <sup>3</sup>                   | 0.31 × 0.14 × 0.11                                             |
| Radiation                                      | Cu K $\alpha$ ( $\lambda$ = 1.54184)                           |
| 2 $\theta$ range for data collection/ $^\circ$ | 7.014 to 152.508                                               |
| Index ranges                                   | -14 ≤ h ≤ 14, -15 ≤ k ≤ 13, -16 ≤ l ≤ 16                       |
| Reflections collected                          | 26097                                                          |
| Independent reflections                        | 7469 [ $R_{\text{int}}$ = 0.0156, $R_{\text{sigma}}$ = 0.0143] |
| Data/restraints/parameters                     | 7469/1/444                                                     |
| Goodness-of-fit on $F^2$                       | 1.144                                                          |
| Final R indexes [ $I \geq 2\sigma(I)$ ]        | $R_1$ = 0.0527, $wR_2$ = 0.1359                                |
| Final R indexes [all data]                     | $R_1$ = 0.0538, $wR_2$ = 0.1366                                |
| Largest diff. peak/hole / e Å <sup>-3</sup>    | 0.64/-0.42                                                     |

**Table S9. Fractional Atomic Coordinates ( $\times 10^4$ ) and Equivalent Isotropic Displacement Parameters ( $\text{\AA}^2 \times 10^3$ ) for co-crystals of cyclohexanols 17 + 17-Br.  $U_{\text{eq}}$  is defined as 1/3 of of the trace of the orthogonalised  $U_{\text{IJ}}$  tensor.**

| Atom | x           | y           | z           | $U(\text{eq})$ |
|------|-------------|-------------|-------------|----------------|
| Br1  | 7557.5 (3)  | 3969.5 (4)  | 7329.2 (3)  | 61.32 (15)     |
| O1   | 6642.1 (13) | 4337.8 (11) | 5210.1 (12) | 49.2 (3)       |
| O2   | 5951.0 (16) | 3601.4 (13) | 3085.8 (13) | 59.2 (4)       |
| O3   | -387 (3)    | 5881 (4)    | 9045 (2)    | 151.4 (15)     |
| O4   | 1436 (3)    | 6329 (4)    | 9522 (3)    | 150.5 (14)     |

|     |             |             |             |            |
|-----|-------------|-------------|-------------|------------|
| O5  | -880 (4)    | 6988 (6)    | 10953 (4)   | 192 (2)    |
| O6  | 841 (5)     | 7626 (4)    | 11320 (4)   | 187 (2)    |
| N1  | 2332.0 (19) | 3783 (2)    | 5913.0 (18) | 73.4 (6)   |
| N2  | 4103 (3)    | 690.3 (19)  | 5692.0 (19) | 77.2 (7)   |
| C1  | 4551.0 (15) | 2868.7 (15) | 4466.6 (14) | 37.3 (4)   |
| C2  | 5758.7 (16) | 2459.1 (15) | 4258.2 (14) | 37.7 (4)   |
| C3  | 3610.2 (16) | 2276.2 (17) | 3609.5 (14) | 41.5 (4)   |
| C4  | 6685.2 (16) | 3158.3 (16) | 5142.3 (15) | 41.1 (4)   |
| C5  | 6035.1 (17) | 2642.5 (17) | 3192.2 (15) | 42.3 (4)   |
| C6  | 4275.1 (16) | 2802.2 (16) | 5599.2 (15) | 40.0 (4)   |
| C7  | 5218.4 (16) | 3469.9 (17) | 6502.4 (14) | 41.0 (4)   |
| C8  | 6438.8 (18) | 1714.7 (19) | 2342.2 (16) | 48.9 (5)   |
| C9  | 3163.8 (18) | 3330.2 (19) | 5788.4 (16) | 49.0 (5)   |
| C10 | 6396.1 (17) | 3040.2 (18) | 6221.7 (15) | 45.4 (4)   |
| C11 | 7868.2 (17) | 2710.2 (19) | 4899.7 (16) | 47.9 (5)   |
| C12 | 2838.4 (18) | 2939 (2)    | 3202.1 (17) | 49.9 (5)   |
| C13 | 4919.1 (18) | 3418.8 (18) | 7589.7 (15) | 46.6 (4)   |
| C14 | 4159 (2)    | 1603.6 (18) | 5645.1 (16) | 50.0 (5)   |
| C15 | 3466 (2)    | 1094.7 (19) | 3224.1 (18) | 54.4 (5)   |
| C16 | 4228 (2)    | 4232 (2)    | 8143.1 (17) | 54.9 (5)   |
| C17 | 4240 (2)    | 3326 (3)    | 9564.5 (18) | 68.3 (7)   |
| C18 | 8079 (2)    | 1577 (2)    | 4825 (2)    | 62.7 (6)   |
| C19 | 3882 (2)    | 4176 (2)    | 9112.0 (19) | 66.2 (7)   |
| C20 | 1934 (2)    | 2436 (2)    | 2461.4 (19) | 61.3 (6)   |
| C21 | 6521 (3)    | 605 (2)     | 2397 (2)    | 66.3 (7)   |
| C22 | 5288 (2)    | 2577 (2)    | 8053.7 (19) | 63.7 (6)   |
| C23 | 2541 (2)    | 607 (2)     | 2488 (2)    | 65.8 (7)   |
| C24 | 1755 (2)    | 1271 (3)    | 2110.5 (18) | 64.6 (7)   |
| C25 | 8729 (2)    | 3402 (3)    | 4711 (2)    | 65.1 (6)   |
| C26 | 4956 (3)    | 2542 (3)    | 9030 (2)    | 74.0 (7)   |
| C27 | 9137 (3)    | 1153 (3)    | 4553 (2)    | 81.3 (9)   |
| C28 | 6776 (3)    | 1992 (3)    | 1450 (2)    | 74.1 (8)   |
| C29 | 9985 (2)    | 1863 (4)    | 4377 (3)    | 89.9 (11)  |
| C30 | 6924 (3)    | -220 (3)    | 1577 (3)    | 87.4 (10)  |
| C31 | 3846 (3)    | 3262 (3)    | 10611 (2)   | 94.4 (11)  |
| C32 | 7241 (4)    | 65 (3)      | 701 (3)     | 98.0 (11)  |
| C33 | 712 (3)     | 736 (4)     | 1361 (3)    | 98.9 (12)  |
| C34 | 9782 (2)    | 2975 (4)    | 4460 (3)    | 86.5 (10)  |
| C35 | 605 (4)     | 5887 (4)    | 8827 (3)    | 99.9 (11)  |
| C36 | 7170 (4)    | 1167 (3)    | 637 (3)     | 104.1 (12) |
| C37 | -128 (7)    | 7541 (5)    | 11579 (4)   | 134 (2)    |
| C38 | 904 (5)     | 5331 (5)    | 7750 (4)    | 149 (2)    |
| C39 | -405 (7)    | 8134 (6)    | 12666 (4)   | 201 (3)    |

**Table S10. Anisotropic Displacement Parameters ( $\text{\AA}^2 \times 10^3$ ) for co-crystals of cyclohexanols 17 + 17-Br. The Anisotropic displacement factor exponent takes the form: -  $2\pi^2[h^2a^{*2}U_{11}+2hka^*b^*U_{12}+\dots]$ .**

| Atom | $U_{11}$  | $U_{22}$   | $U_{33}$  | $U_{23}$  | $U_{13}$   | $U_{12}$   |
|------|-----------|------------|-----------|-----------|------------|------------|
| Br1  | 47.3 (2)  | 83.5 (3)   | 43.4 (2)  | 4.49 (18) | -6.44 (15) | 0.64 (18)  |
| O1   | 55.2 (8)  | 39.0 (7)   | 51.3 (8)  | 7.8 (6)   | 8.6 (7)    | -1.7 (6)   |
| O2   | 80.7 (11) | 51.7 (9)   | 52.5 (9)  | 24.1 (7)  | 13.9 (8)   | 6.5 (8)    |
| O3   | 108 (2)   | 253 (4)    | 80.0 (18) | 20 (2)    | 13.4 (16)  | 50 (3)     |
| O4   | 131 (3)   | 175 (4)    | 129 (3)   | 5 (3)     | 45 (2)     | -18 (2)    |
| O5   | 148 (4)   | 303 (6)    | 94 (3)    | -9 (3)    | 38 (3)     | 16 (4)     |
| O6   | 203 (5)   | 169 (4)    | 146 (4)   | -33 (3)   | 37 (3)     | -22 (3)    |
| N1   | 50.4 (12) | 100.1 (17) | 62.3 (13) | 7.1 (12)  | 9.3 (9)    | 17.1 (11)  |
| N2   | 115 (2)   | 54.6 (12)  | 66.9 (14) | 23.7 (10) | 16.7 (13)  | -7.0 (12)  |
| C1   | 39.0 (9)  | 37.0 (8)   | 35.8 (9)  | 10.0 (7)  | 3.2 (7)    | 1.5 (7)    |
| C2   | 40.3 (9)  | 36.9 (9)   | 36.6 (9)  | 10.8 (7)  | 5.1 (7)    | 2.7 (7)    |
| C3   | 40.0 (9)  | 48.7 (10)  | 34.2 (9)  | 8.9 (8)   | 3.6 (7)    | -0.2 (8)   |
| C4   | 39.0 (9)  | 40.7 (9)   | 42.6 (10) | 9.8 (8)   | 4.3 (7)    | 1.1 (7)    |
| C5   | 42.6 (10) | 44.5 (10)  | 41.2 (10) | 14.0 (8)  | 5.4 (8)    | -0.2 (8)   |
| C6   | 41.6 (9)  | 40.8 (9)   | 37.9 (9)  | 10.5 (7)  | 6.5 (7)    | 1.9 (7)    |
| C7   | 43.0 (10) | 43.8 (10)  | 35.2 (9)  | 9.3 (7)   | 3.9 (7)    | 1.0 (8)    |
| C8   | 48.4 (11) | 55.9 (12)  | 40.9 (10) | 9.6 (9)   | 8.4 (8)    | 0.4 (9)    |
| C9   | 42.1 (11) | 61.8 (12)  | 40.4 (10) | 8.9 (9)   | 5.8 (8)    | 0.3 (9)    |
| C10  | 43.6 (10) | 52.5 (11)  | 38.7 (10) | 11.2 (8)  | 0.9 (8)    | 3.3 (8)    |
| C11  | 39.7 (10) | 58.6 (12)  | 41.1 (10) | 6.8 (9)   | 2.3 (8)    | 3.8 (9)    |
| C12  | 47.8 (11) | 57.2 (12)  | 44.4 (11) | 13.8 (9)  | 2.1 (8)    | 5.2 (9)    |
| C13  | 48.6 (11) | 54.0 (11)  | 35.5 (9)  | 10.4 (8)  | 2.6 (8)    | -1.4 (9)   |
| C14  | 60.8 (13) | 49.0 (11)  | 41.1 (10) | 13.7 (8)  | 7.3 (9)    | -5.1 (9)   |
| C15  | 55.9 (12) | 49.6 (11)  | 51.3 (12) | 4.9 (9)   | -0.4 (10)  | -0.4 (9)   |
| C16  | 61.6 (13) | 59.7 (13)  | 40.8 (11) | 8.0 (9)   | 9.5 (9)    | 2.7 (10)   |
| C17  | 75.8 (17) | 88.5 (18)  | 36.9 (11) | 12.1 (11) | 6.5 (11)   | -18.4 (14) |
| C18  | 50.7 (13) | 66.0 (14)  | 68.0 (15) | 11.8 (12) | 4.5 (11)   | 15.0 (11)  |
| C19  | 68.4 (15) | 81.0 (17)  | 43.7 (12) | 5.2 (11)  | 14.7 (11)  | -1.6 (13)  |
| C20  | 46.6 (12) | 86.5 (17)  | 49.2 (12) | 17.0 (12) | -0.9 (9)   | 9.2 (11)   |
| C21  | 85.0 (18) | 52.5 (13)  | 60.5 (14) | 7.9 (11)  | 25.1 (13)  | 1.4 (12)   |
| C22  | 76.6 (16) | 73.2 (15)  | 45.9 (12) | 22.5 (11) | 8.8 (11)   | 14.2 (13)  |
| C23  | 63.2 (15) | 61.7 (14)  | 58.3 (14) | -5.4 (11) | 1.3 (11)   | -12.1 (11) |
| C24  | 46.7 (12) | 92.4 (19)  | 43.0 (11) | 0.3 (12)  | 1.4 (9)    | -7.6 (12)  |
| C25  | 45.3 (12) | 84.2 (17)  | 66.6 (15) | 21.4 (13) | 8.6 (11)   | -2.4 (11)  |
| C26  | 91 (2)    | 87.8 (19)  | 50.0 (13) | 32.7 (13) | 3.2 (13)   | 3.7 (16)   |
| C27  | 70.5 (18) | 94 (2)     | 72.4 (18) | 7.9 (15)  | 3.7 (14)   | 39.2 (16)  |
| C28  | 94 (2)    | 77.9 (17)  | 57.4 (15) | 22.3 (13) | 31.2 (14)  | 10.7 (15)  |
| C29  | 49.3 (15) | 146 (3)    | 74.5 (19) | 25 (2)    | 17.4 (13)  | 33.9 (18)  |
| C30  | 115 (3)   | 60.5 (16)  | 79 (2)    | -2.5 (14) | 36.2 (19)  | 4.6 (16)   |
| C31  | 112 (3)   | 127 (3)    | 44.6 (14) | 23.4 (16) | 16.8 (15)  | -21 (2)    |
| C32  | 124 (3)   | 86 (2)     | 74 (2)    | -8.0 (17) | 46 (2)     | 7 (2)      |
| C33  | 63.1 (18) | 136 (3)    | 73 (2)    | -4.1 (19) | -16.9 (15) | -14.9 (18) |
| C34  | 45.1 (14) | 134 (3)    | 85 (2)    | 36 (2)    | 15.9 (13)  | 4.4 (16)   |

**Table S10. Anisotropic Displacement Parameters ( $\text{\AA}^2 \times 10^3$ ) for co-crystals of cyclohexanols 17 + 17-Br. The Anisotropic displacement factor exponent takes the form: -  $2\pi^2[h^2a^{*2}U_{11}+2hka^*b^*U_{12}+\dots]$ .**

| Atom | $U_{11}$ | $U_{22}$ | $U_{33}$  | $U_{23}$  | $U_{13}$ | $U_{12}$ |
|------|----------|----------|-----------|-----------|----------|----------|
| C35  | 102 (3)  | 126 (3)  | 78 (2)    | 31 (2)    | 28 (2)   | 31 (2)   |
| C36  | 145 (3)  | 108 (3)  | 63.2 (18) | 16.5 (18) | 55 (2)   | 10 (2)   |
| C37  | 188 (6)  | 131 (4)  | 83 (3)    | 18 (3)    | 33 (4)   | 51 (4)   |
| C38  | 172 (5)  | 184 (5)  | 91 (3)    | 23 (3)    | 57 (3)   | 46 (4)   |
| C39  | 321 (10) | 181 (6)  | 91 (3)    | 0 (4)     | 60 (5)   | 77 (6)   |

**Table S11. Bond Lengths for co-crystals of cyclohexanols 17 + 17-Br.**

| Atom | Atom | Length/ $\text{\AA}$ | Atom | Atom | Length/ $\text{\AA}$ |
|------|------|----------------------|------|------|----------------------|
| Br1  | C10  | 1.983 (2)            | C8   | C28  | 1.393 (3)            |
| O1   | C4   | 1.417 (2)            | C11  | C18  | 1.386 (3)            |
| O2   | C5   | 1.218 (2)            | C11  | C25  | 1.381 (3)            |
| O3   | C35  | 1.222 (5)            | C12  | C20  | 1.380 (3)            |
| O4   | C35  | 1.273 (5)            | C13  | C16  | 1.387 (3)            |
| O5   | C37  | 1.203 (8)            | C13  | C22  | 1.384 (3)            |
| O6   | C37  | 1.224 (7)            | C15  | C23  | 1.389 (3)            |
| N1   | C9   | 1.134 (3)            | C16  | C19  | 1.391 (3)            |
| N2   | C14  | 1.131 (3)            | C17  | C19  | 1.381 (4)            |
| C1   | C2   | 1.534 (2)            | C17  | C26  | 1.375 (4)            |
| C1   | C3   | 1.518 (3)            | C17  | C31  | 1.512 (3)            |
| C2   | C6   | 1.576 (2)            | C18  | C27  | 1.393 (4)            |
| C2   | C4   | 1.564 (3)            | C20  | C24  | 1.373 (4)            |
| C2   | C5   | 1.539 (3)            | C21  | C30  | 1.389 (4)            |
| C3   | C12  | 1.390 (3)            | C22  | C26  | 1.387 (3)            |
| C3   | C15  | 1.392 (3)            | C23  | C24  | 1.384 (4)            |
| C4   | C10  | 1.532 (3)            | C24  | C33  | 1.512 (3)            |
| C4   | C11  | 1.530 (3)            | C25  | C34  | 1.382 (4)            |
| C5   | C8   | 1.481 (3)            | C27  | C29  | 1.378 (5)            |
| C6   | C7   | 1.578 (3)            | C28  | C36  | 1.379 (4)            |
| C6   | C9   | 1.477 (3)            | C29  | C34  | 1.358 (5)            |
| C6   | C14  | 1.481 (3)            | C30  | C32  | 1.369 (5)            |
| C7   | C10  | 1.528 (3)            | C32  | C36  | 1.371 (5)            |
| C7   | C13  | 1.521 (3)            | C35  | C38  | 1.475 (5)            |
| C8   | C21  | 1.378 (3)            | C37  | C39  | 1.488 (6)            |

**Table S12. Bond Angles for co-crystals of cyclohexanols 17 + 17-Br.**

| Atom | Atom | Atom | Angle/°     | Atom | Atom | Atom | Angle/°     |
|------|------|------|-------------|------|------|------|-------------|
| C2   | C1   | C6   | 110.19 (14) | C25  | C11  | C18  | 118.6 (2)   |
| C3   | C1   | C2   | 114.44 (15) | C20  | C12  | C3   | 120.8 (2)   |
| C3   | C1   | C6   | 111.86 (15) | C16  | C13  | C7   | 119.29 (19) |
| C1   | C2   | C4   | 111.26 (14) | C22  | C13  | C7   | 122.9 (2)   |
| C1   | C2   | C5   | 108.43 (15) | C22  | C13  | C16  | 117.7 (2)   |
| C5   | C2   | C4   | 108.01 (15) | N2   | C14  | C6   | 177.9 (3)   |
| C12  | C3   | C1   | 118.77 (18) | C23  | C15  | C3   | 120.1 (2)   |
| C12  | C3   | C15  | 118.08 (19) | C13  | C16  | C19  | 121.0 (2)   |
| C15  | C3   | C1   | 123.13 (18) | C19  | C17  | C31  | 120.6 (3)   |
| O1   | C4   | C2   | 110.17 (15) | C26  | C17  | C19  | 117.9 (2)   |
| O1   | C4   | C10  | 105.69 (15) | C26  | C17  | C31  | 121.6 (3)   |
| O1   | C4   | C11  | 111.77 (16) | C11  | C18  | C27  | 120.1 (3)   |
| C10  | C4   | C2   | 109.14 (15) | C17  | C19  | C16  | 121.0 (2)   |
| C11  | C4   | C2   | 109.04 (15) | C24  | C20  | C12  | 121.6 (2)   |
| C11  | C4   | C10  | 110.96 (16) | C8   | C21  | C30  | 120.7 (3)   |
| O2   | C5   | C2   | 117.20 (17) | C13  | C22  | C26  | 120.8 (2)   |
| O2   | C5   | C8   | 120.68 (18) | C24  | C23  | C15  | 121.5 (2)   |
| C8   | C5   | C2   | 122.07 (17) | C20  | C24  | C23  | 117.9 (2)   |
| C1   | C6   | C7   | 112.19 (15) | C20  | C24  | C33  | 120.9 (3)   |
| C9   | C6   | C1   | 106.87 (16) | C23  | C24  | C33  | 121.2 (3)   |
| C9   | C6   | C7   | 108.87 (16) | C11  | C25  | C34  | 120.7 (3)   |
| C9   | C6   | C14  | 108.38 (17) | C17  | C26  | C22  | 121.6 (3)   |
| C14  | C6   | C1   | 111.30 (15) | C29  | C27  | C18  | 120.2 (3)   |
| C14  | C6   | C7   | 109.11 (16) | C36  | C28  | C8   | 120.4 (3)   |
| C10  | C7   | C6   | 108.90 (15) | C34  | C29  | C27  | 119.7 (3)   |
| C13  | C7   | C6   | 111.25 (16) | C32  | C30  | C21  | 120.0 (3)   |
| C13  | C7   | C10  | 114.95 (16) | C30  | C32  | C36  | 120.0 (3)   |
| C21  | C8   | C5   | 123.7 (2)   | C29  | C34  | C25  | 120.7 (3)   |
| C21  | C8   | C28  | 118.6 (2)   | O3   | C35  | O4   | 122.1 (4)   |
| C28  | C8   | C5   | 117.7 (2)   | O3   | C35  | C38  | 121.3 (5)   |
| N1   | C9   | C6   | 176.2 (3)   | O4   | C35  | C38  | 116.5 (4)   |
| C4   | C10  | Br1  | 108.23 (13) | C32  | C36  | C28  | 120.3 (3)   |
| C7   | C10  | Br1  | 107.37 (13) | O5   | C37  | O6   | 120.6 (5)   |
| C7   | C10  | C4   | 113.19 (16) | O5   | C37  | C39  | 118.6 (7)   |
| C18  | C11  | C4   | 120.0 (2)   | O6   | C37  | C39  | 120.8 (8)   |
| C25  | C11  | C4   | 121.4 (2)   |      |      |      |             |



**Table S13. Torsion Angles for co-crystals of cyclohexanols 17 + 17-Br.**

| A  | B   | C   | D   | Angle/°      | A   | B   | C   | D   | Angle/°      |
|----|-----|-----|-----|--------------|-----|-----|-----|-----|--------------|
| O1 | C4  | C10 | Br1 | -59.93 (17)  | C6  | C1  | C3  | C15 | -75.6 (2)    |
| O1 | C4  | C10 | C7  | 59.0 (2)     | C6  | C7  | C10 | Br1 | 176.48 (12)  |
| O1 | C4  | C11 | C18 | 178.69 (19)  | C6  | C7  | C10 | C4  | 57.1 (2)     |
| O1 | C4  | C11 | C25 | -3.8 (3)     | C6  | C7  | C13 | C16 | -87.3 (2)    |
| O2 | C5  | C8  | C21 | -178.0 (2)   | C6  | C7  | C13 | C22 | 91.4 (3)     |
| O2 | C5  | C8  | C28 | 3.5 (3)      | C7  | C13 | C16 | C19 | 176.3 (2)    |
| C1 | C2  | C4  | O1  | -57.36 (19)  | C7  | C13 | C22 | C26 | -177.5 (2)   |
| C1 | C2  | C4  | C10 | 58.26 (19)   | C8  | C21 | C30 | C32 | -0.1 (5)     |
| C1 | C2  | C4  | C11 | 179.62 (15)  | C8  | C28 | C36 | C32 | -0.5 (6)     |
| C1 | C2  | C5  | O2  | 54.8 (2)     | C9  | C6  | C7  | C10 | -171.80 (16) |
| C1 | C2  | C5  | C8  | -127.95 (19) | C9  | C6  | C7  | C13 | 60.5 (2)     |
| C1 | C3  | C12 | C20 | -176.65 (19) | C10 | C4  | C11 | C18 | 61.0 (3)     |
| C1 | C3  | C15 | C23 | 175.8 (2)    | C10 | C4  | C11 | C25 | -121.5 (2)   |
| C1 | C6  | C7  | C10 | -53.7 (2)    | C10 | C7  | C13 | C16 | 148.3 (2)    |
| C1 | C6  | C7  | C13 | 178.58 (15)  | C10 | C7  | C13 | C22 | -33.0 (3)    |
| C2 | C1  | C3  | C12 | -130.74 (19) | C11 | C4  | C10 | Br1 | 61.42 (18)   |
| C2 | C1  | C3  | C15 | 50.7 (3)     | C11 | C4  | C10 | C7  | -179.69 (16) |
| C2 | C1  | C6  | C7  | 54.39 (19)   | C11 | C18 | C27 | C29 | 1.3 (4)      |
| C2 | C1  | C6  | C9  | 173.65 (16)  | C11 | C25 | C34 | C29 | 1.1 (5)      |
| C2 | C1  | C6  | C14 | -68.2 (2)    | C12 | C3  | C15 | C23 | -2.8 (3)     |
| C2 | C4  | C10 | Br1 | -178.40 (12) | C12 | C20 | C24 | C23 | -2.8 (4)     |
| C2 | C4  | C10 | C7  | -59.5 (2)    | C12 | C20 | C24 | C33 | 175.4 (3)    |
| C2 | C4  | C11 | C18 | -59.3 (2)    | C13 | C7  | C10 | Br1 | -57.95 (19)  |
| C2 | C4  | C11 | C25 | 118.2 (2)    | C13 | C7  | C10 | C4  | -177.33 (16) |
| C2 | C5  | C8  | C21 | 4.9 (3)      | C13 | C16 | C19 | C17 | 1.7 (4)      |
| C2 | C5  | C8  | C28 | -173.7 (2)   | C13 | C22 | C26 | C17 | 0.9 (5)      |
| C3 | C1  | C2  | C4  | 176.72 (15)  | C14 | C6  | C7  | C10 | 70.1 (2)     |
| C3 | C1  | C2  | C5  | 58.1 (2)     | C14 | C6  | C7  | C13 | -57.6 (2)    |
| C3 | C1  | C6  | C7  | -177.10 (15) | C15 | C3  | C12 | C20 | 2.0 (3)      |
| C3 | C1  | C6  | C9  | -57.8 (2)    | C15 | C23 | C24 | C20 | 1.9 (4)      |
| C3 | C1  | C6  | C14 | 60.3 (2)     | C15 | C23 | C24 | C33 | -176.2 (3)   |
| C3 | C12 | C20 | C24 | 0.8 (4)      | C16 | C13 | C22 | C26 | 1.2 (4)      |
| C3 | C15 | C23 | C24 | 0.9 (4)      | C18 | C11 | C25 | C34 | -0.4 (4)     |
| C4 | C2  | C5  | O2  | -65.9 (2)    | C18 | C27 | C29 | C34 | -0.7 (5)     |
| C4 | C2  | C5  | C8  | 111.4 (2)    | C19 | C17 | C26 | C22 | -1.8 (4)     |
| C4 | C11 | C18 | C27 | 176.8 (2)    | C21 | C8  | C28 | C36 | 0.8 (5)      |
| C4 | C11 | C25 | C34 | -178.0 (2)   | C21 | C30 | C32 | C36 | 0.4 (6)      |
| C5 | C2  | C4  | O1  | 61.53 (19)   | C22 | C13 | C16 | C19 | -2.5 (4)     |
| C5 | C2  | C4  | C10 | 177.15 (15)  | C25 | C11 | C18 | C27 | -0.7 (4)     |
| C5 | C2  | C4  | C11 | -61.5 (2)    | C26 | C17 | C19 | C16 | 0.5 (4)      |
| C5 | C8  | C21 | C30 | -179.0 (3)   | C27 | C29 | C34 | C25 | -0.5 (5)     |
| C5 | C8  | C28 | C36 | 179.4 (3)    | C28 | C8  | C21 | C30 | -0.5 (4)     |
| C6 | C1  | C2  | C4  | -56.19 (19)  | C30 | C32 | C36 | C28 | -0.1 (7)     |
| C6 | C1  | C2  | C5  | -174.83 (14) | C31 | C17 | C19 | C16 | -179.2 (3)   |
| C6 | C1  | C3  | C12 | 103.0 (2)    | C31 | C17 | C26 | C22 | 177.9 (3)    |

**Table S14. Hydrogen Atom Coordinates ( $\text{\AA} \times 10^4$ ) and Isotropic Displacement Parameters ( $\text{\AA}^2 \times 10^3$ ) for co-crystals of cyclohexanols 17 + 17-Br.**

| Atom | x         | y         | z          | U(eq)    |
|------|-----------|-----------|------------|----------|
| H1   | 6582.72   | 4425.41   | 4611.19    | 74       |
| H4   | 1185.13   | 6638.54   | 10085.04   | 226      |
| H1A  | 4566.96   | 3678.49   | 4483.78    | 45       |
| H2   | 5783.92   | 1646.51   | 4225.16    | 45       |
| H7   | 5219.89   | 4273.38   | 6497.96    | 49       |
| H10A | 6418.51   | 2243.26   | 6217.59    | 54       |
| H10B | 6978.34   | 3464.93   | 6766.63    | 54       |
| H12  | 2932.17   | 3730.43   | 3431.21    | 60       |
| H15  | 3988.82   | 630.92    | 3459.43    | 65       |
| H16  | 3992.85   | 4823.63   | 7862.14    | 66       |
| H18  | 7514.22   | 1099.8    | 4957.46    | 75       |
| H19  | 3401.63   | 4719.48   | 9460.41    | 79       |
| H20  | 1434.63   | 2896.7    | 2193.58    | 74       |
| H21  | 6305.09   | 406.28    | 2989.64    | 80       |
| H22  | 5763.87   | 2029.31   | 7706.56    | 76       |
| H23  | 2448.8    | -184.2    | 2244.52    | 79       |
| H25  | 8599.05   | 4162.59   | 4753.02    | 78       |
| H26  | 5223.48   | 1975.35   | 9330.31    | 89       |
| H27  | 9270.88   | 389.21    | 4489.77    | 98       |
| H28  | 6735.34   | 2739.19   | 1402.4     | 89       |
| H29  | 10694.16  | 1581.77   | 4202.49    | 108      |
| H30  | 6977.44   | -966.37   | 1622.21    | 105      |
| H31A | 4042.53   | 3973.49   | 11137.09   | 142      |
| H31B | 4215.78   | 2656.62   | 10830.4    | 142      |
| H31C | 3028.58   | 3117.1    | 10529.02   | 142      |
| H32  | 7505.74   | -488.85   | 150        | 118      |
| H33B | 618.48    | 1095.97   | 795.41     | 148      |
| H33A | 42.4      | 835.26    | 1740.22    | 148      |
| H33C | 812.52    | -64.27    | 1072.85    | 148      |
| H34  | 10356.69  | 3455.53   | 4347.31    | 104      |
| H36  | 7387.67   | 1358.54   | 41.48      | 125      |
| H38A | 1209.79   | 5896.18   | 7447.63    | 223      |
| H38B | 228.55    | 4955.91   | 7314.54    | 223      |
| H38C | 1468.15   | 4779.66   | 7786.04    | 223      |
| H39C | -1195.47  | 7964.7    | 12731.85   | 302      |
| H39B | -277.76   | 8943      | 12790.33   | 302      |
| H39A | 77.72     | 7877.42   | 13177.68   | 302      |
| H5   | -760 (90) | 6700 (80) | 10320 (30) | 320 (50) |

**Table S15. Atomic Occupancy for co-crystals of cyclohexanols 17 + 17-Br.**

| Atom | Occupancy | Atom | Occupancy | Atom | Occupancy |
|------|-----------|------|-----------|------|-----------|
| Br1  | 0.61      | H10B | 0.39      |      |           |

**Experimental**

Single crystals of  $C_{39}H_{37.39}Br_{0.61}N_2O_6$  **17 + 17-Br** were crystallized by slow evaporation of AcOH solution. A suitable crystal was selected and studied on a SuperNova, Dual, Cu at home/near, AtlasS2 diffractometer. The crystal was kept at 293(2) K during data collection. Using Olex2 [1], the structure was solved with the SHELXT [2] structure solution program using Intrinsic Phasing and refined with the SHELXL [3] refinement package using Least Squares minimisation.

1. Dolomanov, O.V., Bourhis, L.J., Gildea, R.J., Howard, J.A.K. & Puschmann, H. (2009), J. Appl. Cryst. 42, 339-341.
2. Sheldrick, G.M. (2015). Acta Cryst. A71, 3-8.
3. Sheldrick, G.M. (2015). Acta Cryst. C71, 3-8.

**Crystal structure determination of co-crystals of cyclohexanols 17 + 17-Br**

**Crystal Data** for  $C_{39}H_{37.39}Br_{0.61}N_2O_6$  ( $M = 678.84$  g/mol): triclinic, space group P-1 (no. 2),  $a = 11.7101(2)$  Å,  $b = 12.1777(2)$  Å,  $c = 13.1548(3)$  Å,  $\alpha = 105.5935(16)^\circ$ ,  $\beta = 95.2886(16)^\circ$ ,  $\gamma = 91.2975(15)^\circ$ ,  $V = 1796.97(6)$  Å<sup>3</sup>,  $Z = 2$ ,  $T = 293(2)$  K,  $\mu(\text{Cu K}\alpha) = 1.436$  mm<sup>-1</sup>,  $D_{\text{calc}} = 1.255$  g/cm<sup>3</sup>, 26097 reflections measured ( $7.014^\circ \leq 2\theta \leq 152.508^\circ$ ), 7469 unique ( $R_{\text{int}} = 0.0156$ ,  $R_{\text{sigma}} = 0.0143$ ) which were used in all calculations. The final  $R_1$  was 0.0527 ( $I > 2\sigma(I)$ ) and  $wR_2$  was 0.1366 (all data).

**Refinement model description**

Number of restraints - 1, number of constraints - unknown.

Details:

1. Fixed Uiso  
At 1.2 times of:  
All C(H) groups, All C(H,H) groups  
At 1.5 times of:  
All C(H,H,H) groups, All O(H) groups
2. Restrained distances  
H5-O5  
0.82 with sigma of 0.02
3. Others  
Fixed Sof: Br1(0.61) H10B(0.39)
- 4.a Ternary CH refined with riding coordinates:  
C1(H1A), C2(H2), C7(H7)
- 4.b Secondary CH2 refined with riding coordinates:  
C10(H10A,H10B)
- 4.c Aromatic/amide H refined with riding coordinates:  
C12(H12), C15(H15), C16(H16), C18(H18), C19(H19), C20(H20), C21(H21),  
C22(H22), C23(H23), C25(H25), C26(H26), C27(H27), C28(H28), C29(H29), C30(H30),  
C32(H32), C34(H34), C36(H36)
- 4.d Idealised Me refined as rotating group:  
C31(H31A,H31B,H31C), C33(H33B,H33A,H33C), C38(H38A,H38B,H38C), C39(H39C,H39B,  
H39A)
- 4.e Idealised tetrahedral OH refined as rotating group:  
O1(H1), O4(H4)
